# Supplementary material
Source: PubMed Central journal article supplement (PMC6638173)
Supplement: MPP-19-454-s004.pdf [file MPP-19-454-s004.pdf]

Table S1. RNA-sequencing data for all transcripts in *Ralstonia solanacearum* strain OE1-1, *phcB*-deleted mutant (*ΔphcB*), *phcA*-deleted mutant (*ΔphcA*), and ralfuranones-deficient mutant (*ΔralA*) grown in 1/4 × M63 medium

| Gene ID | Gene name    | Description                                                     | OEI-1   |         |          |         |        | <i>ΔphcB</i> |         |         |         |        | <i>ΔphcA</i> |         |         |         |        | <i>ΔralA</i> |         |         |         |        | log <sub>2</sub> (fold cngane) |              |              | fold change  |              |              |
|---------|--------------|-----------------------------------------------------------------|---------|---------|----------|---------|--------|--------------|---------|---------|---------|--------|--------------|---------|---------|---------|--------|--------------|---------|---------|---------|--------|--------------------------------|--------------|--------------|--------------|--------------|--------------|
|         |              |                                                                 | count   | FPKM    | conf_lo  | conf_hi | status | count        | FPKM    | conf_lo | conf_hi | status | count        | FPKM    | conf_lo | conf_hi | status | count        | FPKM    | conf_lo | conf_hi | status | <i>AphcB</i>                   | <i>AphcA</i> | <i>AralA</i> | <i>AphcB</i> | <i>AphcA</i> | <i>AralA</i> |
| RSc0001 | <i>rpmH</i>  | 50S ribosomal protein L34                                       | 241.356 | 1733.28 | 69.6485  | 247.109 | OK     | 428.718      | 3306.32 | 120.692 | 437.927 | OK     | 343.452      | 1291.4  | 110.592 | 320.482 | OK     | 285.575      | 1846.65 | 92.2385 | 247.538 | OK     | 0.931722                       | -0.42457     | 0.091406     | 1.907551     | -1.34217     | 1.065408     |
| RSc0002 | <i>rnpA</i>  | ribonuclease P protein component                                | 409.696 | 112.532 | 36.7541  | 182.469 | OK     | 650.438      | 181.509 | 58.0585 | 289.479 | OK     | 624.66       | 150.664 | 65.2964 | 233.591 | OK     | 569.336      | 149.174 | 59.3603 | 213.055 | OK     | 0.689706                       | 0.420999     | 0.406661     | 1.612955     | 1.338855     | 1.325614     |
| RSc0003 |              | hypothetical protein                                            | 119.664 | 49.7337 | 0.415612 | 109.722 | OK     | 126.96       | 53.9475 | 0       | 132.575 | OK     | 141.16       | 49.1478 | 2.4372  | 97.4879 | OK     | 136.894      | 53.7158 | 3.13911 | 104.768 | OK     | 0.117332                       | -0.0171      | 0.111123     | 1.084727     | -1.01192     | 1.080068     |
| RSc0004 |              | putative inner membrane protein translocase component YidC      | 4132.46 | 177.422 | 79.1256  | 275.661 | OK     | 7197.13      | 309.785 | 130.313 | 488.316 | OK     | 7389.22      | 306.949 | 169.57  | 443.766 | OK     | 5550.12      | 233.761 | 129.777 | 337.459 | OK     | 0.804082                       | 0.790814     | 0.397849     | 1.746035     | 1.73005      | 1.317542     |
| RSc0005 | <i>trmE</i>  | tRNA modification GTPase TrmE                                   | 1483.63 | 74.4133 | 33.0022  | 115.619 | OK     | 1682.67      | 84.647  | 37.5895 | 131.162 | OK     | 1409.38      | 68.1739 | 38.4001 | 97.5821 | OK     | 1647.27      | 80.9751 | 45.2542 | 116.694 | OK     | 0.185898                       | -0.12634     | 0.121918     | 1.137525     | -1.09152     | 1.08818      |
| RSc0006 |              | hypothetical protein                                            | 85.1844 | 33.5169 | 10.3366  | 35.5796 | OK     | 133.4        | 53.6156 | 15.9015 | 55.0589 | OK     | 158.944      | 52.7437 | 21.1772 | 58.6295 | OK     | 177.691      | 66.0903 | 23.9224 | 65.8846 | OK     | 0.677764                       | 0.65411      | 0.97955      | 1.599659     | 1.573645     | 1.97185      |
| RSc0007 |              | hypothetical protein                                            | 74.0293 | 12.815  | 5.30645  | 19.1756 | OK     | 124.2        | 21.7213 | 9.04508 | 30.8739 | OK     | 87.8081      | 13.8977 | 6.90044 | 20.2254 | OK     | 90.6586      | 15.1405 | 7.13838 | 20.9393 | OK     | 0.761277                       | 0.117013     | 0.240579     | 1.69499      | 1.084487     | 1.181467     |
| RSc0008 | <i>rpsU</i>  | 30S ribosomal protein S21                                       | 1964.31 | 2063.88 | 321.4    | 1343.65 | OK     | 2497.79      | 2725.8  | 413.92  | 1694.99 | OK     | 2293.01      | 1773.6  | 448.3   | 1421.86 | OK     | 1439.66      | 1412.38 | 280.076 | 894.215 | OK     | 0.401321                       | -0.21868     | -0.54723     | 1.320716     | -1.16367     | -1.46128     |
| RSc0009 |              | drug efflux lipoprotein                                         | 8021.53 | 373.53  | 156.48   | 590.405 | OK     | 8973.65      | 419.017 | 172.153 | 665.06  | OK     | 12522.1      | 563.259 | 301.045 | 826.157 | OK     | 8093.09      | 369.528 | 201.533 | 535.763 | OK     | 0.165785                       | 0.592574     | -0.01554     | 1.121776     | 1.507935     | -1.01083     |
| RSc0010 | <i>acrB</i>  | putative acriflavin resistance transmembrane proteir            | 21834.6 | 470.605 | 162.515  | 778.311 | OK     | 23275        | 502.288 | 171.634 | 833.165 | OK     | 28864.4      | 607.742 | 283.21  | 932.2   | OK     | 19527        | 414.021 | 210.38  | 617.83  | OK     | 0.093998                       | 0.368942     | -0.18481     | 1.067324     | 1.291406     | -1.13667     |
| RSc0011 | <i>acrA</i>  | acriflavin resistance lipoprotein A precursor                   | 9468.65 | 589.166 | 242.324  | 935.455 | OK     | 8703.17      | 543.53  | 225.323 | 861.962 | OK     | 6718.99      | 401.04  | 219.574 | 582.134 | OK     | 5323.47      | 324.136 | 176.636 | 470.622 | OK     | -0.11631                       | -0.55493     | -0.86207     | -1.08396     | -1.4691      | -1.81765     |
| RSc0012 | <i>acrR</i>  | putative AcrAB operon repressor transcription regulator protein | 3897.19 | 503.975 | 152.708  | 854.094 | OK     | 2661.55      | 346.83  | 120.898 | 572.681 | OK     | 1414.93      | 170.444 | 79.8958 | 260.095 | OK     | 1746.99      | 219.166 | 100.977 | 336.814 | OK     | -0.53912                       | -1.56405     | -1.20133     | -1.45309     | -2.95684     | -2.29951     |
| RSc0013 |              | hypothetical protein                                            | 2623.48 | 230.81  | 5.10277  | 456.874 | OK     | 1387.35      | 122.694 | 3.89125 | 250.19  | OK     | 769.154      | 64.1784 | 16.7715 | 111.559 | OK     | 879.388      | 75.4563 | 16.8179 | 134.114 | OK     | -0.91164                       | -1.84655     | -1.61299     | -1.88118     | -3.59638     | -3.05886     |
| RSc0014 | <i>gor</i>   | glutathione reductase oxidoreductase protein                    | 285.976 | 14.3435 | 7.30412  | 21.3779 | OK     | 207.919      | 10.4594 | 5.34448 | 15.5435 | OK     | 96.7         | 4.67755 | 2.72404 | 6.59041 | OK     | 124.202      | 6.10545 | 3.60276 | 8.56754 | OK     | -0.4556                        | -1.61657     | -1.23223     | -1.37135     | -3.06646     | -2.34929     |
| RSc0015 |              | hypothetical protein                                            | 2625.51 | 231.939 | 101.264  | 360.241 | OK     | 4143.66      | 367.971 | 158.726 | 575.272 | OK     | 2924.34      | 244.973 | 132.126 | 355.592 | OK     | 2828.55      | 243.692 | 129.559 | 357.731 | OK     | 0.665847                       | 0.078877     | 0.071313     | 1.586499     | 1.056196     | 1.050673     |
| RSc0016 | <i>serA1</i> | putative D-3-phosphoglycerate dehydrogenase oxidoreductase      | 6966.87 | 498.522 | 210.789  | 786.274 | OK     | 7578.93      | 544.617 | 228.557 | 860.438 | OK     | 7630.41      | 521.595 | 281.465 | 760.465 | OK     | 9492.86      | 663.9   | 349.962 | 976.245 | OK     | 0.127585                       | 0.065273     | 0.413309     | 1.092463     | 1.046283     | 1.331737     |
| RSc0017 | <i>pckA</i>  | phosphoenolpyruvate carboxykinase                               | 20720.1 | 781.716 | 285.652  | 1277.34 | OK     | 11381.3      | 430.344 | 170.22  | 690.459 | OK     | 21070.6      | 770.932 | 385.269 | 1156.32 | OK     | 9553.6       | 353.824 | 192.6   | 514.371 | OK     | -0.86115                       | -0.02004     | -1.14361     | -1.81649     | -1.01399     | -2.20934     |
| RSc0018 |              | response regulator transcription regulator protein              | 8519.45 | 809.228 | 322.925  | 1288.4  | OK     | 3964.27      | 378.67  | 161.846 | 593.026 | OK     | 552.413      | 49.612  | 27.7573 | 70.9436 | OK     | 1805.01      | 167.064 | 88.3392 | 245.656 | OK     | -1.09561                       | -4.02779     | -2.27615     | -2.13703     | -16.3111     | -4.84382     |
| RSc0019 |              | hypothetical protein                                            | 4396.12 | 924.866 | 328.06   | 1359.3  | OK     | 2281.59      | 485.991 | 171.048 | 706.897 | OK     | 660.228      | 125.059 | 59.4591 | 181.771 | OK     | 812.301      | 164.133 | 73.0342 | 222.496 | OK     | -0.92831                       | -2.88664     | -2.49438     | -1.93035     | -7.39544     | -5.63486     |
| RSc0020 |              | hypothetical protein                                            | 1655.01 | 169.989 | 71.5839  | 266.419 | OK     | 1426.91      | 147.454 | 61.7074 | 232.872 | OK     | 905.868      | 87.6767 | 47.5883 | 127.144 | OK     | 1105.13      | 110.496 | 57.8146 | 162.171 | OK     | -0.20518                       | -0.95518     | -0.62145     | -1.15283     | -1.93882     | -1.53842     |
| RSc0021 |              | transmembrane sensor histidine kinase transcription regulator   | 734.208 | 36.3161 | 16.9361  | 55.5151 | OK     | 776.477      | 38.5191 | 17.8158 | 59.2102 | OK     | 689.127      | 32.8836 | 19.0942 | 46.6072 | OK     | 886.641      | 42.9862 | 24.4753 | 61.4052 | OK     | 0.084965                       | -0.14324     | 0.243264     | 1.060662     | -1.10438     | 1.183668     |
| RSc0022 | <i>cstA</i>  | carbon starvation A transmembrane protein                       | 11968.4 | 405.885 | 159.612  | 652.728 | OK     | 16980.4      | 577.009 | 214.514 | 939.736 | OK     | 10867.1      | 358.018 | 194.787 | 520.83  | OK     | 9927.12      | 330.649 | 179.374 | 481.804 | OK     | 0.507523                       | -0.18104     | -0.29577     | 1.421607     | -1.1337      | -1.22754     |
| RSc0023 |              | hypothetical protein                                            | 561.811 | 774.504 | 107.005  | 408.533 | OK     | 868.477      | 1249.16 | 159.847 | 645.331 | OK     | 822.506      | 800.363 | 177.563 | 547.349 | OK     | 766.972      | 986.862 | 164.856 | 503.692 | OK     | 0.689614                       | 0.047382     | 0.349576     | 1.612582     | 1.033888     | 1.274186     |
| RSc0024 |              | putative signal peptide protein                                 | 970.494 | 104.69  | 44.8855  | 164.184 | OK     | 793.037      | 86.0951 | 37.4    |         |        |              |         |         |         |        |              |         |         |         |        |                                |              |              |              |              |              |

|         |       |                                                                                                       |         |         |          |         |    |         |         |          |         |    |         |         |         |         |    |         |         |          |         |    |          |          |          |          |          |          |
|---------|-------|-------------------------------------------------------------------------------------------------------|---------|---------|----------|---------|----|---------|---------|----------|---------|----|---------|---------|---------|---------|----|---------|---------|----------|---------|----|----------|----------|----------|----------|----------|----------|
| RSc0081 |       | hypothetical protein                                                                                  | 513.135 | 44.5967 | 20.7538  | 67.9669 | OK | 526.238 | 45.971  | 21.3244  | 70.5344 | OK | 313.442 | 25.8481 | 14.9859 | 36.5148 | OK | 514.941 | 43.6541 | 24.2025  | 62.8984 | OK | 0.043787 | -0.78688 | -0.03082 | 1.030816 | -1.72534 | -1.02159 |
| RSc0082 |       | hypothetical protein                                                                                  | 995.846 | 53.8482 | 19.6106  | 88.0575 | OK | 932.877 | 50.6045 | 19.0871  | 82.1077 | OK | 842.513 | 43.8594 | 23.7128 | 63.9542 | OK | 878.482 | 46.5321 | 25.4032  | 67.382  | OK | -0.08963 | -0.29601 | -0.21067 | -1.0641  | -1.22775 | -1.15723 |
| RSc0083 |       | hypothetical protein                                                                                  | 391.443 | 36.8554 | 0.659069 | 82.4778 | OK | 315.559 | 29.8766 | 0.284035 | 68.547  | OK | 240.083 | 21.3804 | 1.87014 | 40.965  | OK | 189.476 | 17.3852 | 0.917537 | 35.1417 | OK | -0.30286 | -0.78559 | -1.08402 | -1.23359 | -1.72379 | -2.11993 |
| RSc0084 |       | amino-acid-binding periplasmic (PBP) ABC transporter protein                                          | 982.663 | 85.0591 | 37.6028  | 132.143 | OK | 976.116 | 84.9258 | 37.3185  | 132.498 | OK | 1438.27 | 118.148 | 64.0926 | 171.381 | OK | 873.042 | 73.717  | 39.83    | 106.727 | OK | -0.00226 | 0.474058 | -0.20647 | -1.00157 | 1.389011 | -1.15386 |
| RSc0085 | cca   | multifunctional tRNA nucleotidyl transferase/2'3'-cyclic phosphodiesterase/2'nucleotidase/phosphatase | 3252.22 | 185.678 | 42.1851  | 328.894 | OK | 3304.63 | 189.308 | 43.8825  | 334.636 | OK | 2261.89 | 124.159 | 47.5256 | 200.543 | OK | 2368.91 | 132.435 | 53.3862  | 211.329 | OK | 0.027932 | -0.58061 | -0.48752 | 1.01955  | -1.49549 | -1.40203 |
| RSc0086 |       | hypothetical protein                                                                                  | 3435.77 | 419.062 | 48.5442  | 792.563 | OK | 3455.51 | 424.522 | 42.6302  | 807.394 | OK | 2974.36 | 339.011 | 136.09  | 542.192 | OK | 2998.08 | 355.085 | 138.69   | 571.698 | OK | 0.018676 | -0.30583 | -0.239   | 1.013029 | -1.23613 | -1.18017 |
| RSc0087 |       | putative NADH-ubiquinone oxidoreductase oxidoreductase                                                | 820.407 | 62.6746 | 28.3877  | 96.6335 | OK | 456.318 | 35.0179 | 16.7891  | 52.9306 | OK | 705.799 | 51.3989 | 29.0791 | 73.0771 | OK | 620.105 | 46.2715 | 25.8551  | 66.3763 | OK | -0.83979 | -0.28614 | -0.43776 | -1.78979 | -1.21938 | -1.3545  |
| RSc0088 | slt   | soluble lytic murein transglycosylase precursor transmembran                                          | 8197.98 | 294.783 | 121.877  | 467.756 | OK | 9302.09 | 335.195 | 136.584  | 533.872 | OK | 11626.2 | 405.753 | 219.156 | 592.343 | OK | 11601.6 | 409.615 | 220.393  | 597.939 | OK | 0.185347 | 0.460948 | 0.474615 | 1.137091 | 1.376446 | 1.389548 |
| RSc0089 |       | hypothetical protein                                                                                  | 601.361 | 87.2242 | 36.5577  | 137.623 | OK | 560.278 | 81.9663 | 34.3259  | 129.015 | OK | 584.646 | 78.4606 | 40.8867 | 114.168 | OK | 573.869 | 80.5871 | 40.1528  | 120.668 | OK | -0.0897  | -0.15276 | -0.11418 | -1.06415 | -1.11169 | -1.08236 |
| RSc0090 |       | hypothetical protein                                                                                  | 501.98  | 108.798 | 40.8294  | 155.039 | OK | 597.998 | 131.272 | 48.1254  | 185.065 | OK | 1190.41 | 231.703 | 107.27  | 342.019 | OK | 601.066 | 125.029 | 55.3652  | 166.788 | OK | 0.270907 | 1.090625 | 0.200611 | 1.206566 | 2.129662 | 1.149185 |
| RSc0091 | metF  | 5,10-methylenetetrahydrofolate reductase oxidoreductase protein                                       | 2500.77 | 240.733 | 104.158  | 376.719 | OK | 3418.71 | 330.976 | 142.287  | 519.393 | OK | 6095.44 | 554.483 | 293.652 | 808.174 | OK | 3101.43 | 290.869 | 153.057  | 428.208 | OK | 0.459293 | 1.203709 | 0.272936 | 1.374868 | 2.303311 | 1.208264 |
| RSc0092 |       | hypothetical protein                                                                                  | 1119.57 | 397.844 | 115.056  | 478.488 | OK | 1156.44 | 419.1   | 118.445  | 494.494 | OK | 1896.21 | 575.229 | 230.163 | 733.957 | OK | 867.603 | 292.155 | 105.886  | 331.219 | OK | 0.075092 | 0.531934 | -0.44547 | 1.053428 | 1.445866 | -1.36176 |
| RSc0093 | ahcY  | S-adenosyl-L-homocysteine hydrolase                                                                   | 22431.9 | 1143.81 | 417.635  | 1869.89 | OK | 29795.9 | 1523.88 | 543.228  | 2502.42 | OK | 77465.6 | 3808.03 | 1340.18 | 6279.02 | OK | 32699.6 | 1633.98 | 762.87   | 2504.3  | OK | 0.413902 | 1.735197 | 0.514543 | 1.332284 | 3.32925  | 1.428541 |
| RSc0094 |       | putative lipoprotein transmembran                                                                     | 532.403 | 87.9114 | 25.6671  | 149.802 | OK | 109.48  | 18.2551 | 6.88344  | 29.5171 | OK | 87.8081 | 13.3013 | 6.44523 | 19.9112 | OK | 119.669 | 19.0826 | 8.97729  | 28.6583 | OK | -2.26775 | -2.72448 | -2.20379 | -4.81572 | -6.60923 | -4.60689 |
| RSc0095 |       | hypothetical protein                                                                                  | 426.936 | 101.745 | 15.2522  | 188.984 | OK | 59.7998 | 14.4512 | 2.41659  | 26.5825 | OK | 37.7908 | 8.01899 | 2.12194 | 13.7926 | OK | 41.703  | 9.51554 | 2.28174  | 16.8849 | OK | -2.8157  | -3.66539 | -3.41853 | -7.04059 | -12.688  | -10.6925 |
| RSc0096 |       | hypothetical protein                                                                                  | 91.269  | 47.6386 | 12.5605  | 44.0759 | OK | 13.7999 | 7.39239 | 1.59861  | 8.2214  | OK | 15.5609 | 6.60779 | 1.80231 | 7.43455 | OK | 15.412  | 7.56052 | 1.80231  | 7.88513 | OK | -2.68802 | -2.84989 | -2.65557 | -6.44428 | -7.20946 | -6.30097 |
| RSc0097 |       | putative alkaline phosphatase lipoprotein transmembran                                                | 498.937 | 24.9085 | 12.0641  | 37.7447 | OK | 287.959 | 14.4812 | 7.31829  | 21.467  | OK | 477.943 | 23.0138 | 13.6077 | 32.3346 | OK | 944.662 | 46.2225 | 26.209   | 66.2444 | OK | -0.78875 | -0.11414 | 0.891957 | -1.72757 | -1.08233 | 1.855692 |
| RSc0098 |       | putative alkaline phosphatase signal peptide proteir                                                  | 461.416 | 23.9255 | 11.7426  | 36.1453 | OK | 328.439 | 17.0826 | 8.66936  | 25.4577 | OK | 349.009 | 17.4399 | 10.4528 | 24.4352 | OK | 653.648 | 33.2108 | 19.0957  | 47.2867 | OK | -0.48602 | -0.45616 | 0.473103 | -1.40058 | -1.37188 | 1.388092 |
| RSc0099 |       | putative signal peptide protein                                                                       | 126.763 | 15.2021 | 7.00211  | 23.1254 | OK | 110.4   | 13.3341 | 6.17291  | 20.085  | OK | 67.8012 | 7.60504 | 3.99913 | 11.1794 | OK | 108.79  | 12.6722 | 6.63492  | 17.9052 | OK | -0.18915 | -0.99924 | -0.2626  | -1.14009 | -1.99895 | -1.19964 |
| RSc0100 | thiD  | bifunctional hydroxy-phosphomethylpyrimidine kinase/hydroxy-methylpyrimidine kinase                   | 4107.11 | 355.51  | 154.321  | 554.801 | OK | 3127.07 | 272.067 | 119.206  | 424.791 | OK | 2977.69 | 244.604 | 132.533 | 355.805 | OK | 3604.59 | 304.36  | 161.844  | 446.685 | OK | -0.38593 | -0.53944 | -0.22411 | -1.3067  | -1.45341 | -1.16806 |
| RSc0101 |       | putative lipoprotein transmembran                                                                     | 922.831 | 294.434 | 90.6581  | 370.084 | OK | 675.278 | 219.364 | 67.7718  | 267.184 | OK | 392.358 | 108.184 | 46.5548 | 127.588 | OK | 679.939 | 206.133 | 78.9332  | 241.175 | OK | -0.42462 | -1.44446 | -0.51437 | -1.34222 | -2.7216  | -1.42837 |
| RSc0102 |       | putative calcium binding hemolysin protein                                                            | 10502   | 193.683 | 74.2004  | 313.193 | OK | 5984.58 | 110.49  | 45.5425  | 175.261 | OK | 2523.09 | 45.5205 | 26.1672 | 64.853  | OK | 4785.87 | 86.8622 | 48.9266  | 124.89  | OK | -0.80978 | -2.08911 | -1.1569  | -1.75295 | -4.25485 | -2.22977 |
| RSc0104 |       | putative hemolysin-type calcium-binding protein                                                       | 14830.2 | 351.002 | 110.625  | 592.081 | OK | 7793.29 | 184.71  | 64.9886  | 305.105 | OK | 3394.51 | 78.4097 | 42.4329 | 114.317 | OK | 7374.17 | 171.646 | 90.0108  | 253.389 | OK | -0.92622 | -2.16238 | -1.03204 | -1.90029 | -4.47651 | -2.04492 |
| RSc0107 |       | hypothetical protein                                                                                  | 1278.78 | 258.904 | 92.5764  | 390.297 | OK | 372.599 | 76.3434 | 29.6513  | 110.153 | OK | 459.047 | 83.9486 | 40.7661 | 121.107 | OK | 619.198 | 120.516 | 54.5313  | 165.579 | OK | -1.76184 | -1.62484 | -1.10319 | -3.39131 | -3.08408 | -2.1483  |
| RSc0108 | thiE1 | thiamine-phosphate pyrophosphorylase protein                                                          | 947.169 | 61.6144 | 4.80771  | 118.572 | OK | 1119.64 | 73.114  | 5.53446  | 140.43  | OK | 475.72  | 29.648  | 7.72085 | 51.6194 | OK | 805.955 | 51.2849 | 13.6218  | 88.7347 | OK | 0.24688  | -1.05533 | -0.26473 | 1.186638 | -2.0782  | -1.20141 |
| RSc0109 | thiG  | thiazole synthase                                                                                     | 2425.73 | 234.561 | 67.6881  | 401.584 | OK | 2943.07 | 286.219 | 83.1503  | 489.663 | OK | 1311.56 | 119.824 | 58.2873 | 181.988 | OK | 2193.03 | 206.589 | 97.8765  | 315.296 | OK | 0.287156 | -0.96905 | -0.1832  | 1.220233 | -1.95755 | -1.1354  |
| RSc0111 |       | sulfur carrier protein ThiS                                                                           | 437.077 | 379.869 | 8.19135  | 733.55  | OK | 492.198 | 442.877 | 7.90889  | 854.16  | OK | 152.275 | 100.226 | 4.17971 | 196.168 | OK | 361.728 | 293.766 | 18.1121  | 531.102 | OK | 0.221404 | -1.92225 | -0.37083 | 1.165868 | -3.79012 | -1.2931  |
| RSc0112 |       | putative D-amino acid oxidase flavoprotein oxidoreductase                                             | 3503.72 | 230.717 | 84.2212  | 377.185 | OK | 4158.38 | 274.894 | 97.7046  | 451.966 | OK | 1920.66 | 121.126 | 64.7675 | 177.527 | OK | 3005.33 | 193.563 | 101.698  | 285.514 | OK | 0.252751 | -0.92962 | -0.25332 | 1.191477 | -1.90477 | -1.19195 |
| RSc0113 | thiC  | thiamine biosynthesis protein ThiC                                                                    | 14219.7 | 528.12  | 202.68   | 853.517 | OK | 15331.7 | 570.671 | 216.572  | 924.847 | OK | 12016.4 | 432.924 | 233.72  | 632.032 | OK | 16216.1 | 591.268 | 308.946  | 872.956 | OK | 0.111793 | -0.28675 | 0.162946 | 1.080571 | -1.21989 | 1.119571 |
| RSc0114 |       | hypothetical protein                                                                                  | 15246   | 937.775 | 364.033  | 1509.29 | OK | 17609.7 | 1087.11 | 412.933  | 1760.61 | OK | 7807.14 | 460.794 | 252.655 | 666.11  | OK | 19198.8 | 1155.69 | 587.076  | 1723.87 | OK | 0.213184 | -1.02512 | 0.301441 | 1.159244 | -2.03513 | 1.232375 |
| RSc0115 |       | putative hemagglutinin-related protein                                                                | 13753.2 | 182.36  | 65.6713  | 298.819 | OK | 6848.45 | 90.8774 | 36.5439  | 145.38  | OK | 1268.22 | 16.489  | 9.51898 | 23.4557 | OK | 4194.77 | 54.7745 | 30.9114  | 78.6455 | OK | -1.0048  | -3.46721 | -1.73521 | -2.00666 | -1.10595 | -3.32929 |
| RSc0116 |       | hypothetical protein                                                                                  | 9078.22 | 1510.63 | 541.954  | 2468.47 | OK | 202.399 | 34.013  | 14.4286  | 50.6762 | OK | 188.954 | 28.8292 | 14.9282 | 41.0815 | OK | 205.795 | 33.0652 | 16.2011  | 46.1732 | OK | -5.47292 | -5.71148 | -5.51369 | -44.4133 | -52.3993 | -45.6864 |
| RSc0117 |       | hypothetical protein                                                                                  | 6261.05 | 1083.83 | 397.984  | 1719.17 | OK | 161.919 | 28.3181 | 11.8189  | 42.8134 | OK | 212.296 | 33.6008 | 17.2511 | 47.1133 | OK | 188.57  | 31.4923 | 15.3475  | 42.1165 | OK | -5.25827 | -5.0115  | -5.105   | -38.2734 | -32.2561 | -34.4157 |
| RSc0118 |       | hypothetical protein                                                                                  | 7157.52 | 1280.29 | 462.034  | 2022.96 | OK | 260.359 | 47.0667 | 19.2463  | 69.2126 | OK | 255.644 | 41.7086 | 21.1772 | 57.5679 | OK | 254.751 | 43.9307 | 21.1772  | 60.3672 | OK | -4.76562 | -4.93998 | -4.8651  | -27.2016 | -30.6691 | -29.1434 |
| RSc0119 |       | hypothetical protein                                                                                  | 1473.49 | 515.261 | 148.029  | 626.463 | OK | 52.4398 | 18.6968 | 5.78676  | 20.7203 | OK | 55.5747 | 16.6211 | 6.62938 | 19.704  | OK | 52.582  | 17.4309 | 6.26108  | 18.7833 | OK | -4.78444 | -4.95422 | -4.88558 | -27.5588 | -31.0004 | -29.5602 |
| RSc0120 |       | hypothetical protein                                                                                  | 1656.03 | 320.206 | 116.312  | 489.708 | OK | 81.8797 | 16.014  | 6.37505  | 22.3777 | OK | 67.8012 | 11.886  | 5.64725 | 16.9418 | OK | 88.8454 | 16.5326 | 7.57245  | 22.0756 | OK | -4.32159 | -4.75167 | -4.27561 | -19.9954 | -26.9398 | -19.3682 |
| RSc0121 | aidB  | putative oxidoreductase flavoprotein FAE                                                              | 2889.17 | 123.059 | 55.8988  | 190.125 | OK | 1581.47 | 67.5294 | 29.8922  | 105.104 | OK | 1698.36 | 70.001  | 39.7737 | 100.041 | OK | 1791.41 | 74.8555 | 42.2785  | 107.138 | OK | -0.86576 | -0.8139  | -0.71717 | -1.8223  | -1.75796 | -1.64395 |
| RSc0122 |       | substrate-binding periplasmic (PBP) ABC transporter protein                                           | 2624.49 | 229.022 | 100.251  | 356.495 | OK | 4036.03 | 354.019 | 153.274  | 554.492 | OK | 3801.31 | 314.702 | 169.912 | 457.851 | OK | 3425.08 | 291.528 | 154.947  | 426.721 | OK | 0.628341 | 0.4585   | 0.348148 | 1.545786 | 1.374113 | 1.272926 |
| RSc0123 |       | putative alcohol dehydrogenase oxidoreductase protein                                                 | 1451.18 | 59.7933 | 26.4324  | 93.1481 | OK | 1251.2  | 51.6789 | 22.9977  | 80.3052 | OK |         |         |         |         |    |         |         |          |         |    |          |          |          |          |          |          |

|                |             |                                                                                  |         |         |         |         |    |         |         |         |         |    |         |         |         |         |    |         |         |         |         |    |          |          |          |          |          |          |
|----------------|-------------|----------------------------------------------------------------------------------|---------|---------|---------|---------|----|---------|---------|---------|---------|----|---------|---------|---------|---------|----|---------|---------|---------|---------|----|----------|----------|----------|----------|----------|----------|
| <b>RSc0167</b> |             | hypothetical protein                                                             | 339.724 | 82.7906 | 8.31468 | 157.223 | OK | 351.439 | 86.8724 | 5.29116 | 168.41  | OK | 390.135 | 84.4772 | 17.8962 | 150.627 | OK | 476.864 | 111.203 | 20.4315 | 201.929 | OK | 0.069431 | 0.029095 | 0.425657 | 1.049303 | 1.020372 | 1.343184 |
| <b>RSc0168</b> |             | hypothetical conserved protein                                                   | 1202.72 | 71.52   | 21.5858 | 121.368 | OK | 1799.51 | 107.385 | 37.2964 | 176.994 | OK | 1518.3  | 86.7133 | 43.2909 | 130.215 | OK | 2271    | 132.195 | 66.7672 | 197.624 | OK | 0.586374 | 0.277907 | 0.886249 | 1.501468 | 1.212434 | 1.848364 |
| <b>RSc0169</b> |             | putative transmembrane oxidoreductase proteir                                    | 854.886 | 70.856  | 31.8233 | 109.461 | OK | 1225.44 | 102.067 | 44.4429 | 159.596 | OK | 742.479 | 58.4954 | 32.4762 | 84.0999 | OK | 1025.35 | 82.9397 | 14.9225 | 120.771 | OK | 0.526555 | -0.27657 | 0.227173 | 1.440485 | -1.21131 | 1.170539 |
| <b>RSc0170</b> |             | probable transmembrane protein                                                   | 735.223 | 30.7061 | 14.2103 | 47.1291 | OK | 944.837 | 39.558  | 18.0655 | 61.1507 | OK | 414.588 | 16.7617 | 10.0666 | 23.3397 | OK | 667.247 | 27.3419 | 45.7202 | 38.7379 | OK | 0.365444 | -0.87336 | -0.16741 | 1.288278 | -1.83192 | -1.12304 |
| <b>RSc0171</b> |             | short chain dehydrogenase                                                        | 512.121 | 56.9616 | 11.2115 | 102.381 | OK | 669.758 | 74.9867 | 11.9937 | 137.406 | OK | 461.27  | 48.1675 | 20.1483 | 75.9636 | OK | 607.413 | 65.6944 | 25.2069 | 105.543 | OK | 0.396645 | -0.24193 | 0.205781 | 1.316443 | -1.18257 | 1.15331  |
| <b>RSc0172</b> |             | hypothetical protein                                                             | 881.253 | 49.137  | 10.594  | 87.9306 | OK | 1444.39 | 80.8024 | 22.209  | 139.575 | OK | 565.751 | 30.347  | 12.23   | 48.4907 | OK | 897.52  | 49.0117 | 20.751  | 77.3793 | OK | 0.717588 | -0.69526 | -0.00368 | 1.644431 | -1.61917 | -1.00256 |
| <b>RSc0173</b> |             | hypothetical protein                                                             | 802.153 | 40.902  | 18.8458 | 63      | OK | 1442.55 | 73.778  | 32.675  | 114.747 | OK | 689.127 | 33.8759 | 19.6168 | 48.1057 | OK | 902.053 | 45.0749 | 25.591  | 64.3341 | OK | 0.851019 | -0.27191 | 0.140153 | 1.803775 | -1.20741 | 1.102022 |
| <b>RSc0174</b> |             | 2-dehydropantoate 2-reductase                                                    | 508.064 | 41.9482 | 19.6895 | 64.1275 | OK | 471.038 | 39.0814 | 18.5272 | 59.6154 | OK | 391.246 | 30.7097 | 17.805  | 43.5684 | OK | 296.454 | 23.8887 | 13.6235 | 34.0589 | OK | -0.10213 | -0.44991 | -0.81228 | -1.07335 | -1.36596 | -1.75599 |
| <b>RSc0175</b> |             | hypothetical protein                                                             | 1762.51 | 146.083 | 63.3722 | 228.73  | OK | 2185.91 | 182.066 | 79.3524 | 284.695 | OK | 1691.7  | 133.278 | 72.8008 | 192.828 | OK | 1350.81 | 109.266 | 58.5925 | 159.472 | OK | 0.317673 | -0.13235 | -0.41894 | 1.246319 | -1.09608 | -1.33695 |
| <b>RSc0176</b> |             | lipoprotein                                                                      | 870.098 | 75.9278 | 33.7747 | 118.14  | OK | 912.637 | 80.0517 | 35.349  | 124.652 | OK | 713.58  | 59.0757 | 32.8247 | 85.2735 | OK | 681.753 | 58.0278 | 31.6246 | 84.4264 | OK | 0.076304 | -0.36206 | -0.38788 | 1.054313 | -1.28526 | -1.30847 |
| <b>RSc0177</b> | <i>glmU</i> | UDP-N-acetylglucosamine pyrophosphorylase protein                                | 11913.6 | 636.192 | 254.214 | 1018.65 | OK | 12505.5 | 669.906 | 264.477 | 1072.31 | OK | 11710.7 | 602.233 | 323.231 | 880.665 | OK | 11706.7 | 612.433 | 326.993 | 895.805 | OK | 0.074496 | -0.07914 | -0.05491 | 1.052993 | -1.05639 | -1.03879 |
| <b>RSc0178</b> | <i>glmS</i> | D-fructose-6-phosphate amidotransferase                                          | 19240.5 | 738.881 | 272.872 | 1205.2  | OK | 17201.2 | 662.065 | 248.289 | 1073.28 | OK | 20322.6 | 756.636 | 380.879 | 1131.68 | OK | 15209.8 | 573.332 | 301.836 | 845.084 | OK | -0.15837 | 0.034257 | -0.36597 | -1.11602 | 1.02403  | -1.28875 |
| <b>RSc0179</b> |             | hypothetical protein                                                             | 3597.01 | 787.538 | 277.941 | 1136.76 | OK | 523.478 | 116.096 | 42.934  | 162.415 | OK | 604.653 | 118.782 | 56.1474 | 168.86  | OK | 1281.91 | 269.298 | 116.614 | 369.626 | OK | -2.76203 | -2.72903 | -1.54815 | -6.78351 | -6.63011 | -2.92441 |
| <b>RSc0180</b> |             | probable pseudogene (alcohol dehydrogenase c-terminal fragment) protein          | 53.7473 | 34.2708 | 7.98772 | 28.4562 | OK | 38.6399 | 25.3725 | 5.74117 | 20.7181 | OK | 33.3448 | 16.8326 | 4.92493 | 16.991  | OK | 47.1425 | 28.1667 | 7.38739 | 22.6547 | OK | -0.43371 | -1.02572 | -0.28299 | -1.35071 | -2.03598 | -1.21671 |
| <b>RSc0181</b> |             | putative zinc-containing alcohol dehydrogenase (ADH-HT). oxidoreductase protein  | 1216.92 | 193.501 | 74.8505 | 311.101 | OK | 857.437 | 137.63  | 54.4058 | 218.986 | OK | 878.081 | 128.42  | 64.54   | 181.967 | OK | 1214.83 | 186.688 | 88.5184 | 282.475 | OK | -0.49155 | -0.59147 | -0.05171 | -1.40595 | -1.50678 | -1.03649 |
| <b>RSc0182</b> |             | hypothetical protein                                                             | 2132.65 | 142.621 | 63.3133 | 221.883 | OK | 951.276 | 63.8684 | 28.6227 | 99.0344 | OK | 481.277 | 30.8104 | 17.9583 | 43.6533 | OK | 1475.92 | 96.5269 | 52.5759 | 140.221 | OK | -1.15901 | -2.2107  | -0.56318 | -2.23304 | -4.62899 | -1.47753 |
| <b>RSc0183</b> |             | hypothetical protein                                                             | 5143.52 | 595.674 | 356.016 | 1607.44 | OK | 2114.15 | 409.758 | 149.105 | 616.594 | OK | 1371.58 | 238.473 | 113.54  | 362.436 | OK | 4694.3  | 865.921 | 385.527 | 1259.41 | OK | -1.26634 | -2.04728 | -0.18688 | -2.4055  | -4.13327 | -1.1383  |
| <b>RSc0184</b> |             | hypothetical protein                                                             | 2962.19 | 562.64  | 209.4   | 851.738 | OK | 1931.99 | 371.107 | 134.586 | 561.613 | OK | 1800.62 | 310.519 | 149.255 | 440.536 | OK | 4504.83 | 823.794 | 368.001 | 1202.54 | OK | -0.60038 | -0.85753 | 0.550071 | -1.51611 | -1.81193 | 1.464158 |
| <b>RSc0185</b> |             | hypothetical protein                                                             | 2937.85 | 279.054 | 121.059 | 436.47  | OK | 2107.71 | 201.33  | 86.328  | 316.408 | OK | 1179.3  | 105.912 | 57.1784 | 154.215 | OK | 4425.95 | 409.647 | 213.814 | 600.979 | OK | -0.47098 | -1.39768 | 0.553837 | -1.38605 | -2.63477 | 1.467985 |
| <b>RSc0186</b> |             | hypothetical protein                                                             | 1987.64 | 260.171 | 105.562 | 413.289 | OK | 1669.79 | 220.267 | 88.4283 | 351.744 | OK | 775.823 | 94.532  | 50.0287 | 137.652 | OK | 2766.9  | 351.28  | 175.635 | 518.647 | OK | -0.24021 | -1.46059 | 0.433161 | -1.18116 | -2.7522  | 1.350189 |
| <b>RSc0187</b> |             | hypothetical protein                                                             | 2495.7  | 435.534 | 165.672 | 679.303 | OK | 1609.99 | 283.883 | 105.273 | 444.136 | OK | 791.384 | 126.199 | 62.5744 | 178.152 | OK | 2870.25 | 483.16  | 223.617 | 718.828 | OK | -0.61749 | -1.78708 | 0.149716 | -1.5342  | -3.45117 | 1.109351 |
| <b>RSc0188</b> |             | hypothetical protein                                                             | 115.607 | 186.919 | 24.2369 | 82.4056 | OK | 93.8397 | 158.716 | 19.7358 | 68.9021 | OK | 31.1219 | 34.623  | 6.48979 | 21.1772 | OK | 95.1915 | 143.624 | 21.5188 | 63.19   | OK | -0.23597 | -2.43261 | -0.38012 | -1.17769 | -5.39869 | -1.30145 |
| <b>RSc0189</b> |             | hypothetical protein                                                             | 3016.95 | 399.778 | 163.09  | 633.575 | OK | 2527.23 | 337.522 | 136.852 | 536.874 | OK | 1108.16 | 136.598 | 70.7867 | 202.066 | OK | 3106.87 | 399.228 | 198.144 | 590.805 | OK | -0.24422 | -1.54926 | -0.00199 | -1.18445 | -2.92668 | -1.00138 |
| <b>RSc0190</b> |             | transcription regulator protein                                                  | 332.625 | 33.523  | 15.8389 | 51.0545 | OK | 276.919 | 28.0756 | 13.1857 | 42.934  | OK | 113.372 | 10.776  | 6.02797 | 15.4665 | OK | 220.3   | 21.6183 | 11.8973 | 31.3296 | OK | -0.25583 | -1.63733 | -0.6329  | -1.19403 | -3.11089 | -1.55068 |
| <b>RSc0191</b> |             | transmembrane two component system sensor kinase transcription regulator protein | 821.421 | 43.5392 | 20.1575 | 66.9265 | OK | 711.157 | 37.8128 | 17.5852 | 58.0404 | OK | 559.082 | 28.5433 | 16.748  | 40.3243 | OK | 1037.13 | 53.8581 | 30.2663 | 77.1884 | OK | -0.20344 | -0.60916 | 0.306848 | -1.15144 | -1.52537 | 1.237003 |
| <b>RSc0192</b> |             | response regulator transcription regulator proteir                               | 1188.53 | 157.492 | 64.0034 | 251.045 | OK | 413.078 | 55.1683 | 24.1504 | 84.6754 | OK | 351.232 | 43.2949 | 23.4322 | 62.9433 | OK | 739.774 | 95.0599 | 47.8448 | 136.475 | OK | -1.51337 | -1.86301 | -0.72837 | -2.85476 | -3.63766 | -1.65677 |
| <b>RSc0193</b> |             | hypothetical conserved protein                                                   | 5180.02 | 1001.6  | 361.426 | 1629.15 | OK | 1081    | 211.421 | 77.021  | 318.882 | OK | 640.221 | 112.235 | 54.5473 | 166.337 | OK | 1780.53 | 331.327 | 149.396 | 475.011 | OK | -2.24412 | -3.15771 | -1.59598 | -4.73747 | -8.92413 | -3.023   |
| <b>RSc0194</b> |             | zinc-dependent alcohol dehydrogenase oxidoreductase proteir                      | 6991.21 | 513.97  | 217.896 | 809.79  | OK | 1204.28 | 88.9197 | 38.9632 | 138.729 | OK | 1231.54 | 86.4162 | 47.7405 | 124.737 | OK | 2182.15 | 156.754 | 85.5657 | 227.992 | OK | -2.53111 | -2.57231 | -1.71318 | -5.78016 | -5.94761 | -3.27883 |
| <b>RSc0195</b> |             | hypothetical protein                                                             | 4870.72 | 185.389 | 81.1091 | 289.561 | OK | 1032.24 | 39.3773 | 17.785  | 61.0663 | OK | 666.897 | 24.6131 | 14.5293 | 34.6785 | OK | 1565.67 | 58.4973 | 33.0337 | 83.7493 | OK | -2.23512 | -2.91306 | -1.66411 | -4.70802 | -7.53213 | -3.16919 |
| <b>RSc0196</b> |             | putative cytochrome c1 signal peptide proteir                                    | 401.584 | 21.9358 | 10.8536 | 32.9929 | OK | 368.919 | 20.2166 | 10.1332 | 30.2555 | OK | 267.87  | 14.0832 | 8.48035 | 19.6138 | OK | 373.513 | 19.9845 | 11.8441 | 28.1415 | OK | -0.11775 | -0.63931 | -0.13441 | -1.08504 | -1.55759 | -1.09764 |
| <b>RSc0197</b> |             | putative cytochrome C signal peptide proteir                                     | 555.727 | 77.9713 | 33.1857 | 120.402 | OK | 563.958 | 79.7862 | 33.7042 | 125.38  | OK | 193.4   | 25.1575 | 13.5043 | 36.4207 | OK | 580.215 | 78.8635 | 36.6495 | 110.387 | OK | 0.033196 | -1.63195 | 0.016485 | 1.023277 | -3.09933 | 1.011443 |
| <b>RSc0198</b> |             | hypothetical protein                                                             | 1490.73 | 200.006 | 80.1501 | 318.093 | OK | 1465.55 | 198.197 | 78.7458 | 317.591 | OK | 1001.46 | 124.899 | 64.8181 | 184.064 | OK | 2679.87 | 348.59  | 173.574 | 511.815 | OK | -0.01311 | -0.67928 | 0.801488 | -1.00913 | -1.60134 | 1.742898 |
| <b>RSc0199</b> |             | cytochrome B561 cytochrome transmembrane proteir                                 | 1046.55 | 185.654 | 70.5344 | 290.97  | OK | 848.237 | 152.062 | 58.1449 | 233.806 | OK | 790.273 | 127.948 | 63.2896 | 192.168 | OK | 1659.05 | 283.786 | 131.057 | 417.251 | OK | -0.28796 | -0.53706 | 0.612187 | -1.22091 | -1.45101 | 1.528575 |
| <b>RSc0200</b> |             | putative small HEAT shock protein                                                | 16447.7 | 4054.09 | 1210.22 | 6522.62 | OK | 12040   | 3010.62 | 911.814 | 4702.03 | OK | 8176.16 | 1788.7  | 781.604 | 2427.27 | OK | 23115.2 | 5450.34 | 2069.66 | 7287.36 | OK | -0.42932 | -1.18047 | 0.426968 | -1.3466  | -2.2665  | 1.344405 |
| <b>RSc0201</b> |             | hypothetical protein                                                             | 22351.8 | 1202.56 | 441.661 | 1964.82 | OK | 14666.6 | 791.599 | 309.684 | 1273.47 | OK | 7891.61 | 408.811 | 225.516 | 591.279 | OK | 32968.9 | 1737.63 | 813.756 | 2661.5  | OK | -0.60327 | -1.5566  | 0.531012 | -1.51915 | -2.9416  | 1.444942 |
| <b>RSc0202</b> |             | phosphoribosylpyrophosphate synthetase                                           | 3504.73 | 281.781 | 124.99  | 436.362 | OK | 2334.95 | 188.625 | 82.7248 | 294.319 | OK | 691.35  | 52.893  | 29.6877 | 75.9344 | OK | 3466.78 | 272.111 | 145.667 | 397.353 | OK | -0.57905 | -2.41343 | -0.05038 | -1.49387 | -5.32738 | -1.03554 |
| <b>RSc0203</b> |             | hypothetical protein                                                             | 1289.94 | 1161.89 | 199.786 | 840.075 | OK | 704.717 | 657.574 | 113.918 | 449.662 | OK | 393.469 | 266.991 | 75.3908 | 219.678 | OK | 1111.47 | 935.319 | 204.713 | 648.587 | OK | -0.82125 | -2.12161 | -0.31294 | -1.76693 | -4.35179 | -1.24224 |
| <b>RSc0204</b> | <i>deoA</i> | thymidine phosphorylase                                                          | 8283.17 | 391.661 | 162.989 | 619.289 | OK | 5461.1  | 258.944 | 113.082 | 404.323 | OK | 2135.18 | 97.4926 | 55.2358 | 139.611 | OK | 6738.65 | 312.4   | 172.211 | 452.392 | OK | -0.59697 | -2.00624 | -0.32621 | -1.51253 | -4.01734 | -1.25372 |
| <b>RSc0205</b> |             | transcription regulator protein                                                  | 939.057 | 81.6136 | 36.23   | 126.948 | OK | 1322.04 | 115     |         |         |    |         |         |         |         |    |         |         |         |         |    |          |          |          |          |          |          |

|                |              |                                                                  |         |         |         |         |    |         |         |         |         |    |         |         |         |         |    |         |         |         |         |    |          |          |          |          |          |          |
|----------------|--------------|------------------------------------------------------------------|---------|---------|---------|---------|----|---------|---------|---------|---------|----|---------|---------|---------|---------|----|---------|---------|---------|---------|----|----------|----------|----------|----------|----------|----------|
| <b>RSc0246</b> |              | putative calcium binding hemolysin protein                       | 28175.8 | 548.366 | 184.241 | 912.19  | OK | 3114.19 | 60.679  | 26.625  | 94.6811 | OK | 4172.55 | 79.4059 | 44.9901 | 114.013 | OK | 3432.33 | 65.7324 | 37.3026 | 94.0802 | OK | -3.17587 | -2.78782 | -3.06046 | -9.03716 | -6.90586 | -8.3424  |
| <b>RSc0249</b> |              | putative calcium binding hemolysin protein                       | 5169.88 | 76.7508 | 32.1719 | 121.403 | OK | 538.198 | 7.99696 | 3.77819 | 12.2076 | OK | 710.245 | 10.3318 | 6.04256 | 14.6123 | OK | 541.232 | 7.91119 | 4.75781 | 11.0545 | OK | -3.26266 | -2.89309 | -3.27822 | -9.5975  | -7.4286  | -9.70155 |
| <b>RSc0253</b> |              | hypothetical protein                                             | 2827.31 | 261.601 | 113.49  | 408.023 | OK | 850.997 | 79.1741 | 35.0528 | 122.872 | OK | 696.907 | 61.0359 | 33.8391 | 87.8187 | OK | 702.604 | 63.3683 | 34.2093 | 92.4836 | OK | -1.72431 | -2.09968 | -2.04558 | -3.30422 | -4.28615 | -4.12839 |
| <b>RSc0254</b> |              | hypothetical protein                                             | 3328.28 | 146.11  | 65.4289 | 226.293 | OK | 1914.51 | 84.2645 | 37.5969 | 130.858 | OK | 1508.3  | 64.0366 | 36.1923 | 91.7679 | OK | 1375.29 | 59.2202 | 33.3843 | 84.9428 | OK | -0.79406 | -1.19009 | -1.30289 | -1.73394 | -2.28166 | -2.46723 |
| <b>RSc0255</b> |              | hypothetical protein                                             | 2820.21 | 220.953 | 98.1068 | 343.406 | OK | 1378.15 | 108.474 | 47.0572 | 169.642 | OK | 1304.89 | 97.3711 | 53.3304 | 141.267 | OK | 1554.79 | 118.951 | 63.919  | 174.066 | OK | -1.02639 | -1.18217 | -0.89337 | -2.03692 | -2.26918 | -1.85751 |
| <b>RSc0256</b> | <i>dehH</i>  | haloacetate dehalogenase H-1 protein                             | 423.894 | 35.6849 | 17.0208 | 54.3275 | OK | 370.759 | 31.3675 | 15.0755 | 47.6581 | OK | 402.361 | 32.1784 | 18.4358 | 45.9182 | OK | 470.518 | 38.6504 | 21.3828 | 54.485  | OK | -0.18604 | -0.14922 | 0.11517  | -1.13764 | -1.10897 | 1.083102 |
| <b>RSc0257</b> | <i>ripY</i>  | Type III effector protein with ankyrin repeats                   | 1716.87 | 42.9057 | 18.4571 | 67.3636 | OK | 3128.91 | 78.3088 | 34.587  | 122.03  | OK | 6014.3  | 146.6   | 81.879  | 211.354 | OK | 3320.82 | 81.6029 | 46.3904 | 116.741 | OK | 0.868005 | 1.772644 | 0.927451 | 1.825137 | 3.416795 | 1.901913 |
| <b>RSc0258</b> |              | putative beta lactamase protein                                  | 497.923 | 40.1836 | 16.5698 | 63.7972 | OK | 481.158 | 39.0163 | 16.3015 | 61.7176 | OK | 469.051 | 36.0157 | 19.5889 | 52.3474 | OK | 423.376 | 33.3547 | 17.8021 | 48.7737 | OK | -0.04253 | -0.15798 | -0.26872 | -1.02992 | -1.11572 | -1.20474 |
| <b>RSc0259</b> |              | hypothetical protein                                             | 165.298 | 97.3762 | 3.53456 | 210.896 | OK | 151.799 | 91.9656 | 2.42335 | 200.532 | OK | 117.818 | 55.5517 | 4.24352 | 107.031 | OK | 109.697 | 60.6178 | 7.18372 | 115.492 | OK | -0.08247 | -0.80974 | -0.68383 | -1.05883 | -1.75289 | -1.6064  |
| <b>RSc0260</b> |              | hypothetical protein                                             | 920.803 | 168.926 | 64.0244 | 261.245 | OK | 857.437 | 159.017 | 60.1327 | 242.037 | OK | 748.036 | 124.93  | 60.9309 | 188.737 | OK | 888.454 | 157.047 | 72.4483 | 225.89  | OK | -0.08721 | -0.43527 | -0.1052  | -1.06231 | -1.35217 | -1.07564 |
| <b>RSc0261</b> |              | hydroxymethylglutaryl-CoA lyase                                  | 2611.31 | 218.971 | 96.463  | 340.702 | OK | 2502.39 | 210.88  | 92.6543 | 329.068 | OK | 2650.92 | 211.207 | 115.996 | 303.585 | OK | 3547.47 | 290.278 | 154.389 | 424.774 | OK | -0.05432 | -0.05208 | 0.406695 | -1.03837 | -1.03676 | 1.325646 |
| <b>RSc0262</b> |              | putative 2-hydroxyacid dehydrogenase oxidoreductase protein      | 1755.41 | 144.935 | 62.8969 | 226.908 | OK | 1723.15 | 142.968 | 61.9398 | 222.6   | OK | 1419.38 | 111.41  | 60.699  | 161.796 | OK | 1748.8  | 140.921 | 75.8737 | 205.972 | OK | -0.01971 | -0.37953 | -0.04052 | -1.01376 | -1.30092 | -1.02848 |
| <b>RSc0263</b> |              | hypothetical conserved protein                                   | 380.288 | 104.454 | 36.7541 | 140.837 | OK | 425.038 | 118.61  | 40.6572 | 148.155 | OK | 534.629 | 128.949 | 57.4351 | 171.664 | OK | 494.089 | 129.458 | 53.2639 | 158.348 | OK | 0.183358 | 0.303933 | 0.309616 | 1.135524 | 1.234505 | 1.239378 |
| <b>RSc0264</b> |              | hypothetical protein                                             | 840.689 | 385.31  | 100.895 | 405.726 | OK | 912.637 | 428.342 | 108.838 | 441.576 | OK | 1132.61 | 429.544 | 156.499 | 495.97  | OK | 1152.27 | 497.568 | 158.829 | 505.711 | OK | 0.152744 | 0.156786 | 0.368874 | 1.111682 | 1.114801 | 1.291345 |
| <b>RSc0265</b> |              | acyl-CoA carboxylase subunit alpha                               | 1823.35 | 59.3957 | 26.1638 | 92.6423 | OK | 1828.03 | 59.6628 | 26.1939 | 93.124  | OK | 1032.58 | 32.696  | 18.9199 | 46.4829 | OK | 1106.03 | 35.3922 | 20.3753 | 50.3738 | OK | 0.006473 | -0.86124 | -0.74693 | 1.004497 | -1.8166  | -1.67821 |
| <b>RSc0266</b> | <i>bioB</i>  | biotin synthase protein                                          | 3141.68 | 219.681 | 98.5341 | 339.488 | OK | 5496.98 | 385.965 | 167.395 | 604.465 | OK | 3347.82 | 223.792 | 124.247 | 322.058 | OK | 3540.22 | 241.997 | 131.346 | 351.565 | OK | 0.81306  | 0.026748 | 0.139579 | 1.756934 | 1.018716 | 1.101584 |
| <b>RSc0267</b> |              | enoyl-CoA hydratase                                              | 1330.5  | 135.363 | 43.501  | 226.902 | OK | 1025.8  | 104.993 | 30.5398 | 179.189 | OK | 940.325 | 90.1872 | 42.0347 | 138.251 | OK | 947.382 | 93.8374 | 43.1535 | 144.245 | OK | -0.36654 | -0.58584 | -0.5286  | -1.28926 | -1.50091 | -1.44253 |
| <b>RSc0268</b> |              | putative signal peptide protein                                  | 985.705 | 82.9803 | 5.21939 | 161.128 | OK | 850.077 | 71.9195 | 6.51447 | 137.481 | OK | 665.785 | 53.2455 | 17.3544 | 89.171  | OK | 732.521 | 60.1724 | 20.3718 | 100.134 | OK | -0.20639 | -0.64011 | -0.46367 | -1.15379 | -1.55845 | -1.37904 |
| <b>RSc0269</b> |              | putative propionyl-CoA carboxylase (beta subunit) protein        | 2339.53 | 104.196 | 46.8589 | 161.523 | OK | 2042.39 | 91.2018 | 40.7312 | 141.418 | OK | 1625.01 | 69.9735 | 39.5887 | 100.157 | OK | 1801.39 | 78.688  | 44.4484 | 112.8   | OK | -0.19217 | -0.57442 | -0.40508 | -1.14248 | -1.48908 | -1.32417 |
| <b>RSc0270</b> |              | hypothetical protein                                             | 197.75  | 46.6116 | 1.33243 | 91.6419 | OK | 186.759 | 44.6324 | 1.18439 | 87.9407 | OK | 148.94  | 31.2907 | 3.79729 | 58.5659 | OK | 174.971 | 39.4986 | 7.01038 | 71.8564 | OK | -0.0626  | -0.57496 | -0.23889 | -1.04434 | -1.48963 | -1.18008 |
| <b>RSc0271</b> |              | hypothetical protein                                             | 683.503 | 83.3671 | 21.3737 | 145.229 | OK | 672.518 | 82.6212 | 22.4003 | 142.896 | OK | 597.984 | 68.1569 | 30.0164 | 105.978 | OK | 513.128 | 60.7735 | 24.676  | 96.8627 | OK | -0.01297 | -0.29062 | -0.45604 | -1.00903 | -1.22316 | -1.37177 |
| <b>RSc0272</b> |              | hypothetical protein                                             | 533.417 | 129.994 | 7.7984  | 255.398 | OK | 509.678 | 125.988 | 6.92134 | 249.415 | OK | 413.476 | 89.5314 | 22.9525 | 156.337 | OK | 401.618 | 93.6555 | 26.8175 | 160.439 | OK | -0.04516 | -0.53798 | -0.47301 | -1.0318  | -1.45194 | -1.388   |
| <b>RSc0273</b> |              | putative 2-hydroxychromene-2-carboxylate isomerase protein       | 733.194 | 106.346 | 43.7842 | 165.891 | OK | 712.077 | 104.174 | 42.7214 | 164.935 | OK | 583.535 | 78.3115 | 40.8867 | 113.854 | OK | 582.935 | 81.8602 | 40.7818 | 122.87  | OK | -0.02977 | -0.44147 | -0.37753 | -1.02085 | -1.35799 | -1.29912 |
| <b>RSc0274</b> |              | putative acyl CoA dehydrogenase oxidoreductase protein           | 1898.4  | 126.169 | 55.6889 | 196.506 | OK | 1377.23 | 91.8923 | 40.1439 | 143.739 | OK | 1110.38 | 70.6572 | 39.5457 | 101.617 | OK | 1262.87 | 82.0863 | 45.1069 | 118.862 | OK | -0.45734 | -0.83645 | -0.62014 | -1.37301 | -1.78565 | -1.53703 |
| <b>RSc0275</b> |              | short chain dehydrogenase                                        | 1267.63 | 148.698 | 61.5931 | 234.959 | OK | 898.837 | 106.172 | 45.0173 | 167.116 | OK | 680.235 | 74.7167 | 40.2099 | 108.835 | OK | 670.874 | 76.4631 | 39.6737 | 112.498 | OK | -0.48598 | -0.99288 | -0.95955 | -1.40054 | -1.99016 | -1.9447  |
| <b>RSc0276</b> | <i>atoB</i>  | acetyl-CoA acetyltransferase                                     | 2961.17 | 186.962 | 84.07   | 289.586 | OK | 1953.15 | 123.779 | 54.5937 | 192.658 | OK | 1726.15 | 104.502 | 58.3717 | 149.853 | OK | 1718.89 | 106.186 | 58.6404 | 153.454 | OK | -0.59498 | -0.83921 | -0.81615 | -1.51045 | -1.78908 | -1.7607  |
| <b>RSc0277</b> |              | carbonic anhydrase protein                                       | 1937.95 | 240.471 | 98.7293 | 381.867 | OK | 2204.31 | 275.538 | 112.442 | 434.352 | OK | 1880.65 | 217.87  | 114.189 | 319.151 | OK | 2341.71 | 282.079 | 143.016 | 409.457 | OK | 0.196388 | -0.1424  | 0.230236 | 1.145826 | -1.10374 | 1.173027 |
| <b>RSc0278</b> | <i>aceK</i>  | bifunctional isocitrate dehydrogenase kinase/phosphatase protein | 3299.88 | 127.637 | 56.7166 | 198.385 | OK | 3098.55 | 120.123 | 54.3901 | 185.871 | OK | 2354.15 | 88.2686 | 50.1785 | 126.229 | OK | 3268.24 | 124.08  | 70.382  | 177.763 | OK | -0.08753 | -0.53207 | -0.04078 | -1.06255 | -1.44601 | -1.02867 |
| <b>RSc0279</b> |              | acyl-CoA dehydrogenase oxidoreductase protein                    | 2279.7  | 143.935 | 63.9651 | 223.388 | OK | 1678.99 | 106.404 | 46.7479 | 165.797 | OK | 2097.39 | 126.977 | 71.0565 | 182.855 | OK | 1994.49 | 123.212 | 67.724  | 178.555 | OK | -0.43587 | -0.18085 | -0.22427 | -1.35272 | -1.13355 | -1.16819 |
| <b>RSc0280</b> |              | putative transcription regulator protein                         | 489.81  | 93.8645 | 36.9853 | 136.432 | OK | 477.478 | 92.5433 | 35.9508 | 142.122 | OK | 606.876 | 105.016 | 51.6673 | 155.257 | OK | 638.236 | 117.73  | 53.9636 | 164.697 | OK | -0.02045 | 0.16881  | 0.32683  | -1.01428 | 1.124131 | 1.254255 |
| <b>RSc0281</b> |              | hypothetical protein                                             | 2146.85 | 150.608 | 66.6669 | 234.229 | OK | 2150.03 | 151.458 | 67.2036 | 235.302 | OK | 999.234 | 60.0073 | 37.4131 | 96.121  | OK | 2117.78 | 145.233 | 79.2968 | 209.419 | OK | 0.008119 | -1.16841 | -0.05243 | 1.005644 | -2.24764 | -1.03701 |
| <b>RSc0282</b> |              | hypothetical protein                                             | 749.42  | 216.835 | 70.6063 | 280.916 | OK | 705.637 | 207.579 | 66.7489 | 263.809 | OK | 320.11  | 80.8934 | 36.2329 | 97.9445 | OK | 707.137 | 194.906 | 77.4291 | 237.582 | OK | -0.06294 | -1.4225  | -0.15382 | -1.04459 | -2.6805  | -1.11251 |
| <b>RSc0283</b> |              | hypothetical protein                                             | 703.785 | 66.2633 | 18.6504 | 113.806 | OK | 1025.8  | 97.1206 | 28.3182 | 165.722 | OK | 725.806 | 64.6361 | 28.5367 | 100.704 | OK | 706.23  | 64.7992 | 28.6117 | 100.93  | OK | 0.551567 | -0.03587 | -0.03223 | 1.465677 | -1.02517 | 1.02259  |
| <b>RSc0284</b> |              | short chain dehydrogenase                                        | 626.714 | 63.1622 | 7.96187 | 118.924 | OK | 860.197 | 87.2115 | 10.4427 | 164.751 | OK | 668.008 | 63.9941 | 23.5724 | 103.414 | OK | 652.742 | 64.0543 | 23.7478 | 104.804 | OK | 0.465457 | 0.007561 | 0.020234 | 1.380755 | 1.005255 | 1.014124 |
| <b>RSc0285</b> | <i>dsbA1</i> | thiol:disulfide interchange signal peptide protein               | 14115.3 | 1836.42 | 668.81  | 2999.6  | OK | 15929.7 | 2088.5  | 746.738 | 3428.94 | OK | 16511.3 | 2000.34 | 972.797 | 3023.6  | OK | 16615.9 | 2096.95 | 990.493 | 3202.59 | OK | 0.185571 | 0.123349 | 0.191396 | 1.137267 | 1.089261 | 1.141868 |
| <b>RSc0286</b> |              | hypothetical protein                                             | 2208.71 | 256.291 | 106.796 | 403.562 | OK | 2691.91 | 314.512 | 130.149 | 498.232 | OK | 2674.26 | 290.724 | 154.354 | 426.202 | OK | 2702.53 | 304.742 | 156.481 | 449.506 | OK | 0.295332 | 0.181867 | 0.249806 | 1.227168 | 1.134351 | 1.189047 |
| <b>RSc0287</b> | <i>argS</i>  | arginyl-tRNA synthetase                                          | 3417.52 | 134.12  | 60.5076 | 207.562 | OK | 5226.5  | 205.589 | 89.797  | 321.505 | OK | 2431.95 | 92.4961 | 52.714  | 132.137 | OK | 2950.03 | 113.628 | 64.4125 | 162.758 | OK | 0.616239 | -0.53606 | -0.23921 | 1.532874 | -1.45001 | -1.18034 |
| <b>RSc0288</b> |              | hypothetical protein                                             | 4259.22 | 1737.63 | 468.629 | 1936.69 | OK | 3418.71 | 1425.53 | 379.723 | 158.446 | OK | 5929.82 | 2031.28 | 756.985 | 2513.49 | OK | 4474    | 1723.98 | 756.979 | 1882.57 | OK | -0.28562 | 0.225268 | -0.01138 | -1.21894 | 1.168995 | -1.00792 |
| <b>RSc0289</b> | <i>vsrA</i>  |                                                                  |         |         |         |         |    |         |         |         |         |    |         |         |         |         |    |         |         |         |         |    |          |          |          |          |          |          |

|         |             |                                                                                                         |         |         |         |         |    |         |         |         |         |    |         |         |         |         |    |         |         |         |         |    |          |          |          |          |          |          |
|---------|-------------|---------------------------------------------------------------------------------------------------------|---------|---------|---------|---------|----|---------|---------|---------|---------|----|---------|---------|---------|---------|----|---------|---------|---------|---------|----|----------|----------|----------|----------|----------|----------|
| RSc0334 |             | hypothetical protein                                                                                    | 2329.39 | 423.72  | 158.631 | 653.87  | OK | 880.437 | 161.886 | 61.156  | 247.245 | OK | 895.865 | 148.449 | 72.6427 | 223.592 | OK | 873.949 | 153.204 | 70.6727 | 218.544 | OK | -1.38813 | -1.51314 | -1.46766 | -2.6174  | -2.85431 | -2.76572 |
| RSc0335 |             | putative transmembrane protein                                                                          | 1347.74 | 212.727 | 81.5746 | 338.388 | OK | 866.637 | 138.075 | 54.5714 | 220.206 | OK | 681.346 | 98.9637 | 50.268  | 142.556 | OK | 603.786 | 92.1185 | 45.0294 | 135.534 | OK | -0.62355 | -1.10403 | -1.20744 | -1.54066 | -2.14955 | -2.30928 |
| RSc0336 |             | signal peptide protein                                                                                  | 5295.63 | 1103.32 | 387.637 | 1780.53 | OK | 1906.23 | 402.06  | 140.971 | 589.727 | OK | 2008.47 | 377.069 | 176.701 | 565.58  | OK | 2161.3  | 432.586 | 190.999 | 606.18  | OK | -1.45637 | -1.54895 | -1.35079 | -2.74417 | -2.92604 | -2.55052 |
| RSc0337 |             | polyphenol oxidase B precursor                                                                          | 40658.3 | 1970.22 | 688.931 | 3250.46 | OK | 4705.78 | 228.686 | 101.806 | 354.961 | OK | 5938.72 | 277.75  | 153.141 | 401.813 | OK | 7554.58 | 358.867 | 194.941 | 522.314 | OK | -3.10692 | -2.8265  | -2.45684 | -8.61539 | -7.0935  | -5.49011 |
| RSc0338 |             | Mg(2+) chelatase family protein                                                                         | 208.905 | 9.81299 | 4.99916 | 14.6194 | OK | 205.159 | 9.66382 | 4.95715 | 14.4094 | OK | 172.282 | 7.81584 | 4.72446 | 10.858  | OK | 187.663 | 8.64319 | 5.18033 | 12.0598 | OK | -0.0221  | -0.32829 | -0.18313 | -1.01544 | -1.25553 | -1.13534 |
| RSc0339 |             | hypothetical protein                                                                                    | 572.967 | 104.224 | 41.0619 | 157.633 | OK | 425.958 | 78.3209 | 31.4516 | 113.825 | OK | 691.35  | 114.56  | 56.2673 | 172.742 | OK | 545.765 | 95.673  | 45.0631 | 134.574 | OK | -0.41222 | 0.136416 | -0.1235  | -1.33073 | 1.099171 | -1.08938 |
| RSc0340 |             | hypothetical protein                                                                                    | 1835.52 | 1109.55 | 241.992 | 1014.07 | OK | 1859.31 | 1156.39 | 245.163 | 1027    | OK | 2945.46 | 1420.05 | 460.363 | 1486.98 | OK | 2096.03 | 1188.09 | 329.69  | 1050.68 | OK | 0.059653 | 0.355967 | 0.098669 | 1.042215 | 1.279843 | 1.070785 |
| RSc0341 |             | signal peptide protein                                                                                  | 425.922 | 42.5264 | 19.9507 | 64.7202 | OK | 503.238 | 50.5436 | 23.1429 | 77.6483 | OK | 273.428 | 25.758  | 14.7217 | 36.6862 | OK | 509.501 | 49.5389 | 27.0029 | 71.0893 | OK | 0.24917  | -0.72334 | 0.220203 | 1.188523 | -1.651   | 1.164898 |
| RSc0342 | <i>glnK</i> | nitrogen regulatory P-II transcription regulator protein                                                | 414.767 | 149.815 | 46.3535 | 180.285 | OK | 316.479 | 116.611 | 36.0949 | 131.082 | OK | 332.337 | 102.28  | 42.5418 | 115.444 | OK | 366.261 | 125.313 | 46.852  | 126.876 | OK | -0.36148 | -0.55066 | -0.25765 | -1.28474 | -1.46475 | -1.19553 |
| RSc0343 | <i>amtB</i> | ammonium transporter                                                                                    | 6828.95 | 382.758 | 143.434 | 602.009 | OK | 2595.31 | 145.948 | 65.8256 | 226.067 | OK | 3091.07 | 166.65  | 93.5286 | 239.443 | OK | 3062.45 | 168.101 | 93.5286 | 242.011 | OK | -1.39098 | -1.19961 | -1.17871 | -2.62256 | -2.29678 | -2.27695 |
| RSc0344 | <i>gshA</i> | Glutamate--cysteine ligase GshA                                                                         | 5182.05 | 294.292 | 129.2   | 459.056 | OK | 7339.73 | 418.229 | 178.444 | 657.973 | OK | 8547.39 | 466.76  | 254.666 | 678.651 | OK | 4664.38 | 259.394 | 143.24  | 375.111 | OK | 0.507045 | 0.665433 | -0.1821  | 1.421136 | 1.586044 | -1.13454 |
| RSc0345 | <i>gshB</i> | glutathione synthetase                                                                                  | 2928.72 | 231.994 | 103.108 | 359.457 | OK | 3721.39 | 296.167 | 130.189 | 458.469 | OK | 4265.92 | 321.723 | 175.217 | 467.723 | OK | 2807.7  | 217.159 | 117.094 | 316.615 | OK | 0.352323 | 0.471732 | -0.09534 | 1.276615 | 1.386773 | -1.06831 |
| RSc0346 |             | hypothetical protein                                                                                    | 2213.78 | 409.626 | 142.566 | 675.2   | OK | 2652.35 | 496.176 | 172.494 | 810.442 | OK | 2664.25 | 448.497 | 208.533 | 674.058 | OK | 3188.46 | 568.349 | 251.76  | 800.747 | OK | 0.276545 | 0.130791 | 0.47247  | 1.21129  | 1.094894 | 1.387483 |
| RSc0347 | <i>pstH</i> | phosphohistidinoprotein-hexosephosphotransferase                                                        | 691.616 | 397.273 | 5.16971 | 898.381 | OK | 860.197 | 507.931 | 5.90482 | 1143.76 | OK | 784.715 | 362.018 | 40.1363 | 703.077 | OK | 766.065 | 412.926 | 25.8731 | 837.102 | OK | 0.354502 | -0.13407 | 0.055753 | 1.278544 | -1.09738 | 1.039401 |
| RSc0348 | <i>ptsI</i> | phosphoenolpyruvate-protein phosphotransferase transmembran                                             | 4566.49 | 183.918 | 81.2966 | 285.873 | OK | 6015.86 | 242.869 | 104.153 | 381.286 | OK | 5349.62 | 208.714 | 116.601 | 300.594 | OK | 5955.36 | 235.38  | 130.671 | 339.629 | OK | 0.401116 | 0.182465 | 0.355929 | 1.320529 | 1.134821 | 1.279809 |
| RSc0349 | <i>bfd</i>  | putative bacterioferritin-associated ferredoxin proteir                                                 | 805.195 | 440.45  | 105.002 | 421.873 | OK | 798.557 | 448.663 | 103.602 | 419.306 | OK | 4906.14 | 2169.7  | 727.621 | 2381.74 | OK | 523.1   | 268.718 | 80.7956 | 240.545 | OK | 0.026654 | 2.300445 | -0.71289 | 1.018647 | 4.926098 | 1.63908  |
| RSc0350 | <i>bfr</i>  | bacterioferritin                                                                                        | 5142.5  | 1041.16 | 370.306 | 1694.42 | OK | 7504.41 | 1537.61 | 523.661 | 2519.15 | OK | 2150.74 | 393.318 | 186.492 | 592.035 | OK | 5368.8  | 1044.95 | 457.427 | 1500.01 | OK | 0.562498 | -1.40442 | 0.005242 | 1.476824 | -2.64712 | 1.00364  |
| RSc0351 | <i>thiF</i> | molybdopterin biosynthesis protein MoeE                                                                 | 825.477 | 90.4099 | 39.3275 | 141.167 | OK | 1098.48 | 121.092 | 51.0914 | 190.799 | OK | 754.705 | 77.6601 | 41.7614 | 113.086 | OK | 799.609 | 85.1763 | 44.8957 | 124.183 | OK | 0.421551 | -0.21931 | -0.08603 | 1.339367 | -1.16417 | -1.06144 |
| RSc0352 |             | putative carboxy-terminal processing protease transmembran                                              | 21863   | 946.231 | 342.301 | 1549.84 | OK | 22912.5 | 994.192 | 360.528 | 1629.19 | OK | 25845.6 | 1082.12 | 527.774 | 1635.61 | OK | 25126.9 | 1066.79 | 522.646 | 1610.89 | OK | 0.071332 | 0.193596 | 0.173012 | 1.050686 | 1.143611 | 1.12741  |
| RSc0353 | <i>gpmA</i> | phosphoglyceromutase                                                                                    | 4364.69 | 437.831 | 185.513 | 689.507 | OK | 4127.1  | 416.462 | 176.061 | 655.705 | OK | 5278.49 | 499.478 | 263.451 | 735.038 | OK | 3092.36 | 302.058 | 158.355 | 445.511 | OK | -0.07219 | 0.190047 | -0.53555 | -1.05131 | 1.140801 | -1.44949 |
| RSc0354 |             | hypothetical protein                                                                                    | 723.053 | 158.307 | 57.6219 | 227.804 | OK | 862.957 | 191.385 | 67.9317 | 273.987 | OK | 712.468 | 139.962 | 65.3428 | 201.741 | OK | 507.688 | 106.653 | 47.5094 | 140.996 | OK | 0.273753 | -0.17769 | -0.5698  | 1.208948 | -1.13107 | -1.48432 |
| RSc0355 | <i>grxC</i> | glutaredoxin 3 (GRX3) protein                                                                           | 958.325 | 611.055 | 132.546 | 540.17  | OK | 1019.36 | 669.35  | 139.785 | 576.863 | OK | 1013.68 | 511.71  | 162.769 | 508.253 | OK | 417.03  | 249.167 | 69.1953 | 204.877 | OK | 0.131459 | -0.25598 | -1.29419 | 1.095401 | -1.19414 | -2.45239 |
| RSc0356 | <i>secB</i> | preprotein translocase subunit SecB                                                                     | 5087.74 | 910.059 | 336.07  | 1416.95 | OK | 7707.73 | 1393.37 | 492.26  | 2187.17 | OK | 7748.23 | 1264.13 | 601.238 | 1856.66 | OK | 5787.64 | 998.055 | 450.198 | 1494.45 | OK | 0.614546 | 0.474113 | 0.133159 | 1.531077 | 1.389064 | 1.096693 |
| RSc0357 | <i>gpsA</i> | NAD(P)H-dependent glycerol-3-phosphate dehydrogenase                                                    | 1186.5  | 89.3697 | 39.2612 | 139.504 | OK | 1789.39 | 135.382 | 59.3984 | 211.187 | OK | 998.122 | 71.7007 | 39.9181 | 103.137 | OK | 1125.98 | 82.8516 | 45.1031 | 120.254 | OK | 0.599178 | -0.3178  | -0.10926 | 1.514853 | -1.24643 | -1.07867 |
| RSc0358 | <i>yibK</i> | putative tRNA/tRNA methyltransferase proteir                                                            | 595.277 | 124.023 | 46.7625 | 179.53  | OK | 673.438 | 142.04  | 52.0951 | 205.372 | OK | 459.047 | 86.1813 | 41.5451 | 123.421 | OK | 567.523 | 113.59  | 50.9871 | 154.58  | OK | 0.19569  | -0.52516 | -0.12677 | 1.145271 | -1.43909 | -1.09185 |
| RSc0359 |             | putative competence protein F-related protein                                                           | 108.509 | 12.4563 | 0       | 35.3626 | OK | 145.359 | 16.8003 | 0       | 40.0836 | OK | 70.0242 | 7.5351  | 0       | 18.8046 | OK | 88.8454 | 9.91279 | 0       | 23.2861 | OK | 0.431611 | -0.72518 | -0.32951 | 1.348739 | -1.6531  | -1.25659 |
| RSc0360 | <i>bioC</i> | putative biotin synthesis protein (methyltransferase                                                    | 1547.52 | 105.797 | 38.0798 | 173.923 | OK | 1460.95 | 100.284 | 34.6644 | 166.183 | OK | 1376.03 | 89.995  | 48.7244 | 131.262 | OK | 1517.62 | 101.447 | 54.4128 | 148.465 | OK | -0.07721 | -0.23338 | -0.06057 | -1.05497 | -1.17559 | -1.04288 |
| RSc0361 |             | hypothetical protein                                                                                    | 2445    | 444.749 | 167.368 | 685.197 | OK | 1652.31 | 303.811 | 111.329 | 468.779 | OK | 1257.1  | 208.307 | 100.715 | 314.58  | OK | 1413.37 | 247.764 | 113.15  | 361.49  | OK | -0.54982 | -1.09428 | -0.84402 | -1.4639  | -2.13507 | -1.79505 |
| RSc0362 | <i>coxB</i> | putative cytochrome C oxidase polypeptide II precursor (cytochrome AA3 subunit 2) transmembrane proteir | 10255.6 | 653.28  | 266.114 | 1038.98 | OK | 7070.17 | 452.067 | 192.654 | 709.015 | OK | 5477.45 | 334.477 | 184.15  | 484.584 | OK | 5017.05 | 312.671 | 170.447 | 453.441 | OK | -0.53116 | -0.96579 | -1.06306 | -1.4451  | -1.95314 | -2.08935 |
| RSc0363 | <i>coxA</i> | cytochrome C oxidase polypeptide I                                                                      | 17996.2 | 803.167 | 300.739 | 1305.92 | OK | 8966.29 | 401.219 | 165.155 | 636.547 | OK | 6901.27 | 297.778 | 165.578 | 430.115 | OK | 7608.98 | 333.061 | 182.282 | 483.276 | OK | -1.00131 | -1.43146 | -1.26991 | -2.00182 | -2.6972  | -2.41147 |
| RSc0364 |             | hypothetical protein                                                                                    | 52.7332 | 437.714 | 15.1245 | 53.1796 | OK | 28.5199 | 254.926 | 7.80618 | 29.7611 | OK | 27.7874 | 117.127 | 8.1821  | 29.3593 | OK | 27.1976 | 201.324 | 7.7008  | 27.9154 | OK | -0.77991 | -1.90191 | -1.12047 | -1.71702 | -3.73709 | -2.17418 |
| RSc0365 | <i>ctaG</i> | cytochrome C oxidase assembly protein                                                                   | 2032.26 | 292.79  | 116.324 | 468.678 | OK | 1138.04 | 165.363 | 65.247  | 264.266 | OK | 631.329 | 84.192  | 43.8149 | 123.203 | OK | 830.433 | 115.848 | 57.0637 | 163.784 | OK | -0.82423 | -1.79811 | -1.33763 | -1.77059 | -3.47765 | -2.52736 |
| RSc0366 |             | hypothetical protein                                                                                    | 325.526 | 342.026 | 59.261  | 215.275 | OK | 158.239 | 172.684 | 28.7234 | 101.59  | OK | 153.386 | 118.641 | 31.0201 | 86.2001 | OK | 156.839 | 153.867 | 31.9149 | 87.9898 | OK | -0.98597 | -1.5275  | -1.15242 | -1.98065 | -2.88287 | -2.22287 |
| RSc0367 | <i>coxC</i> | cytochrome C oxidase subunit III transmembrane proteir                                                  | 9458.51 | 871.434 | 345.267 | 1397.08 | OK | 3617.43 | 335.102 | 144.809 | 525.306 | OK | 3336.71 | 291.029 | 157.169 | 423.027 | OK | 3277.31 | 294.329 | 155.988 | 431.882 | OK | -1.37879 | -1.58223 | -1.56596 | -2.6005  | -2.99432 | -2.96075 |
| RSc0368 |             | hypothetical protein                                                                                    | 205.862 | 225.476 | 38.0272 | 135.242 | OK | 140.759 | 160.239 | 26.0671 | 89.8547 | OK | 203.404 | 162.972 | 42.0519 | 114.962 | OK | 155.933 | 159.454 | 32.0683 | 88.9442 | OK | -0.49275 | -0.46835 | -0.49983 | -1.40712 | -1.38353 | -1.41405 |
| RSc0369 |             | putative transmembrane cytochrome oxidase complex biogenesis factor transmembrane proteir               | 550.656 | 58.2307 | 26.2282 | 90.0444 | OK | 342.239 | 36.418  | 17.0399 | 55.714  | OK | 280.097 | 27.8742 | 15.7387 | 39.8824 | OK | 258.377 | 26.5868 | 14.5027 | 38.3991 | OK | -0.67713 | -1.06285 | -1.13107 | -1.59895 | -2.08905 | -2.19021 |
| RSc0370 |             | hypothetical protein                                                                                    | 644.968 | 85.4651 | 36.5734 | 134.268 | OK | 434.238 | 57.9943 | 25.343  | 89.1477 | OK | 397.915 | 49.0493 | 26.4715 | 71.473  | OK | 408.87  | 52.5392 | 27.1578 | 74.7085 | OK | -0.55942 | -0.8011  | -0.70194 | -1.47368 | -1.74243 | -1.62669 |
| RSc0371 | <i>ctaA</i> | putative heme O oxygenase (cytochrome aa3- controlling) transmembrane proteir                           | 740.293 | 51.2638 | 23.4722 | 79.0269 | OK | 590.638 | 41.0681 | 19.3439 | 62.5138 | OK | 444.598 | 29.4412 | 17.1047 | 41.7726 | OK | 456.919 | 30.9339 | 17.6865 | 44.0998 | OK | -0.31992 | -0.8001  | -0.72875 | -1.24826 | -1.74123 | -1.6572  |
| RSc0372 | <i>ctaB</i> | protoheme IX farnesyltransferase                                                                        | 918.775 | 76.7439 | 34.0297 | 119     | OK | 836.277 |         |         |         |    |         |         |         |         |    |         |         |         |         |    |          |          |          |          |          |          |

|         |              |                                                                                                                        |         |         |         |         |    |         |         |          |         |    |         |         |         |         |    |         |         |         |         |    |          |          |          |          |          |          |
|---------|--------------|------------------------------------------------------------------------------------------------------------------------|---------|---------|---------|---------|----|---------|---------|----------|---------|----|---------|---------|---------|---------|----|---------|---------|---------|---------|----|----------|----------|----------|----------|----------|----------|
| RSc0413 |              | hypothetical protein                                                                                                   | 1965.33 | 150.676 | 66.0721 | 235.044 | OK | 2327.59 | 179.26  | 79.2479  | 278.942 | OK | 1616.11 | 118.097 | 64.9265 | 171.32  | OK | 1761.5  | 131.906 | 71.267  | 192.117 | OK | 0.250604 | -0.35148 | -0.19194 | 1.189705 | -1.27587 | -1.1423  |
| RSc0414 |              | putative glutathione-regulated potassium-efflux system K <sup>+</sup> /H <sup>+</sup> antiporter transmembrane proteir | 1503.91 | 53.2745 | 23.386  | 83.1358 | OK | 1694.63 | 60.1563 | 26.4109  | 93.8693 | OK | 1169.29 | 40.2116 | 23.0382 | 57.3068 | OK | 1233.86 | 42.9198 | 24.418  | 61.3818 | OK | 0.175271 | -0.40583 | -0.3118  | 1.129176 | -1.32485 | -1.24126 |
| RSc0415 |              | hypothetical protein                                                                                                   | 1269.65 | 335.946 | 109.084 | 459.235 | OK | 559.358 | 150.289 | 51.3618  | 195.747 | OK | 860.297 | 200.644 | 88.9442 | 273.735 | OK | 688.099 | 173.848 | 71.5319 | 218.988 | OK | -1.16049 | -0.74359 | -0.9504  | -2.23533 | -1.67434 | -1.93241 |
| RSc0416 |              | hypothetical protein                                                                                                   | 1810.17 | 279.552 | 108.558 | 445.802 | OK | 524.398 | 81.7291 | 33.8133  | 128.135 | OK | 3018.82 | 429.635 | 215.393 | 642.887 | OK | 2416.05 | 360.814 | 173.587 | 511.545 | OK | -1.77419 | 0.619995 | 0.368139 | -3.42047 | 1.53687  | 1.290687 |
| RSc0417 | <i>apt</i>   | adenine phosphoribosyltransferase                                                                                      | 1816.25 | 219.04  | 90.1244 | 347.821 | OK | 2046.07 | 248.523 | 102.338  | 394.271 | OK | 1409.38 | 158.927 | 83.157  | 233.771 | OK | 1554.79 | 182.109 | 91.92   | 266.175 | OK | 0.182185 | -0.46283 | -0.26639 | 1.134601 | -1.37824 | -1.2028  |
| RSc0418 |              | transport transmembrane protein                                                                                        | 1079    | 151.389 | 61.1861 | 239.974 | OK | 1261.32 | 178.445 | 70.6233  | 284.567 | OK | 743.59  | 96.7264 | 50.1296 | 139.442 | OK | 572.962 | 77.8777 | 39.1829 | 109.364 | OK | 0.237219 | -0.64628 | -0.95898 | 1.178718 | -1.56513 | -1.94393 |
| RSc0419 |              | hypothetical protein                                                                                                   | 2087.02 | 414.732 | 150.269 | 624.001 | OK | 1036.84 | 208.471 | 75.6645  | 311.139 | OK | 1367.14 | 245.772 | 115.821 | 370.209 | OK | 1086.09 | 207.574 | 92.8136 | 293.082 | OK | -0.99233 | -0.75486 | -0.99855 | -1.9894  | -1.68747 | -1.998   |
| RSc0420 | <i>avrA1</i> | excinuclease ABC subunit A                                                                                             | 4808.86 | 114.574 | 49.2954 | 179.896 | OK | 7726.13 | 184.339 | 75.348   | 292.805 | OK | 6135.45 | 142.656 | 79.6529 | 205.94  | OK | 4652.6  | 109.016 | 61.6467 | 156.401 | OK | 0.686082 | 0.316261 | -0.07174 | 1.608908 | 1.245099 | -1.05098 |
| RSc0421 |              | putative multidrug-efflux transporter transmembrane proteiu                                                            | 912.69  | 58.6605 | 26.5018 | 90.7368 | OK | 1098.48 | 70.8699 | 31.4812  | 110.157 | OK | 467.939 | 28.8238 | 16.8108 | 40.8261 | OK | 756.093 | 47.5406 | 26.5807 | 67.8434 | OK | 0.272784 | -1.02513 | -0.30323 | 1.208137 | -2.03514 | -1.2339  |
| RSc0422 | <i>ssb</i>   | single-strand DNA-binding proteir                                                                                      | 1866.96 | 320.6   | 121.007 | 506.933 | OK | 2995.51 | 519.655 | 197.76   | 803.393 | OK | 1416.04 | 222.46  | 108.962 | 323.337 | OK | 1781.44 | 295.184 | 137.948 | 438.096 | OK | 0.69678  | -0.52723 | -0.11916 | 1.620883 | -1.44116 | -1.0861  |
| RSc0423 |              | hypothetical protein                                                                                                   | 52.7332 | 19.6945 | 5.99529 | 21.0802 | OK | 61.6398 | 23.496  | 7.15567  | 24.9481 | OK | 38.9023 | 12.3306 | 4.57885 | 16.026  | OK | 55.3017 | 19.548  | 6.86828 | 20.9864 | OK | 0.254622 | -0.67555 | -0.01077 | 1.193023 | -1.59721 | -1.00749 |
| RSc0424 |              | signal peptide protein                                                                                                 | 361.02  | 230.196 | 53.6675 | 198.195 | OK | 313.719 | 206     | 47.1775  | 176.479 | OK | 208.961 | 105.484 | 34.967  | 96.0361 | OK | 393.458 | 235.084 | 65.7478 | 191.58  | OK | -0.16022 | -1.12584 | 0.030314 | -1.11746 | -2.18228 | 1.021234 |
| RSc0425 |              | hypothetical protein                                                                                                   | 600.347 | 111.085 | 9.47073 | 212.397 | OK | 527.158 | 98.6157 | 3.91457  | 193.203 | OK | 280.097 | 47.1511 | 4.8583  | 89.4425 | OK | 544.858 | 97.1219 | 20.0561 | 174.151 | OK | -0.17177 | -1.2363  | -0.1938  | -1.12644 | -2.35594 | -1.14377 |
| RSc0426 |              | hypothetical protein                                                                                                   | 470.542 | 45.9138 | 0       | 98.7952 | OK | 495.878 | 48.666  | 0        | 103.418 | OK | 312.33  | 28.7826 | 3.09156 | 54.4888 | OK | 545.765 | 51.8739 | 8.73366 | 94.9882 | OK | 0.083986 | -0.67373 | 0.176081 | 1.059943 | -1.59519 | 1.129811 |
| RSc0427 |              | 3-oxoacyl-(acyl carrier protein) synthase I                                                                            | 1940.99 | 118.372 | 28.6022 | 208.631 | OK | 2437.99 | 149.618 | 41.2525  | 258.287 | OK | 1627.23 | 95.2461 | 46.592  | 143.932 | OK | 1800.48 | 107.465 | 46.5558 | 168.496 | OK | 0.334094 | -0.3136  | -0.13946 | 1.260585 | -1.2428  | -1.10149 |
| RSc0428 |              | hypothetical protein                                                                                                   | 241.356 | 22.1416 | 3.80145 | 40.4742 | OK | 247.479 | 22.8268 | 3.42876  | 42.1886 | OK | 147.829 | 12.8408 | 4.41192 | 21.3243 | OK | 200.355 | 17.9176 | 5.80902 | 30.001  | OK | 0.043969 | -0.78602 | -0.30538 | 1.030946 | -1.72432 | -1.23575 |
| RSc0429 |              | hypothetical protein                                                                                                   | 536.459 | 14.8787 | 4.49308 | 25.2666 | OK | 615.478 | 17.0983 | 5.33385  | 28.8917 | OK | 370.128 | 10.0003 | 5.21459 | 14.8062 | OK | 506.782 | 13.8158 | 7.00631 | 20.6645 | OK | 0.200604 | -0.57321 | -0.10693 | 1.14918  | -1.48783 | -1.07693 |
| RSc0430 |              | putative transmembrane protein                                                                                         | 262.652 | 35.6853 | 15.8977 | 54.4776 | OK | 328.439 | 44.9838 | 19.9481  | 68.9577 | OK | 220.076 | 27.7745 | 14.9839 | 40.5563 | OK | 266.536 | 35.1015 | 18.1804 | 49.247  | OK | 0.334076 | -0.36157 | -0.0238  | 1.260569 | -1.28482 | -1.01663 |
| RSc0431 |              | hypothetical protein                                                                                                   | 451.275 | 35.8794 | 2.65025 | 69.1714 | OK | 459.998 | 36.7452 | 0.927586 | 72.7493 | OK | 225.633 | 17.0774 | 3.98707 | 30.1971 | OK | 356.288 | 27.6578 | 6.01328 | 49.2827 | OK | 0.0344   | -1.07107 | -0.37547 | 1.024131 | -2.10099 | -1.29726 |
| RSc0432 |              | hypothetical protein                                                                                                   | 1339.63 | 54.5686 | 15.9678 | 93.1998 | OK | 1658.75 | 67.7306 | 21.4778  | 114.004 | OK | 774.712 | 30.563  | 15.5436 | 45.6445 | OK | 1310.02 | 52.3636 | 26.1415 | 78.5843 | OK | 0.311737 | -0.83628 | -0.05951 | 1.241201 | -1.78545 | -1.04211 |
| RSc0433 |              | hypothetical protein                                                                                                   | 290.033 | 37.7337 | 17.056  | 57.4414 | OK | 311.879 | 40.8895 | 18.4283  | 63.1267 | OK | 215.63  | 26.1236 | 14.1181 | 37.326  | OK | 305.519 | 38.5569 | 20.2102 | 54.5385 | OK | 0.115877 | -0.5305  | 0.031135 | 1.083633 | -1.44443 | 1.021816 |
| RSc0434 |              | acyl carrier protein                                                                                                   | 684.518 | 251.383 | 73.7928 | 293.446 | OK | 793.037 | 297.167 | 85.1013  | 340.597 | OK | 410.142 | 128.085 | 52.5648 | 154.48  | OK | 745.214 | 259.126 | 93.2175 | 286.838 | OK | 0.241387 | -0.97279 | 0.043767 | 1.182128 | -1.96263 | 1.030802 |
| RSc0435 | <i>fabG</i>  | 3-ketoacyl-(acyl-carrier-protein) reductase                                                                            | 743.335 | 86.2541 | 37.2753 | 134.91  | OK | 977.036 | 114.153 | 48.2334  | 179.64  | OK | 261.201 | 28.3957 | 15.7721 | 40.7595 | OK | 476.864 | 53.772  | 28.3544 | 79.1265 | OK | 0.404304 | -1.60292 | -0.68174 | 1.32345  | -3.03758 | -1.60407 |
| RSc0436 |              | hypothetical protein                                                                                                   | 379.273 | 39.9107 | 18.5548 | 61.2392 | OK | 669.758 | 70.9181 | 31.1188  | 110.663 | OK | 191.177 | 18.9335 | 10.6707 | 27.0871 | OK | 292.827 | 29.986  | 16.4985 | 43.3394 | OK | 0.829378 | -1.07562 | -0.41249 | 1.776919 | -2.10763 | -1.33098 |
| RSc0437 |              | hypothetical protein                                                                                                   | 53.7473 | 13.7176 | 4.97785 | 17.7336 | OK | 66.2398 | 17.1586 | 6.22232  | 21.6226 | OK | 43.3483 | 9.78662 | 4.14336 | 14.8854 | OK | 43.5161 | 10.6149 | 4.14336 | 14.8854 | OK | 0.322904 | -0.48715 | -0.36994 | 1.250846 | -1.40167 | -1.2923  |
| RSc0438 |              | hypothetical protein                                                                                                   | 99.3818 | 23.4253 | 8.88289 | 31.2382 | OK | 71.7597 | 17.1494 | 6.36607  | 22.9475 | OK | 55.5747 | 11.6756 | 5.25779 | 15.6273 | OK | 64.3676 | 14.5306 | 6.13409 | 18.1102 | OK | -0.44991 | -1.00457 | -0.68897 | -1.36595 | -2.00635 | -1.61219 |
| RSc0439 |              | putative lipase/esterase protein                                                                                       | 1309.2  | 106.456 | 46.2418 | 166.605 | OK | 1806.87 | 147.631 | 64.266   | 230.196 | OK | 1224.87 | 94.7376 | 51.6777 | 136.986 | OK | 1261.97 | 100.167 | 54.1417 | 146.176 | OK | 0.471738 | -0.16825 | -0.08785 | 1.38678  | -1.12369 | -1.06279 |
| RSc0440 |              | putative signal peptide protein                                                                                        | 991.79  | 99.4886 | 43.0942 | 155.075 | OK | 1113.2  | 112.331 | 47.9002  | 176.382 | OK | 652.447 | 61.7379 | 33.8993 | 89.0549 | OK | 850.378 | 83.0637 | 44.2509 | 121.295 | OK | 0.175153 | -0.68837 | -0.26031 | 1.129084 | -1.61147 | -1.19774 |
| RSc0441 | <i>gntK</i>  | thermoreistant gluconokinase (gluconate kinase 2) proteir                                                              | 1677.32 | 310.363 | 114.406 | 481.113 | OK | 1787.55 | 334.399 | 121.857  | 512.177 | OK | 1600.55 | 269.435 | 130.053 | 385.176 | OK | 1449.63 | 258.399 | 117.222 | 376.331 | OK | 0.107614 | -0.20402 | -0.26436 | 1.077445 | -1.1519  | -1.2011  |
| RSc0442 |              | acyl-CoA synthetase                                                                                                    | 3501.69 | 145.117 | 65.3392 | 224.765 | OK | 2064.47 | 85.7652 | 38.5805  | 132.893 | OK | 2496.42 | 100.165 | 57.0155 | 143.094 | OK | 2851.21 | 115.937 | 65.5629 | 165.678 | OK | -0.75875 | -0.53484 | -0.32388 | -1.69203 | -1.44878 | -1.25169 |
| RSc0443 |              | glycin-Rich signal peptide proteir                                                                                     | 65.9165 | 3.79362 | 1.91041 | 5.63069 | OK | 57.9598 | 3.34706 | 1.70932  | 4.97713 | OK | 56.6862 | 3.13598 | 1.73584 | 4.51317 | OK | 42.6095 | 2.40111 | 1.28948 | 3.47167 | OK | -0.18068 | -0.27466 | -0.65987 | -1.13342 | -1.20971 | -1.57994 |
| RSc0444 |              | putative signal peptide protein                                                                                        | 60.846  | 14.6625 | 5.40428 | 19.0651 | OK | 41.3998 | 10.1179 | 3.60285  | 13.0603 | OK | 48.9058 | 10.4826 | 4.59086 | 14.0688 | OK | 39.8898 | 9.20089 | 3.70231 | 12.884  | OK | -0.53522 | -0.48413 | -0.67229 | -1.44916 | -1.39875 | -1.5936  |
| RSc0445 |              | putative signal peptide protein                                                                                        | 45.6345 | 5.41229 | 2.46642 | 8.31275 | OK | 36.7999 | 4.39523 | 1.91833  | 6.85117 | OK | 36.6793 | 4.07107 | 2.07266 | 6.12787 | OK | 43.5161 | 5.01374 | 2.43312 | 7.56972 | OK | -0.3003  | -0.41083 | -0.11035 | -1.2314  | -1.32945 | -1.07949 |
| RSc0446 |              | lipoprotein                                                                                                            | 63.8883 | 10.2346 | 4.33907 | 15.3009 | OK | 64.3998 | 10.4149 | 4.33907  | 15.3009 | OK | 47.7943 | 7.03854 | 3.37934 | 10.2507 | OK | 71.6203 | 11.0867 | 5.2943  | 15.8829 | OK | 0.025194 | -0.54011 | 0.115375 | 1.017617 | -1.45408 | 1.083257 |
| RSc0447 |              | hypothetical protein                                                                                                   | 1282.84 | 70.0725 | 30.9759 | 108.632 | OK | 310.039 | 16.99   | 8.5964   | 25.357  | OK | 355.678 | 18.6997 | 11.1808 | 26.1991 | OK | 359.008 | 19.2084 | 11.3229 | 27.0519 | OK | -2.04416 | -1.90583 | -1.86711 | -4.12434 | -3.74725 | -3.64801 |
| RSc0448 | <i>queF</i>  | 7-cyano-7-deazaguanine reductase                                                                                       | 1056.69 | 101.267 | 44.0151 | 158.377 | OK | 1746.15 | 168.292 | 71.428   | 265.171 | OK | 1247.1  | 112.959 | 60.9416 | 164.771 | OK | 1348.09 | 125.874 | 66.1978 | 185.186 | OK | 0.732802 | 0.157635 | 0.313816 | 1.661864 | 1.115457 | 1.242991 |
| RSc0449 | <i>ilvA</i>  | threonine dehydratase                                                                                                  | 7109.86 | 336.182 | 143.085 | 528.561 | OK | 9961.72 | 472.346 | 192.753  | 731.472 | OK | 4819.44 | 220.056 | 123.145 | 316.074 | OK | 5089.57 | 235.95  | 130.44  | 341.503 | OK | 0.490602 | -0.61137 | -0.51076 | 1.405031 | -1.52771 | -1.4248  |
| RSc0450 |              | putative ATP-sensitive inward rectifier potassium channel related transmembrane protein                                | 723.053 | 61.1089 | 27.6701 | 94.3014 | OK | 641.238 | 54.4656 | 24.9519  | 83.8467 | OK | 551.301 | 44.2569 | 25.1651 | 63.3253 | OK | 589.281 | 48.5945 | 26.884  | 70.0635 | OK | -0.16604 | -0.46548 | -0.33059 | -1.12197 | -1.38078 | -1.25753 |
| RSc0451 |              | hypothetical conserved protein                                                                                         | 914.718 | 169.255 | 64.0222 | 260.508 | OK | 263.119 | 49.2218 | 19.9517  | 71.725  | OK | 370.128 | 62.3069 | 31.3921 | 91.5602 | OK | 271.069 | 48.     |         |         |    |          |          |          |          |          |          |

|         |             |                                                                                          |         |         |          |         |    |         |         |          |         |    |         |         |          |         |    |         |         |          |         |    |          |          |          |          |          |          |
|---------|-------------|------------------------------------------------------------------------------------------|---------|---------|----------|---------|----|---------|---------|----------|---------|----|---------|---------|----------|---------|----|---------|---------|----------|---------|----|----------|----------|----------|----------|----------|----------|
| RSc0494 |             | iron-sulfur cluster insertion protein ErpA                                               | 7287.32 | 2196.28 | 652.253  | 3128.69 | OK | 8733.53 | 2677.7  | 765.255  | 3790.73 | OK | 5370.74 | 1407.59 | 585.677  | 1920.69 | OK | 7259.03 | 2081.87 | 788.131  | 2418.77 | OK | 0.285932 | -0.64183 | -0.07718 | 1.219198 | -1.56031 | -1.05496 |
| RSc0495 | <i>ammK</i> | anhydro-N-acetyluramic acid kinase                                                       | 3165.01 | 204.032 | 91.8033  | 315.57  | OK | 3251.27 | 210.393 | 93.6338  | 326.609 | OK | 3272.24 | 202.149 | 112.617  | 291.556 | OK | 3209.31 | 202.392 | 111.358  | 292.322 | OK | 0.044291 | -0.01338 | -0.01164 | 1.031176 | -1.00931 | -1.0081  |
| RSc0496 | <i>tyrS</i> | tyrosyl-tRNA synthetase                                                                  | 2872.95 | 181.927 | 74.6702  | 288.958 | OK | 3317.51 | 210.865 | 85.5949  | 336.262 | OK | 2553.1  | 155.01  | 81.0445  | 228.692 | OK | 2280.06 | 141.266 | 76.1948  | 206.222 | OK | 0.21296  | -0.231   | -0.36495 | 1.159064 | -1.17365 | -1.28783 |
| RSc0497 |             | D-tyrosyl-tRNA deacylase                                                                 | 669.306 | 127.129 | 0.949704 | 311.883 | OK | 806.837 | 154.981 | 0.58417  | 374.758 | OK | 826.952 | 142.609 | 14.4859  | 272.128 | OK | 467.798 | 85.5459 | 3.29165  | 176.469 | OK | 0.285798 | 0.165772 | -0.57152 | 1.219085 | 1.121766 | -1.48609 |
| RSc0498 |             | hypothetical protein                                                                     | 49.6909 | 412.461 | 0        | 343.472 | OK | 35.8799 | 320.713 | 0        | 365.427 | OK | 61.1322 | 257.678 | 2.8878   | 226.692 | OK | 37.17   | 275.143 | 1.4439   | 133.801 | OK | -0.36297 | -0.67869 | -0.58408 | -1.28608 | -1.60068 | -1.49908 |
| RSc0499 | <i>gpmB</i> | putative phosphoglycerate mutase 2 protein                                               | 951.226 | 117.355 | 43.6737  | 191.103 | OK | 875.837 | 108.846 | 42.9995  | 174.608 | OK | 859.185 | 98.9937 | 53.4612  | 144.599 | OK | 657.275 | 78.7265 | 44.078   | 113.309 | OK | -0.10859 | -0.24547 | -0.57596 | -1.07817 | -1.18548 | -1.49067 |
| RSc0500 | <i>ruvB</i> | Holliday junction DNA helicase E                                                         | 2518.01 | 177.808 | 79.6318  | 275.173 | OK | 2498.71 | 177.183 | 79.0321  | 274.394 | OK | 2234.1  | 150.771 | 83.8215  | 217.569 | OK | 2230.2  | 153.94  | 84.1173  | 223.485 | OK | -0.00508 | -0.23796 | -0.20795 | -1.00353 | -1.17932 | -1.15505 |
| RSc0501 | <i>ruvA</i> | Holliday junction DNA helicase motor protein                                             | 769.702 | 118.019 | 47.6921  | 187.449 | OK | 590.638 | 91.3895 | 37.5119  | 144.183 | OK | 325.668 | 46.0393 | 24.2337  | 65.824  | OK | 353.568 | 52.4323 | 26.4169  | 71.7187 | OK | -0.36892 | -1.35808 | -1.17049 | -1.29138 | -2.56344 | -2.25088 |
| RSc0502 | <i>glpQ</i> | putative glycerophosphoryl diester phosphodiesterase, periplasmic precursor protein      | 1465.37 | 96.7908 | 42.1977  | 151.175 | OK | 514.278 | 34.1018 | 16.1994  | 51.9399 | OK | 607.988 | 38.4571 | 22.183   | 54.4237 | OK | 696.258 | 44.9804 | 25.2562  | 63.6992 | OK | -1.50502 | -1.33162 | -1.10557 | -2.83829 | -2.51685 | -2.15184 |
| RSc0503 | <i>ruvC</i> | Holliday junction resolvase                                                              | 518.205 | 86.9034 | 35.5031  | 134.228 | OK | 475.638 | 80.5609 | 32.6723  | 120.899 | OK | 484.612 | 74.4749 | 37.9328  | 104.257 | OK | 555.737 | 89.9733 | 43.4016  | 129.507 | OK | -0.10933 | -0.22266 | 0.050084 | -1.07873 | -1.16688 | 1.035325 |
| RSc0504 | <i>purH</i> | bifunctionalphosphoribosylaminoimidazolecarboxamide formyltransferase/IMP cyclohydrolase | 2679.25 | 122.113 | 54.8737  | 189.278 | OK | 6024.14 | 275.304 | 118.212  | 431.957 | OK | 9890.08 | 435.615 | 235.894  | 635.074 | OK | 5312.59 | 237.452 | 131.379  | 341.538 | OK | 1.172809 | 1.834837 | 0.959419 | 2.254502 | 3.567311 | 1.944527 |
| RSc0505 | <i>fis</i>  | DNA-binding protein Fis                                                                  | 74.0293 | 60.0767 | 0.275218 | 118.344 | OK | 89.2397 | 74.8892 | 0.275218 | 148.618 | OK | 121.153 | 75.2095 | 8.95958  | 126.792 | OK | 85.2191 | 64.651  | 5.70155  | 112.402 | OK | 0.317952 | 0.324109 | 0.105867 | 1.24656  | 1.251891 | 1.076141 |
| RSc0506 |             | NIFR3-like protein                                                                       | 914.718 | 64.8057 | 23.2381  | 106.413 | OK | 1171.16 | 83.3217 | 29.952   | 136.598 | OK | 696.907 | 47.1819 | 25.1851  | 69.1913 | OK | 572.962 | 39.678  | 21.6062  | 57.8936 | OK | 0.362572 | -0.45789 | -0.70778 | 1.285716 | -1.37353 | -1.63329 |
| RSc0507 |             | amino acid dehydrogenase transmembrane protein                                           | 924.859 | 53.659  | 24.2516  | 82.9315 | OK | 894.237 | 52.0604 | 23.5934  | 80.2481 | OK | 597.984 | 33.3428 | 19.4291  | 47.1492 | OK | 715.296 | 40.3224 | 23.0252  | 58.0875 | OK | -0.04363 | -0.68644 | -0.40119 | -1.03071 | -1.60931 | -1.3206  |
| RSc0508 | <i>ubiH</i> | hypothetical protein                                                                     | 1716.87 | 102.949 | 7.1904   | 199.091 | OK | 1577.79 | 94.9455 | 8.18038  | 182.626 | OK | 982.561 | 56.5738 | 13.0044  | 100.18  | OK | 1300.04 | 76.3052 | 17.9389  | 134.671 | OK | -0.11676 | -0.86372 | -0.43208 | -1.0843  | -1.81973 | -1.34917 |
| RSc0509 | <i>pepP</i> | XAA-Pro aminopeptidase                                                                   | 4513.76 | 239.25  | 62.5985  | 416.617 | OK | 4050.75 | 215.381 | 55.4572  | 374.588 | OK | 2976.58 | 151.966 | 72.5475  | 231.938 | OK | 3830.33 | 198.908 | 94.3044  | 303.737 | OK | -0.15163 | -0.65477 | -0.26642 | -1.11082 | -1.57437 | -1.20282 |
| RSc0510 |             | hypothetical protein                                                                     | 853.872 | 28.2871 | 0.550436 | 58.8966 | OK | 688.157 | 22.8419 | 0.091739 | 55.7469 | OK | 570.197 | 18.3569 | 1.35751  | 35.3255 | OK | 661.808 | 21.5352 | 2.98653  | 40.0014 | OK | -0.30846 | -0.62382 | -0.39345 | -1.23839 | -1.54095 | -1.31353 |
| RSc0511 |             | nucleotidyl transferase family protein                                                   | 631.784 | 72.1403 | 0.620946 | 143.793 | OK | 800.397 | 92.0127 | 3.63697  | 180.429 | OK | 681.346 | 72.9471 | 16.8017  | 128.901 | OK | 579.308 | 64.2967 | 11.8137  | 116.562 | OK | 0.351028 | 0.016045 | -0.16606 | 1.275469 | 1.011184 | -1.12199 |
| RSc0512 |             | Branched-chain amino acid transport                                                      | 125.748 | 48.6113 | 0        | 110.846 | OK | 188.599 | 74.4534 | 0        | 156.965 | OK | 146.717 | 47.9366 | 0        | 95.7831 | OK | 137.801 | 50.3773 | 0.194286 | 100.446 | OK | 0.615046 | -0.02016 | 0.051482 | 1.531607 | -0.10407 | 1.036329 |
| RSc0513 |             | hypothetical protein                                                                     | 429.978 | 48.8373 | 0        | 108.925 | OK | 636.638 | 72.7973 | 0.088342 | 146.559 | OK | 394.581 | 42.0325 | 3.22451  | 80.8742 | OK | 396.178 | 43.742  | 3.48596  | 83.7502 | OK | 0.575902 | -0.21648 | -0.15896 | 1.490609 | -1.16189 | -1.11649 |
| RSc0514 |             | hypothetical protein                                                                     | 1460.3  | 104.843 | 8.40007  | 204.976 | OK | 1853.79 | 133.66  | 14.0596  | 257.976 | OK | 1249.32 | 85.6768 | 24.5512  | 147.239 | OK | 1295.51 | 90.9041 | 27.085   | 155.143 | OK | 0.350337 | -0.29125 | -0.20581 | 1.274859 | -1.2237  | -1.15334 |
| RSc0515 |             | organic solvent tolerance transmembrane protein                                          | 7195.04 | 203.767 | 24.1372  | 383.736 | OK | 8277.21 | 234.807 | 23.767   | 447.37  | OK | 6024.3  | 166.16  | 35.078   | 297.707 | OK | 6010.66 | 167.308 | 47.6748  | 286.857 | OK | 0.204555 | -0.29435 | -0.28441 | 1.152331 | -1.22633 | -1.21792 |
| RSc0516 | <i>surA</i> | peptidyl-prolyl cis-trans isomerase                                                      | 8520.47 | 411.029 | 18.2348  | 806.673 | OK | 9841.2  | 476.096 | 28.301   | 933.347 | OK | 11508.4 | 535.874 | 199.013  | 874.372 | OK | 9065.86 | 428.735 | 152.939  | 704.78  | OK | 0.212012 | 0.382654 | 0.060846 | 1.158303 | 1.303738 | 1.043077 |
| RSc0517 | <i>pdxA</i> | 4-hydroxythreonine-4-phosphate dehydrogenase                                             | 1022.21 | 76.9954 | 34.3219  | 119.113 | OK | 1264.08 | 95.6377 | 41.8575  | 149.446 | OK | 788.05  | 56.61   | 31.9844  | 80.5858 | OK | 805.955 | 59.3036 | 32.7965  | 85.7708 | OK | 0.312807 | -0.44372 | -0.37665 | 1.242122 | -1.3601  | -1.29833 |
| RSc0518 | <i>ksgA</i> | dimethyladenosine transferase                                                            | 1088.13 | 102.45  | 16.9757  | 187.722 | OK | 1647.71 | 156.003 | 34.4842  | 277.092 | OK | 1353.8  | 120.562 | 55.8718  | 185.113 | OK | 1115.1  | 102.315 | 42.5046  | 161.833 | OK | 0.606654 | 0.234855 | -0.0019  | 1.522723 | 1.176789 | -1.00132 |
| RSc0519 |             | hypothetical protein                                                                     | 1161.14 | 100.508 | 17.4864  | 183.394 | OK | 1354.24 | 117.824 | 19.6899  | 216.021 | OK | 703.576 | 57.7956 | 18.0918  | 97.4712 | OK | 723.456 | 61.0864 | 19.2389  | 102.59  | OK | 0.229323 | -0.79828 | -0.71839 | 1.172285 | -1.73903 | -1.64534 |
| RSc0520 | <i>gloA</i> | lactoylglutathione lyase                                                                 | 1049.59 | 274.362 | 8.88753  | 568.802 | OK | 1031.32 | 273.701 | 3.98084  | 612.785 | OK | 272.316 | 62.8194 | 0.461371 | 142.333 | OK | 533.979 | 133.321 | 7.98961  | 260.911 | OK | -0.00348 | -2.1268  | -1.04118 | -1.00242 | -4.36747 | -2.05791 |
| RSc0521 |             | hypothetical protein                                                                     | 812.294 | 74.2016 | 14.7818  | 133.779 | OK | 847.317 | 77.8199 | 13.2962  | 141.95  | OK | 742.479 | 64.2302 | 14.3624  | 114.166 | OK | 701.697 | 62.4881 | 19.172   | 105.739 | OK | 0.068689 | -0.2082  | -0.24787 | 1.048763 | -1.15524 | -1.18745 |
| RSc0522 |             | putative acyltransferase transmembrane protein                                           | 522.262 | 56.91   | 5.47366  | 108.361 | OK | 772.797 | 84.755  | 13.9407  | 155.572 | OK | 920.318 | 94.244  | 26.7457  | 161.74  | OK | 689.912 | 73.1233 | 23.177   | 123.098 | OK | 0.574616 | 0.727719 | 0.361649 | 1.489281 | 1.656018 | 1.284894 |
| RSc0523 |             | D,D-heptose 1,7-bisphosphate phosphatase                                                 | 876.182 | 128.826 | 10.4392  | 254.07  | OK | 1003.72 | 148.868 | 7.26754  | 303.753 | OK | 1642.79 | 223.295 | 82.914   | 363.191 | OK | 954.635 | 135.859 | 42.6945  | 228.985 | OK | 0.20861  | 0.793527 | 0.076686 | 1.155574 | 1.733307 | 1.054593 |
| RSc0524 | <i>glyS</i> | glycyl-tRNA synthetase subunit beta                                                      | 3918.48 | 130.618 | 57.9424  | 203.321 | OK | 5673.62 | 189.495 | 81.3778  | 297.462 | OK | 6520.03 | 211.19  | 117.658  | 304.764 | OK | 5040.62 | 165.036 | 92.3544  | 237.166 | OK | 0.536806 | 0.693188 | 0.337427 | 1.450757 | 1.616852 | 1.263501 |
| RSc0525 |             | putative signal peptide protein                                                          | 674.377 | 91.6244 | 8.30327  | 174.875 | OK | 957.716 | 131.171 | 11.3411  | 250.313 | OK | 783.604 | 98.8941 | 29.9677  | 167.62  | OK | 522.193 | 68.7702 | 14.884   | 122.668 | OK | 0.517645 | 0.110153 | -0.41395 | 1.431616 | 1.079342 | -1.33233 |
| RSc0526 | <i>glyQ</i> | glycyl-tRNA synthetase subunit alpha                                                     | 2339.53 | 184.641 | 60.849   | 308.902 | OK | 3260.47 | 258.526 | 82.5421  | 434.436 | OK | 1960.68 | 147.344 | 70.0393  | 224.396 | OK | 2071.55 | 159.639 | 79.6828  | 239.588 | OK | 0.485586 | -0.32553 | -0.20991 | 1.400155 | -1.25313 | -1.15662 |
| RSc0527 | <i>Int</i>  | apolipoprotein N-acyltransferase                                                         | 1226.05 | 55.9988 | 25.0312  | 86.9741 | OK | 1296.28 | 59.3663 | 26.4241  | 92.3409 | OK | 1110.38 | 49.0095 | 27.9668  | 69.8363 | OK | 1440.56 | 64.5237 | 36.2114  | 92.5896 | OK | 0.084248 | -0.19233 | 0.204433 | 1.060135 | -1.14261 | 1.152234 |
| RSc0528 |             | hypothetical protein                                                                     | 3217.74 | 281.937 | 123.058  | 439.607 | OK | 2124.27 | 187.095 | 80.9141  | 292.999 | OK | 3424.52 | 284.621 | 154.048  | 413.203 | OK | 2716.13 | 232.118 | 124.088  | 340.039 | OK | -0.5916  | 0.013669 | -0.28051 | -1.50692 | 1.00952  | -1.21463 |
| RSc0529 |             | putative metalloprotease                                                                 | 1914.62 | 203.469 | 85.7841  | 319.992 | OK | 2736.07 | 292.599 | 122.848  | 461.624 | OK | 2369.71 | 236.938 | 126.65   | 345.867 | OK | 2834.89 | 293.133 | 152.377  | 432.147 | OK | 0.524116 | 0.219701 | 0.526746 | 1.438052 | 1.164492 | 1.440676 |
| RSc0530 |             | PHOH-like protein                                                                        | 1044.52 | 82.4361 | 36.6783  | 128.143 | OK | 1674.39 | 132.765 | 57.8819  | 206.57  | OK | 1153.73 | 86.7023 | 47.4863  | 125.179 | OK | 1353.53 | 104.307 | 56.0611  | 152.463 | OK | 0.687527 | 0.072794 | 0.339488 | 1.61052  | 1.051752 | 1.265307 |
| RSc0531 |             | hypothetical protein                                                                     | 3050.41 | 162.086 | 73.5877  | 250.292 | OK | 3845.59 | 204.981 | 91.9144  | 371.505 | OK | 2805.41 | 143.573 | 81.1022  | 205.853 | OK | 2118.69 | 110.294 | 61.8208  | 158.505 | OK | 0.338731 | -0.17498 | -0.55541 | 1.264643 | -1.12894 | -1.46958 |
| RSc0532 |             | hypothetical protein                                                                     | 1935.92 | 636.276 | 18       |         |    |         |         |          |         |    |         |         |          |         |    |         |         |          |         |    |          |          |          |          |          |          |

|                |                     |                                                                                                |         |         |          |         |    |         |         |          |         |    |         |         |         |         |         |         |         |          |         |         |          |          |           |                 |                 |                 |               |
|----------------|---------------------|------------------------------------------------------------------------------------------------|---------|---------|----------|---------|----|---------|---------|----------|---------|----|---------|---------|---------|---------|---------|---------|---------|----------|---------|---------|----------|----------|-----------|-----------------|-----------------|-----------------|---------------|
| <b>RSc0576</b> | <b><i>purK</i></b>  | phosphoribosylaminoimidazole carboxylase ATPase subuni                                         | 2531.19 | 150.936 | 67.8751  | 233.907 | OK | 3484.95 | 208.541 | 94.0088  | 322.627 | OK | 3245.56 | 185.862 | 104.044 | 267.528 | OK      | 2676.24 | 156.214 | 86.8061  | 225.225 | OK      | 0.466394 | 0.300295 | 0.049587  | 1.381652        | 1.231396        | 1.034968        |               |
| <b>RSc0577</b> |                     | hypothetical protein                                                                           | 1370.05 | 103.925 | 45.482   | 162.372 | OK | 1703.83 | 129.824 | 57.0118  | 202.694 | OK | 1813.96 | 131.197 | 72.4549 | 189.338 | OK      | 1515.81 | 112.317 | 60.5153  | 164.076 | OK      | 0.321014 | 0.336192 | 0.112034  | 1.249209        | 1.26242         | 1.080751        |               |
| <b>RSc0580</b> |                     | putative lipase / esterase protein                                                             | 2433.84 | 177.711 | 79.1441  | 275.061 | OK | 1419.55 | 104.099 | 45.4631  | 162.421 | OK | 1289.33 | 89.8762 | 49.8394 | 129.862 | OK      | 2816.76 | 200.978 | 109.476  | 291.126 | OK      | -0.77158 | -0.98352 | -0.177505 | -1.70713        | -1.97729        | 1.130926        |               |
| <b>RSc0581</b> |                     | putative phosphoglycolate phosphatase protein                                                  | 925.873 | 110.419 | 46.8788  | 174.029 | OK | 300.839 | 36.132  | 16.5131  | 55.4105 | OK | 171.17  | 19.0984 | 10.5886 | 27.6028 | OK      | 244.778 | 28.3565 | 15.1136  | 40.9064 | OK      | -1.61164 | -2.53146 | -1.96124  | <b>-3.05599</b> | <b>-5.78158</b> | <b>-3.89396</b> |               |
| <b>RSc0582</b> |                     | AvrD-related protein                                                                           | 918.775 | 99.6118 | 42.8488  | 156.147 | OK | 268.639 | 29.3127 | 13.715   | 44.8933 | OK | 90.0311 | 9.17515 | 4.95815 | 13.3618 | OK      | 145.96  | 15.3932 | 8.31961  | 22.1016 | OK      | -1.76479 | -3.44051 | -2.69402  | <b>-3.39825</b> | <b>-10.8567</b> | <b>-6.47116</b> |               |
| <b>RSc0583</b> | <b><i>mobB2</i></b> | molybdopterin-guanine dinucleotide biosynthesis protein I                                      | 225.13  | 39.6101 | 1.46366  | 77.33   | OK | 262.199 | 46.615  | 1.34169  | 91.7226 | OK | 185.62  | 29.8245 | 5.65527 | 53.7853 | OK      | 195.823 | 33.2276 | 5.41462  | 61.0048 | OK      | 0.234926 | -0.40937 | -0.25349  | 1.176846        | -1.32811        | -1.19208        |               |
| <b>RSc0584</b> |                     | D-alanyl-D-alanine carboxypeptidase                                                            | 1167.23 | 54.3531 | 17.7882  | 90.9899 | OK | 1472.91 | 68.7765 | 22.8334  | 114.681 | OK | 864.743 | 38.8972 | 20.2415 | 57.531  | OK      | 1112.38 | 50.791  | 26.3     | 75.3385 | OK      | 0.339553 | -0.4827  | -0.09779  | 1.265365        | -1.39735        | -1.07013        |               |
| <b>RSc0585</b> |                     | putative transport transmembrane proteir                                                       | 1795.97 | 108.603 | 48.1302  | 168.377 | OK | 1265.92 | 76.8239 | 33.8013  | 118.83  | OK | 841.402 | 48.8445 | 27.753  | 69.9003 | OK      | 786.01  | 46.5211 | 26.5103  | 66.4312 | OK      | -0.49944 | -1.1528  | -1.22311  | -1.41366        | <b>-2.22344</b> | <b>-2.33449</b> |               |
| <b>RSc0586</b> |                     | hypothetical protein                                                                           | 5528.87 | 1903    | 545.743  | 2521.45 | OK | 3535.55 | 1240.44 | 358.462  | 1463.83 | OK | 4562.69 | 1345.61 | 537.098 | 1751.68 | OK      | 5304.43 | 1731.47 | 622.537  | 2046.16 | OK      | -0.61742 | -0.50002 | -0.13628  | -1.53413        | -1.41423        | -1.09907        |               |
| <b>RSc0587</b> |                     | hypothetical protein                                                                           | 1176.36 | 108.38  | 46.8235  | 169.642 | OK | 932.877 | 86.4174 | 38.0721  | 134.786 | OK | 987.007 | 86.0871 | 47.1506 | 124.923 | OK      | 833.152 | 74.8239 | 40.3621  | 108.764 | OK      | -0.3267  | -0.33223 | -0.35453  | -1.25415        | -1.25896        | -1.44847        |               |
| <b>RSc0588</b> |                     | hypothetical protein                                                                           | 2161.05 | 54.5777 | 23.7942  | 85.2981 | OK | 2753.55 | 69.6452 | 30.3245  | 108.997 | OK | 1675.02 | 41.2564 | 23.7072 | 58.7527 | OK      | 1777.81 | 44.1474 | 25.347   | 62.9459 | OK      | 0.351712 | -0.40369 | -0.30598  | 1.276074        | -1.32289        | -1.23626        |               |
| <b>RSc0589</b> |                     | amidase                                                                                        | 654.095 | 35.5478 | 16.8294  | 54.3129 | OK | 662.398 | 36.1147 | 16.8772  | 55.2213 | OK | 495.727 | 25.934  | 15.2815 | 36.6002 | OK      | 500.435 | 26.6407 | 15.4702  | 37.685  | OK      | 0.022826 | -0.45492 | -0.41613  | 1.015948        | -1.3707         | -1.33434        |               |
| <b>RSc0590</b> |                     | putative transcription regulator protein                                                       | 1889.27 | 324.431 | 122.566  | 512.809 | OK | 431.478 | 74.852  | 30.4615  | 110.933 | OK | 359.013 | 56.4008 | 28.8672 | 78.2018 | OK      | 319.118 | 52.8777 | 25.9095  | 74.061  | OK      | -2.1158  | -2.52412 | -2.61718  | <b>-4.3343</b>  | <b>-5.75224</b> | <b>-6.1355</b>  |               |
| <b>RSc0591</b> |                     | hypothetical protein                                                                           | 3891.1  | 1360.67 | 397.046  | 1627.57 | OK | 991.756 | 353.598 | 102.108  | 418.513 | OK | 900.311 | 269.262 | 109.017 | 336.073 | OK      | 1101.5  | 365.148 | 132.588  | 418.94  | OK      | -1.94414 | -2.33723 | -1.89776  | <b>-3.84807</b> | <b>-5.05333</b> | <b>-3.72635</b> |               |
| <b>RSc0592</b> |                     | hypothetical protein                                                                           | 676.405 | 41.4866 | 19.2353  | 63.7102 | OK | 12512   | 770.192 | 305.426  | 1235.26 | OK | 4641.6  | 273.196 | 151.595 | 393.456 | OK      | 3400.6  | 204.122 | 112.91   | 294.908 | OK      | 4.214501 | 2.719219 | 2.298714  | <b>18.56484</b> | <b>6.585162</b> | <b>4.920191</b> |               |
| <b>RSc0593</b> |                     | hypothetical protein                                                                           | 6685.96 | 521.915 | 218.585  | 820.118 | OK | 18008   | 1412.23 | 527.475  | 2286.53 | OK | 27326.1 | 2031.91 | 971.383 | 3086.01 | OK      | 17107.3 | 1304.1  | 652.567  | 1953    | OK      | 1.436088 | 1.96095  | 1.321168  | <b>2.705862</b> | <b>3.893182</b> | <b>2.498683</b> |               |
| <b>RSc0594</b> |                     | hypothetical protein                                                                           | 608.46  | 199.982 | 62.7774  | 242.631 | OK | 910.797 | 304.925 | 91.2798  | 370.351 | OK | 2234.1  | 632.468 | 260.355 | 826.267 | OK      | 979.113 | 305.544 | 114.428  | 358.767 | OK      | 0.608584 | 1.661122 | 0.61151   | 1.524762        | <b>3.162625</b> | 1.527858        |               |
| <b>RSc0595</b> |                     | putative outer membrane receptor signal peptide proteir                                        | 6020.71 | 191.193 | 81.0747  | 301.42  | OK | 17042   | 542.198 | 200.555  | 883.911 | OK | 44432   | 1372.04 | 577.847 | 2165.7  | OK      | 15110.1 | 471.4   | 246.845  | 695.424 | OK      | 1.50379  | 2.843221 | 1.301922  | <b>2.835867</b> | <b>7.176204</b> | <b>2.465571</b> |               |
| <b>RSc0596</b> |                     | hypothetical protein                                                                           | 116.622 | 108.982 | 20.3066  | 69.6227 | OK | 146.279 | 141.697 | 25.5283  | 92.5402 | OK | 153.386 | 107.393 | 29.7625 | 82.7055 | OK      | 97.9113 | 85.4665 | 18.6016  | 54.3739 | OK      | 0.378719 | -0.02119 | -0.35066  | 1.300187        | -1.0148         | -1.27514        |               |
| <b>RSc0597</b> |                     | hypothetical protein                                                                           | 164.284 | 142.782 | 27.9636  | 98.2962 | OK | 71.7597 | 64.5689 | 12.1458  | 43.7814 | OK | 136.714 | 89.9842 | 25.6356 | 71.6124 | OK      | 54.3952 | 44.1754 | 9.75266  | 29.258  | OK      | -1.1449  | -0.66607 | -1.6925   | <b>-2.21131</b> | -1.58675        | <b>-3.23216</b> |               |
| <b>RSc0598</b> |                     | hypothetical protein                                                                           | 835.618 | 278.838 | 85.1403  | 341.289 | OK | 98.4396 | 33.4677 | 10.9154  | 38.204  | OK | 216.741 | 62.1896 | 26.3818 | 72.505  | OK      | 109.697 | 34.7418 | 13.2806  | 38.4061 | OK      | -3.05859 | -2.16468 | -3.00468  | <b>-8.53436</b> | <b>-4.48368</b> | <b>-8.02601</b> |               |
| <b>RSc0599</b> |                     | putative transcription regulator protein                                                       | 2190.46 | 104.262 | 31.6266  | 176.327 | OK | 2108.63 | 100.65  | 33.242   | 167.74  | OK | 2659.81 | 122.238 | 61.8123 | 182.585 | OK      | 2029.85 | 94.7245 | 47.6382  | 141.74  | OK      | -0.05087 | 0.229479 | -0.1384   | -1.03589        | 1.17241         | -1.10069        |               |
| <b>RSc0600</b> |                     | hypothetical protein                                                                           | 91.269  | 12.4003 | 0        | 44.7567 | OK | 62.5598 | 8.56834 | 0        | 32.5043 | OK | 53.3517 | 6.73321 | 0       | 26.0719 | OK      | 43.5161 | 5.73085 | 0        | 22.0762 | OK      | -0.53329 | -0.88101 | -1.11355  | -1.44722        | -1.84166        | <b>-2.16378</b> |               |
| <b>RSc0601</b> |                     | hypothetical protein                                                                           | 885.309 | 38.4714 | 0.35256  | 81.3239 | OK | 632.038 | 27.5359 | 0.195867 | 60.2094 | OK | 660.228 | 27.7526 | 2.04816 | 53.484  | OK      | 618.292 | 26.3558 | 3.51665  | 49.1945 | OK      | -0.48247 | -0.47116 | -0.54567  | -1.39714        | -1.38623        | -1.45969        |               |
| <b>RSc0602</b> |                     | hypothetical protein                                                                           | 241.356 | 26.7069 | 0        | 75.3076 | OK | 112.261 | 129.72  | 14.4482  | 0       | OK | 46.3964 | OK      | 11.6652 | 0       | 34.9253 | OK      | 123.296 | 13.2672  | 0       | 35.6084 | OK       | -0.88632 | -1.195    | -1.00935        | -1.84846        | <b>-2.28945</b> | <b>-2.013</b> |
| <b>RSc0603</b> |                     | hypothetical protein                                                                           | 433.021 | 38.8936 | 0        | 116.047 | OK | 297.159 | 26.8327 | 0        | 82.8028 | OK | 184.508 | 15.7048 | 0       | 48.8572 | OK      | 225.74  | 19.7702 | 0        | 55.9634 | OK      | -0.53554 | -1.30833 | -0.97621  | -1.44949        | <b>-2.47654</b> | -1.96728        |               |
| <b>RSc0604</b> |                     | hydrolase oxidoreductase protein                                                               | 2272.6  | 206.718 | 89.4211  | 323.337 | OK | 2275.15 | 208.066 | 89.6432  | 326.076 | OK | 2615.35 | 225.327 | 122.536 | 327.078 | OK      | 2351.68 | 208.547 | 111.363  | 304.952 | OK      | 0.009377 | 0.124356 | 0.012709  | 1.006521        | 1.090021        | 1.008848        |               |
| <b>RSc0605</b> | <b><i>adhC2</i></b> | bifunctional: glutathione-dependent formaldehyde dehydrogenase/alcohol dehydrogenase class III | 5334.17 | 363.517 | 158.995  | 567.508 | OK | 5462.94 | 373.794 | 162.021  | 585.543 | OK | 5900.93 | 384.743 | 210.337 | 558.412 | OK      | 5800.34 | 386.51  | 207.582  | 563.52  | OK      | 0.040221 | 0.081872 | 0.088483  | 1.028271        | 1.058391        | 1.063252        |               |
| <b>RSc0606</b> |                     | putative methyl-accepting chemotaxis transmembrane protein                                     | 120.678 | 4.59323 | 2.3968   | 6.77357 | OK | 1678.07 | 64.0144 | 28.31    | 99.6583 | OK | 714.691 | 26.377  | 15.4203 | 37.2486 | OK      | 405.244 | 15.1409 | 9.08084  | 21.1772 | OK      | 3.800816 | 2.5217   | 1.72087   | <b>13.93669</b> | <b>5.742582</b> | <b>3.296351</b> |               |
| <b>RSc0607</b> |                     | putative glutathione S-transferase proteir                                                     | 26.3666 | 3.53753 | 1.5047   | 5.51722 | OK | 116.84  | 15.801  | 7.12223  | 240.751 | OK | 78.9161 | 9.84224 | 5.14586 | 14.349  | OK      | 34.4503 | 4.48119 | 2.07814  | 6.82816 | OK      | 2.159202 | 1.476244 | 0.34114   | <b>4.466676</b> | <b>2.782235</b> | <b>1.266757</b> |               |
| <b>RSc0609</b> |                     | putative lipoprotein                                                                           | 247.44  | 19.5285 | 9.6799   | 29.369  | OK | 560.278 | 44.4251 | 20.7426  | 67.891  | OK | 460.159 | 34.5807 | 19.813  | 49.3702 | OK      | 439.694 | 33.884  | 19.2284  | 48.006  | OK      | 1.185794 | 0.824386 | 0.795023  | <b>2.274885</b> | 1.770781        | 1.735105        |               |
| <b>RSc0610</b> |                     | putative signal peptide protein                                                                | 189.637 | 34.4953 | 6.73964  | 62.1544 | OK | 253.919 | 46.688  | 13.7289  | 79.6276 | OK | 254.532 | 42.1771 | 18.0991 | 66.1172 | OK      | 216.674 | 37.9831 | 16.1291  | 55.4055 | OK      | 0.436652 | 0.29006  | 0.138958  | 1.35346         | 1.222691        | 1.101109        |               |
| <b>RSc0611</b> | <b><i>apbE</i></b>  | thiamine biosynthesis lipoprotein apbE precursor transmembran                                  | 128.791 | 11.2846 | 0.861552 | 21.7542 | OK | 155.479 | 13.6938 | 2.51286  | 24.8414 | OK | 135.602 | 11.2703 | 3.54134 | 19.0524 | OK      | 103.351 | 8.83227 | 2.83307  | 14.8028 | OK      | 0.279168 | -0.00183 | -0.3535   | 1.213494        | -1.00127        | -1.27766        |               |
| <b>RSc0612</b> |                     | hypothetical protein                                                                           | 298.145 | 46.0438 | 8.33945  | 83.7033 | OK | 107.64  | 16.776  | 0        | 38.184  | OK | 124.487 | 17.7169 | 2.9887  | 32.4487 | OK      | 70.7137 | 10.5604 | 0.746702 | 20.4596 | OK      | -1.45661 | -1.37788 | -2.12434  | <b>-2.74462</b> | <b>-2.59886</b> | <b>-4.36004</b> |               |
| <b>RSc0613</b> |                     | hypothetical protein                                                                           | 6127.19 | 960.058 | 362.803  | 1551.58 | OK | 331.199 | 52.3788 | 22.2537  | 81.3723 | OK | 252.309 | 36.3976 | 19.1814 | 51.7788 | OK      | 263.816 | 39.9621 | 19.9576  | 54.1072 | OK      | -4.19607 | -4.72121 | -4.58642  | <b>-18.3291</b> | <b>-26.377</b>  | <b>-24.0242</b> |               |
| <b>RSc0614</b> |                     | hypothetical protein                                                                           | 101.41  | 9.07063 | 4.45404  | 13.6542 | OK | 66.2398 | 5.95623 | 2.84766  | 8.98109 | OK | 112.261 | 9.51706 | 5.40235 | 13.6139 | OK      | 77.9664 | 6.80015 | 3.6736   | 9.79626 | OK      | -0.6068  | 0.069313 | -0.41564  | -1.52288        | 1.049217        | -1.33389        |               |
| <b>RSc0615</b> |                     | transcription regulator protein                                                                | 733.194 | 66.6922 | 29.7577  | 103.56  | OK | 1001.88 | 91.6231 | 39.973   | 143.163 | OK | 1823.96 | 157.145 | 84.9279 | 229.225 | OK      | 1042.57 | 92.4553 | 49.1457  | 135.461 | OK      | 0.458193 | 1.236506 | 0.471238  | 1.37382         | <b>2.356273</b> | 1.386299        |               |
| <b>RSc0616</b> |                     | hypothetical protein                                                                           | 216.003 | 31.7592 | 13.8462  | 47.3347 | OK | 281.519 | 41.7541 | 18.0323  | 62.2543 | OK | 234.525 | 31.8778 | 16.9418 | 46.1663 | OK      | 223.927 | 31.8682 | 16.2006  | 44.0486 | OK      | 0.394743 | 0.005377 |           |                 |                 |                 |               |

|         |       |                                                                                                                             |         |         |          |         |    |         |         |         |         |    |         |         |         |         |    |         |         |          |         |    |          |          |          |          |          |          |
|---------|-------|-----------------------------------------------------------------------------------------------------------------------------|---------|---------|----------|---------|----|---------|---------|---------|---------|----|---------|---------|---------|---------|----|---------|---------|----------|---------|----|----------|----------|----------|----------|----------|----------|
| RSc0663 |       | putative glycine rich transmembrane protei                                                                                  | 3293.8  | 312.864 | 134.322  | 491.211 | OK | 2948.59 | 281.652 | 121.749 | 439.077 | OK | 2825.42 | 253.75  | 136.593 | 370.072 | OK | 3038.88 | 281.265 | 148.165  | 410.308 | OK | -0.15162 | -0.30213 | -0.15361 | -1.11082 | -1.23296 | -1.11235 |
| RSc0664 |       | lipoprotein                                                                                                                 | 6538.92 | 961.425 | 367.408  | 1540.15 | OK | 5914.66 | 877.245 | 335.744 | 1406.2  | OK | 7828.26 | 1064.05 | 529.642 | 1599.3  | OK | 6487.53 | 923.274 | 440.38   | 1345.18 | OK | -0.13219 | 0.14632  | -0.05842 | -1.09596 | 1.106743 | -1.04132 |
| RSc0665 |       | dihydrodipicolinate synthase-like transmembrane protein                                                                     | 589.192 | 50.3908 | 23.2266  | 77.4923 | OK | 761.757 | 65.4796 | 29.2092 | 101.493 | OK | 782.492 | 63.5388 | 35.5499 | 91.5133 | OK | 552.111 | 46.0675 | 25.4821  | 65.6146 | OK | 0.377885 | 0.334477 | -0.12941 | 1.299436 | 1.260921 | -1.09385 |
| RSc0666 | hemL  | glutamate-1-semialdehyde 2,1-aminomutase                                                                                    | 2237.1  | 126.378 | 56.4869  | 196.319 | OK | 2868.55 | 162.591 | 73.4527 | 251.322 | OK | 2370.82 | 128.802 | 72.6563 | 184.544 | OK | 2265.56 | 125.333 | 69.9238  | 180.104 | OK | 0.363502 | 0.02741  | -0.01198 | 1.286545 | 1.019181 | -1.00834 |
| RSc0667 |       | rubredoxin protein                                                                                                          | 529.36  | 906.493 | 108.039  | 409.281 | OK | 533.598 | 956.769 | 108.743 | 433.563 | OK | 648.001 | 756.42  | 148.935 | 453.053 | OK | 689.912 | 1102.36 | 158.655  | 486.034 | OK | 0.077875 | -0.26111 | 0.282228 | 1.055462 | -1.1984  | 1.216071 |
| RSc0668 | pilG  | twitching motility two-component response regulator transcription regulator protein                                         | 6305.67 | 1074.24 | 396.305  | 1712.71 | OK | 7026.93 | 1209.25 | 438.881 | 1918.2  | OK | 4614.93 | 719.665 | 350.13  | 1055.8  | OK | 4505.73 | 740.801 | 342.129  | 1115.8  | OK | 0.170796 | -0.57792 | -0.53616 | 1.12568  | -1.49269 | -1.45011 |
| RSc0669 | pilH  | putative twitching motility two-component response regulator transcription regulator protein                                | 6531.82 | 2024.69 | 600.203  | 2831.72 | OK | 8032.49 | 2534    | 724.642 | 3521.11 | OK | 6326.63 | 1700.18 | 697.815 | 2306.25 | OK | 5609.05 | 1653.3  | 619.304  | 2044.2  | OK | 0.323715 | -0.25201 | -0.29235 | 1.25155  | -1.19087 | -1.22464 |
| RSc0670 | pilI  | putative twitching motility protein                                                                                         | 4465.08 | 748.798 | 284.615  | 1186.11 | OK | 5745.38 | 973.12  | 360.457 | 1537.13 | OK | 2523.09 | 387.748 | 191.875 | 567.014 | OK | 2224.76 | 360.187 | 169.767  | 537.924 | OK | 0.378041 | -0.94946 | -1.05583 | 1.299576 | -1.93115 | 2.07891  |
| RSc0671 | pilJ  | putative twitching motility transmembrane protei                                                                            | 22653   | 704.768 | 248.342  | 1161.99 | OK | 36328.8 | 1132.32 | 382.366 | 1882.06 | OK | 23913.8 | 723.674 | 352.754 | 1093.98 | OK | 23830.5 | 728.435 | 357.536  | 1098.79 | OK | 0.684061 | 0.038192 | 0.047652 | 1.606656 | 1.026826 | 1.033581 |
| RSc0672 |       | putative composite two component regulatory (sensor histidine kinase and response regulator hybrid) transcription regulator | 22235.2 | 239.259 | 77.6227  | 400.466 | OK | 37830.3 | 407.327 | 125.963 | 689.867 | OK | 29091.2 | 307.297 | 141.161 | 473.557 | OK | 23370   | 247.727 | 119.374  | 375.97  | OK | 0.767614 | 0.36106  | 0.050178 | 1.702452 | 1.28437  | 1.035393 |
| RSc0673 |       | hypothetical protein                                                                                                        | 23.3243 | 11.3867 | 2.87702  | 11.2868 | OK | 26.6799 | 13.3522 | 3.31964 | 13.4999 | OK | 12.2264 | 4.89889 | 1.30993 | 6.11301 | OK | 27.1976 | 12.4941 | 3.49315  | 12.6627 | OK | 0.229728 | -1.21682 | 0.133897 | 1.172614 | 2.32434  | 1.097254 |
| RSc0674 | rsuA  | ribosomal small subunit pseudouridine synthase A protein                                                                    | 1306.16 | 140.9   | 59.0554  | 222.222 | OK | 1423.23 | 154.512 | 64.1464 | 244.622 | OK | 1130.39 | 114.647 | 61.1042 | 168.162 | OK | 1290.98 | 135.474 | 70.0605  | 200.388 | OK | 0.133047 | -0.29747 | -0.05666 | 1.096608 | -1.22899 | -1.04005 |
| RSc0675 |       | hypothetical protein                                                                                                        | 5324.03 | 834.212 | 267.157  | 1388.39 | OK | 5818.06 | 920.12  | 298.065 | 1533.71 | OK | 5982.06 | 862.96  | 380.192 | 1341.04 | OK | 6296.24 | 953.734 | 419.109  | 1465.99 | OK | 0.141408 | 0.04888  | 0.193173 | 1.102981 | 1.034461 | 1.143275 |
| RSc0676 |       | Holliday junction resolvase-like protei                                                                                     | 1091.17 | 257.2   | 5.32974  | 508.546 | OK | 1065.36 | 254.603 | 4.73754 | 504.104 | OK | 1616.11 | 339.528 | 55.791  | 621.587 | OK | 1218.45 | 275.058 | 31.8388  | 517.6   | OK | -0.01464 | 0.40064  | 0.096845 | -1.0102  | 1.320093 | 1.069432 |
| RSc0677 | pyrR  | pyrimidine regulatory protein PyrR                                                                                          | 1090.16 | 193.389 | 0.177396 | 541.057 | OK | 1053.4  | 188.84  | 0       | 547.126 | OK | 1630.56 | 263.994 | 7.60948 | 561.483 | OK | 1264.69 | 216.328 | 1.88158  | 492.29  | OK | -0.03434 | 0.448999 | 0.161715 | -1.02409 | 1.365093 | 1.118616 |
| RSc0678 | pyrB  | aspartate carbamoyltransferase catalytic subunit                                                                            | 3176.16 | 252.527 | 112.238  | 391.044 | OK | 4615.62 | 368.702 | 160.472 | 574.971 | OK | 3504.54 | 265.247 | 145.038 | 385.307 | OK | 4065.13 | 315.566 | 169.222  | 460.473 | OK | 0.546018 | 0.070899 | 0.321504 | 1.46005  | 1.050371 | 1.249633 |
| RSc0679 | pyrX  | dihydroorotase                                                                                                              | 4641.54 | 267.848 | 112.374  | 422.587 | OK | 7566.97 | 438.155 | 167.805 | 708.159 | OK | 5928.71 | 328.845 | 180.404 | 475.194 | OK | 7102.19 | 401.288 | 217.041  | 584.262 | OK | 0.710027 | 0.295993 | 0.583223 | 1.635835 | 1.22773  | 1.498193 |
| RSc0680 | plsC  | 1-acyl-sn-glycerol-3-phosphate acyltransferase transmembrane                                                                | 580.065 | 58.4608 | 0        | 176.673 | OK | 1129.76 | 114.541 | 0       | 335.586 | OK | 631.329 | 60.0077 | 0.1901  | 150.844 | OK | 837.685 | 82.2031 | 0.294394 | 202.935 | OK | 0.970323 | 0.037678 | 0.491723 | 1.959279 | 1.02646  | 1.406123 |
| RSc0681 | apaH  | diadenosine tetraphosphatase                                                                                                | 907.62  | 84.7117 | 37.2649  | 132.128 | OK | 1045.12 | 98.0846 | 42.5561 | 153.368 | OK | 674.677 | 59.5818 | 33.0334 | 85.4545 | OK | 767.878 | 69.8504 | 37.5821  | 102.083 | OK | 0.211465 | -0.50769 | -0.27829 | 1.157864 | -1.42177 | -1.21276 |
| RSc0682 | rfbB  | dTDP-glucose 4,6-dehydratase protein                                                                                        | 5247.97 | 374.277 | 108.605  | 639.837 | OK | 7407.81 | 530.545 | 144.706 | 916.066 | OK | 3518.99 | 239.775 | 112.746 | 365.441 | OK | 4975.34 | 346.814 | 164.287  | 528.833 | OK | 0.503369 | -0.64243 | -0.10994 | 1.41752  | -1.56095 | -1.07919 |
| RSc0683 | rfbD  | dTDP-4-dehydroorhamnose reductase oxidoreductase protein                                                                    | 3268.44 | 278.425 | 13.9705  | 566.827 | OK | 4524.54 | 387.372 | 10.702  | 803.248 | OK | 2232.99 | 180.628 | 52.0934 | 309.649 | OK | 2784.13 | 231.393 | 56.1833  | 407.246 | OK | 0.476431 | -0.62427 | -0.26694 | 1.391297 | -1.54143 | -1.20326 |
| RSc0684 | rfbA  | glucose-1-phosphate thymidyltransferase protein                                                                             | 2603.19 | 233.817 | 87.0402  | 378.713 | OK | 4777.54 | 431.4   | 145.946 | 715.298 | OK | 2510.87 | 213.717 | 104.802 | 322.211 | OK | 4030.68 | 353.006 | 173.465  | 530.442 | OK | 0.883646 | -0.12968 | 0.594313 | 1.845033 | -1.09405 | 1.509753 |
| RSc0685 | rfbC  | dTDP-4-dehydroorhamnose 3,5-epimerase protei                                                                                | 1139.85 | 188.214 | 4.29317  | 402.733 | OK | 2358.87 | 393.329 | 4.5021  | 827.053 | OK | 1319.34 | 199.856 | 47.2621 | 352.345 | OK | 1582.9  | 252.411 | 42.5761  | 464.988 | OK | 1.063363 | 0.086587 | 0.423401 | 2.089797 | 1.061855 | 1.341085 |
| RSc0686 |       | putative lipopolysaccharide O-SIDE chain biosynthesis transmembrane protein                                                 | 836.633 | 48.6718 | 22.3805  | 74.8554 | OK | 1457.27 | 85.0699 | 37.4023 | 132.456 | OK | 681.346 | 38.0912 | 22.0283 | 54.1195 | OK | 1173.12 | 66.8185 | 37.0976  | 96.3738 | OK | 0.805563 | -0.35363 | 0.457161 | 1.747827 | -1.27777 | 1.372838 |
| RSc0687 | rfbF  | dTDP-rhamnosyl transferase rfbF protein                                                                                     | 1576.93 | 132.233 | 57.4069  | 206.429 | OK | 2090.23 | 176.147 | 76.7272 | 275.539 | OK | 1073.7  | 85.5453 | 47.068  | 123.989 | OK | 1743.36 | 142.654 | 76.6478  | 208.015 | OK | 0.413698 | -0.62832 | 0.109438 | 1.332096 | -1.54577 | 1.078808 |
| RSc0688 |       | glycosyl transferase protein                                                                                                | 4697.31 | 454.218 | 192.581  | 715.644 | OK | 4600.9  | 447.446 | 188.614 | 700.711 | OK | 3476.76 | 317.634 | 170.108 | 463.596 | OK | 3940.93 | 371.246 | 194.508  | 547.691 | OK | -0.02167 | -0.51602 | -0.29101 | -1.01513 | -1.43    | -1.2235  |
| RSc0689 |       | putative undecaprenyl phosphate N-acetylglucosaminyltransferase transmembrane protein                                       | 1948.09 | 130.685 | 34.726   | 226.724 | OK | 1798.59 | 121.136 | 32.1431 | 209.963 | OK | 1586.1  | 101.847 | 44.2796 | 159.452 | OK | 1779.63 | 116.75  | 52.5466  | 180.799 | OK | -0.10947 | -0.35969 | -0.16267 | -1.07883 | -1.28315 | -1.11936 |
| RSc0690 |       | Lipopolysaccharide biosynthesis protein                                                                                     | 2043.41 | 177.593 | 28.4196  | 326.348 | OK | 1942.11 | 169.659 | 24.1981 | 314.925 | OK | 1648.35 | 135.932 | 51.211  | 220.677 | OK | 1594.68 | 135.189 | 48.7456  | 221.347 | OK | -0.06594 | -0.38569 | -0.3936  | -1.04676 | -1.30648 | -1.31366 |
| RSc0691 |       | putative phosphomannomutase or phosphoglucomutase protein                                                                   | 5247.97 | 276.121 | 121.042  | 431.106 | OK | 4841.94 | 255.551 | 397.423 | 397.743 | OK | 4329.27 | 219.439 | 122.388 | 315.962 | OK | 4236.48 | 218.392 | 121.425  | 315.366 | OK | -0.11169 | -0.33148 | -0.33838 | -1.08049 | -1.2583  | -1.26434 |
| RSc0692 | rfaC1 | lipopolysaccharide heptosyltransferase protei                                                                               | 1320.36 | 101.591 | 37.9057  | 165.354 | OK | 1262.24 | 97.5616 | 35.5205 | 159.423 | OK | 944.771 | 69.2781 | 36.44   | 101.879 | OK | 965.514 | 72.5569 | 35.7405  | 109.32  | OK | -0.05839 | -0.5523  | -0.48559 | -1.0413  | -1.46642 | -1.40016 |
| RSc0693 | kdtA  | 3-deoxy-D-manno-octulosonic-acid transferase                                                                                | 567.896 | 31.6648 | 0.724856 | 68.8056 | OK | 603.518 | 33.762  | 1.90203 | 70.8786 | OK | 333.448 | 17.8862 | 3.16477 | 32.6132 | OK | 475.958 | 25.991  | 6.2253   | 45.7614 | OK | 0.09252  | -0.82403 | -0.28487 | 1.066231 | -1.77035 | -1.2183  |
| RSc0694 |       | hypothetical protein                                                                                                        | 1339.63 | 149.002 | 61.5329  | 236.311 | OK | 1828.95 | 204.771 | 85.1727 | 324.178 | OK | 1218.2  | 127.209 | 67.0468 | 187.08  | OK | 1243.84 | 134.527 | 69.276   | 198.74  | OK | 0.45868  | -0.22813 | -0.14744 | 1.374284 | -1.17132 | -1.1076  |
| RSc0695 |       | porin (omp) ABC transporter protein                                                                                         | 3023.03 | 150.569 | 68.296   | 232.886 | OK | 4337.78 | 216.689 | 96.6679 | 336.611 | OK | 2973.25 | 142.842 | 80.4734 | 205.179 | OK | 3320.82 | 162.114 | 90.6908  | 233.517 | OK | 0.525201 | -0.076   | 0.106584 | 1.439134 | -1.05409 | 1.076676 |
| RSc0696 |       | hypothetical protein                                                                                                        | 961.367 | 359.047 | 102.887  | 419.863 | OK | 1121.48 | 427.487 | 118.359 | 492.194 | OK | 903.645 | 286.421 | 113.517 | 354.098 | OK | 839.499 | 296.746 | 105.886  | 323.191 | OK | 0.251708 | -0.32604 | -0.27494 | 1.190616 | -1.25356 | -1.20995 |
| RSc0697 | pcm   | protein-L-isoaspartate O-methyltransferase                                                                                  | 2613.34 | 344.171 | 140.277  | 546.568 | OK | 2841.87 | 377.197 | 153.731 | 600.186 | OK | 2295.24 | 281.287 | 146.581 | 412.516 | OK | 1965.48 | 251.038 | 124.916  | 371.43  | OK | 0.132193 | -0.29108 | -0.45522 | 1.095958 | -1.22356 | -1.37099 |
| RSc0698 |       | putative transcription regulator protein                                                                                    | 2263.47 | 230.282 | 98.1001  | 359.916 | OK | 1720.39 | 176.086 | 74.0409 | 278.18  | OK | 1678.36 | 160.973 | 86.0673 | 235.347 | OK | 1801.39 | 178.426 | 93.9788  | 261.478 | OK | -0.38712 | -0.51658 | -0.36808 | -1.30778 | -1.43056 | -1.29063 |
| RSc0699 |       | hypothetical protein                                                                                                        | 17.2397 | 25.0129 | 0        | 48.3007 | OK | 16.5599 | 25.0892 | 0       | 49.6424 | OK | 35.5678 | 36.1314 | 2.31626 | 67.5023 | OK | 20.8515 | 28.2355 | 0.661787 | 47.6487 | OK | 0.004394 | 0.530581 | 0.174838 | 1.00305  | 1.444511 | 1.128838 |
| RSc0700 |       | hypothetical protein                                                                                                        | 291.047 | 41.3761 | 18.7655  | 64.1156 | OK | 319.239 | 45.7677 | 21.0747 | 70.5356 | OK | 330.114 | 43.4754 | 24.8909 | 62.0298 | OK | 309.146 | 42.5659 | 24.5086  | 60.7207 | OK | 0.145532 | 0.071402 | 0.0409   | 1.106139 | 1.050737 | 1.028756 |
| RSc0701 | uppP  | undecaprenyl pyrophosphate phosphatase                                                                                      | 3       |         |          |         |    |         |         |         |         |    |         |         |         |         |    |         |         |          |         |    |          |          |          |          |          |          |

|         |              |                                                                                     |         |         |          |         |    |         |         |          |         |    |         |         |          |         |    |         |         |         |         |    |          |          |          |                 |                 |                 |
|---------|--------------|-------------------------------------------------------------------------------------|---------|---------|----------|---------|----|---------|---------|----------|---------|----|---------|---------|----------|---------|----|---------|---------|---------|---------|----|----------|----------|----------|-----------------|-----------------|-----------------|
| RSc0737 |              | hypothetical protein                                                                | 4529.98 | 440.02  | 186.724  | 691.94  | OK | 5972.62 | 583.491 | 240.196  | 924.954 | OK | 4998.39 | 458.628 | 244.038  | 671.895 | OK | 5753.19 | 544.387 | 281.156 | 806.428 | OK | 0.407141 | 0.059755 | 0.307064 | 1.326056        | 1.042289        | 1.237187        |
| RSc0738 |              | putative signal peptide protein                                                     | 692.63  | 86.9504 | 37.2095  | 136.339 | OK | 780.157 | 98.6685 | 41.6937  | 154.944 | OK | 634.664 | 74.338  | 39.6249  | 108.898 | OK | 615.572 | 75.0041 | 38.4954 | 108.427 | OK | 0.182397 | -0.22609 | -0.21322 | 1.134768        | -1.16966        | -1.15928        |
| RSc0739 |              | hypothetical protein                                                                | 561.811 | 37.9256 | 18.0623  | 57.7647 | OK | 685.397 | 46.4532 | 21.2939  | 71.5567 | OK | 446.821 | 28.8663 | 16.7937  | 40.7604 | OK | 490.463 | 32.3768 | 18.4447 | 46.2824 | OK | 0.292606 | -0.39379 | -0.22821 | 1.224851        | -1.31384        | -1.17138        |
| RSc0740 |              | hypothetical protein                                                                | 344.794 | 113.323 | 37.1614  | 141.43  | OK | 111.32  | 37.2686 | 12.0865  | 43.1144 | OK | 102.258 | 28.9488 | 12.1013  | 35.414  | OK | 93.3783 | 29.1398 | 11.0335 | 32.2107 | OK | -1.60441 | -1.96887 | -1.95938 | <b>-3.04071</b> | <b>-3.9146</b>  | <b>-3.88894</b> |
| RSc0741 | <i>che</i>   | chemotaxis response regulator transcription regulator proteir                       | 792.012 | 209.564 | 70.6026  | 282.092 | OK | 679.877 | 182.671 | 60.9027  | 241.384 | OK | 351.232 | 81.9165 | 37.4915  | 102.435 | OK | 454.2   | 114.754 | 48.1585 | 141.966 | OK | -0.19814 | -1.35516 | -0.86885 | -1.14722        | <b>-2.55826</b> | -1.8262         |
| RSc0742 | <i>cheZ2</i> | chemotaxis regulator CheZ                                                           | 2416.6  | 316.32  | 129.196  | 503.49  | OK | 1448.99 | 191.141 | 76.4146  | 305.166 | OK | 898.088 | 109.43  | 57.4116  | 161.258 | OK | 1800.48 | 228.585 | 114.435 | 337.475 | OK | -0.72675 | -1.53138 | -0.46865 | -1.6549         | <b>-2.89062</b> | -1.38382        |
| RSc0743 | <i>aroG2</i> | phospho-2-dehydro-3-deoxyheptonate aldolase                                         | 5891.92 | 373.101 | 161.904  | 582.668 | OK | 8313.09 | 528.392 | 220.187  | 833.444 | OK | 3994.71 | 242.536 | 134.984  | 349.882 | OK | 8795.7  | 544.955 | 292.601 | 793.579 | OK | 0.502042 | -0.62137 | 0.546571 | 1.416217        | -1.53833        | 1.46061         |
| RSc0744 |              | putative DNA/RNA non-specific endonuclease protein                                  | 1108.41 | 107.18  | 46.2785  | 167.847 | OK | 1440.71 | 140.112 | 59.2676  | 220.348 | OK | 658.005 | 60.1149 | 33.2236  | 86.7805 | OK | 1265.59 | 119.222 | 62.841  | 174.865 | OK | 0.386545 | -0.83424 | 0.153615 | 1.307259        | -1.78292        | 1.112353        |
| RSc0745 |              | hypothetical protein                                                                | 214.989 | 42.7226 | 17.0941  | 63.3409 | OK | 244.719 | 49.2044 | 19.4793  | 72.2192 | OK | 127.822 | 22.9787 | 11.2422  | 31.3736 | OK | 163.185 | 31.1881 | 14.5103 | 40.2628 | OK | 0.203788 | -0.8947  | -0.454   | 1.151718        | -1.85923        | -1.36984        |
| RSc0746 | <i>tauD</i>  | putative alpha-ketoglutarate-dependent taurine dioxigenase oxidoreductase protein   | 350.879 | 30.372  | 14.7141  | 45.9905 | OK | 419.518 | 36.4997 | 17.3442  | 55.5867 | OK | 374.574 | 30.7695 | 17.8113  | 43.6867 | OK | 447.853 | 37.8154 | 21.037  | 54.5558 | OK | 0.265143 | 0.018759 | 0.316232 | 1.201755        | 1.013088        | 1.245074        |
| RSc0747 |              | putative Nudix hydrolase protein                                                    | 248.455 | 53.3128 | 20.77    | 74.5769 | OK | 263.119 | 57.1769 | 22.0246  | 79.177  | OK | 230.079 | 44.3751 | 21.5897  | 61.4689 | OK | 301.893 | 62.1869 | 28.3279 | 81.2709 | OK | 0.10095  | -0.26473 | 0.222129 | 1.07248         | -1.20141        | 1.166453        |
| RSc0748 |              | hypothetical protein                                                                | 463.444 | 45.4277 | 21.0738  | 69.3549 | OK | 553.838 | 54.6038 | 24.691   | 84.2953 | OK | 549.078 | 50.8212 | 28.3138  | 72.9178 | OK | 670.874 | 64.0528 | 34.442  | 93.552  | OK | 0.265429 | 0.161858 | 0.495689 | 1.201993        | 1.118727        | 1.409994        |
| RSc0749 |              | ABC transporter ATP-binding protein                                                 | 974.55  | 118.195 | 49.8109  | 186.419 | OK | 811.437 | 99.1207 | 42.0047  | 155.845 | OK | 1141.51 | 129.41  | 68.0237  | 190.136 | OK | 864.883 | 101.865 | 52.1637 | 146.59  | OK | -0.25391 | 0.13078  | -0.21451 | -1.19244        | 1.094886        | -1.16031        |
| RSc0750 |              | hypothetical protein                                                                | 2519.02 | 748.808 | 235.285  | 962.948 | OK | 2883.27 | 871.743 | 270.041  | 1099.08 | OK | 4190.34 | 1084.8  | 454.974  | 1482.74 | OK | 3105.06 | 878.654 | 339.507 | 1092.64 | OK | 0.219307 | 0.534761 | 0.230699 | 1.164174        | 1.448702        | 1.173404        |
| RSc0751 |              | hypothetical protein                                                                | 3141.68 | 548.266 | 179.134  | 914.591 | OK | 2414.99 | 425.825 | 140.809  | 709.017 | OK | 2473.08 | 394.37  | 178.87   | 607.199 | OK | 1857.59 | 312.696 | 132.567 | 488.272 | OK | -0.36462 | -0.47533 | -0.81012 | -1.28754        | -1.39023        | -1.75335        |
| RSc0752 |              | hypothetical protein                                                                | 1562.73 | 464.538 | 20.8083  | 951.235 | OK | 1184.04 | 357.988 | 17.8384  | 744.979 | OK | 1291.56 | 334.36  | 78.4411  | 591.027 | OK | 1143.2  | 323.498 | 92.5328 | 554.914 | OK | -0.37589 | -0.47439 | -0.52204 | -1.29764        | -1.38933        | -1.43598        |
| RSc0753 |              | hypothetical protein                                                                | 19802.3 | 7655.11 | 1845.96  | 11818.9 | OK | 13728.2 | 5419.48 | 1331.35  | 8022.16 | OK | 14740.6 | 4816.18 | 1775.97  | 5806.44 | OK | 13716.6 | 5014.53 | 1666.2  | 5371.04 | OK | -0.49827 | -0.66853 | -0.61031 | -1.41252        | -1.58946        | -1.52659        |
| RSc0754 |              | antioxidant oxidoreductase protein                                                  | 11928.9 | 1610.53 | 592.408  | 2627.94 | OK | 4066.38 | 553.411 | 222.632  | 878.03  | OK | 6494.46 | 814.773 | 412.707  | 1214.86 | OK | 4196.59 | 549.254 | 269.438 | 812.986 | OK | -1.54111 | -0.98307 | -1.55199 | <b>-2.91019</b> | -1.97666        | <b>-2.93221</b> |
| RSc0755 |              | hypothetical protein                                                                | 1147.96 | 60.5483 | 26.9152  | 94.1568 | OK | 487.598 | 25.7982 | 12.5263  | 39.0224 | OK | 572.42  | 29.084  | 16.9969  | 40.9763 | OK | 650.022 | 33.5907 | 19.3397 | 47.8669 | OK | -1.23082 | -1.05786 | -0.85002 | <b>-2.347</b>   | <b>-2.08184</b> | -1.80253        |
| RSc0756 | <i>gcdH</i>  | glutaryl-CoA dehydrogenase oxidoreductase                                           | 1461.32 | 82.1203 | 32.6436  | 131.411 | OK | 930.117 | 52.4426 | 18.9559  | 85.9665 | OK | 1661.68 | 89.8155 | 49.0087  | 130.706 | OK | 933.783 | 51.3895 | 27.3944 | 75.3831 | OK | -0.647   | 0.129226 | -0.67627 | -1.56591        | 1.093706        | -1.598          |
| RSc0757 |              | putative transcription regulator protein                                            | 294.089 | 28.6961 | 0.097576 | 73.8653 | OK | 392.839 | 38.5536 | 0.392564 | 84.1068 | OK | 290.1   | 26.734  | 0.460772 | 58.2416 | OK | 277.415 | 26.3678 | 3.04154 | 50.1854 | OK | 0.426011 | -0.10218 | -0.12208 | 1.343514        | 1.07309         | -1.0883         |
| RSc0758 |              | putative tryptophan-2,3-dioxygenase                                                 | 744.349 | 66.3022 | 29.6172  | 102.969 | OK | 1900.71 | 170.198 | 73.3516  | 266.409 | OK | 730.252 | 61.6612 | 34.4578  | 88.7289 | OK | 1277.38 | 110.955 | 59.009  | 162.885 | OK | 1.360085 | -0.10469 | 0.742846 | <b>2.567004</b> | -1.07527        | 1.673474        |
| RSc0759 |              | Kynureninase protein                                                                | 717.983 | 42.343  | 19.5155  | 64.9146 | OK | 2098.51 | 124.191 | 55.1055  | 193.254 | OK | 709.134 | 40.175  | 23.0517  | 57.148  | OK | 1198.51 | 69.1948 | 38.3013 | 99.6544 | OK | 1.552365 | -0.07583 | 0.70854  | <b>2.932976</b> | -1.05396        | 1.63415         |
| RSc0760 |              | putative peptidase protein                                                          | 179.496 | 24.6999 | 11.1424  | 37.925  | OK | 408.478 | 56.6693 | 24.6359  | 87.708  | OK | 166.724 | 21.2951 | 11.4962  | 30.959  | OK | 219.394 | 29.2659 | 15.1266 | 41.1443 | OK | 1.198062 | -0.21398 | 0.244272 | <b>2.294313</b> | -1.15899        | 1.184495        |
| RSc0761 |              | transcription regulator protein                                                     | 285.976 | 49.9067 | 20.7393  | 75.4377 | OK | 349.599 | 61.6432 | 25.348   | 93.0236 | OK | 248.975 | 39.7029 | 20.3397  | 55.1564 | OK | 190.383 | 32.0479 | 15.5539 | 43.0723 | OK | 0.304708 | -0.32999 | -0.639   | 1.235169        | -1.257          | -1.55725        |
| RSc0762 |              | hypothetical protein                                                                | 2187.41 | 2500.92 | 370.228  | 1533.18 | OK | 1230.96 | 1463.83 | 207.514  | 870.813 | OK | 1486.07 | 1234.76 | 296.174  | 950.826 | OK | 3172.14 | 3385.78 | 633.474 | 2039.15 | OK | -0.77271 | -1.01823 | 0.437029 | -1.70848        | <b>-2.02543</b> | 1.353814        |
| RSc0763 |              | putative monooxygenase oxidoreductase protein                                       | 4523.9  | 703.706 | 273.481  | 1132.94 | OK | 2595.31 | 407.445 | 159.214  | 650.718 | OK | 2564.22 | 367.406 | 184.749  | 546.416 | OK | 5064.19 | 761.659 | 358.689 | 1090.29 | OK | -0.78837 | -0.9376  | 0.114172 | -1.91534        | 1.082354        |                 |
| RSc0764 | <i>msrA</i>  | methionine sulfoxide reductase A                                                    | 5006.61 | 778.794 | 300.091  | 1256.83 | OK | 4527.3  | 710.754 | 273.704  | 1139.09 | OK | 8909.74 | 1276.6  | 620.757  | 1910.58 | OK | 6146.65 | 924.462 | 433.14  | 1329.31 | OK | -0.13189 | 0.712993 | 0.247372 | -1.09573        | 1.639201        | 1.187043        |
| RSc0765 |              | hypothetical protein                                                                | 2358.8  | 167.669 | 74.7124  | 260.559 | OK | 1883.23 | 134.428 | 59.2151  | 208.881 | OK | 1886.21 | 128.109 | 71.0269  | 185.003 | OK | 1693.5  | 117.661 | 64.1265 | 170.786 | OK | -0.31878 | -0.38824 | -0.51098 | -1.24728        | -1.3088         | -1.42502        |
| RSc0766 | <i>cfa2</i>  | putative cyclopropane-fatty-acyl-phospholipid synthase protein                      | 4553.31 | 276.899 | 123.053  | 430.078 | OK | 2301.83 | 140.484 | 62.344   | 218.415 | OK | 2634.24 | 153.764 | 86.2698  | 220.617 | OK | 2421.49 | 144.125 | 79.8177 | 207.713 | OK | -0.97895 | -0.84864 | -0.94204 | -1.97104        | -1.80081        | -1.92124        |
| RSc0767 | <i>pdxH1</i> | pyridoxamine 5'-phosphate oxidase                                                   | 539.501 | 72.8385 | 31.3438  | 113.483 | OK | 492.198 | 66.9853 | 28.925   | 103.001 | OK | 611.322 | 76.6944 | 40.2665  | 110.758 | OK | 514.034 | 67.2773 | 34.4999 | 95.4465 | OK | -0.12086 | 0.07442  | -0.11458 | -1.08738        | 1.052938        | -1.08266        |
| RSc0770 |              | putative transmembrane dehydrogenase (small subunit) oxidoreductase protein         | 327.554 | 63.9102 | 0.261793 | 127.493 | OK | 43.2398 | 8.53445 | 0        | 17.0165 | OK | 47.7943 | 8.44858 | 1.67868  | 15.2373 | OK | 77.9664 | 14.6368 | 1.80781 | 27.3754 | OK | -2.90468 | -2.91927 | -2.12645 | <b>-7.4885</b>  | <b>-7.56461</b> | <b>-4.36641</b> |
| RSc0771 |              | putative transmembrane dehydrogenase (large subunit) oxidoreductase protein         | 2576.83 | 113.82  | 41.1228  | 186.4   | OK | 439.758 | 19.4751 | 7.97147  | 30.9559 | OK | 264.536 | 11.2991 | 6.36425  | 16.231  | OK | 575.682 | 24.9411 | 13.6472 | 36.3059 | OK | -2.54705 | -3.33247 | -2.19016 | <b>-5.84439</b> | <b>-10.0734</b> | <b>-4.56355</b> |
| RSc0772 |              | putative oxidoreductase dehydrogenase (cytochrome C subunit) signal peptide protein | 1730.05 | 98.7736 | 43.7827  | 153.564 | OK | 859.277 | 49.2242 | 22.5154  | 75.8833 | OK | 589.092 | 32.3362 | 18.8625  | 45.8018 | OK | 536.699 | 30.0043 | 17.3358 | 42.5514 | OK | -1.00476 | -1.61098 | -1.71896 | <b>-2.00661</b> | <b>-3.05458</b> | <b>-3.29198</b> |
| RSc0773 |              | hypothetical protein                                                                | 2691.42 | 84.0998 | 37.3138  | 130.859 | OK | 1743.39 | 54.577  | 23.8136  | 85.3175 | OK | 1281.55 | 38.949  | 22.4918  | 55.4151 | OK | 1764.22 | 54.1619 | 30.8656 | 77.221  | OK | -0.62381 | -1.11052 | -0.63482 | -1.54094        | <b>-2.15923</b> | -1.55275        |
| RSc0774 |              | hypothetical protein                                                                | 922.831 | 80.2035 | 35.4455  | 124.879 | OK | 1025.8  | 89.6113 | 39.1541  | 139.5   | OK | 574.643 | 47.3881 | 26.665   | 68.1047 | OK | 700.791 | 59.4095 | 32.2935 | 85.0606 | OK | 0.160015 | -0.75914 | -0.43297 | 1.117299        | -1.69248        | -1.35001        |
| RSc0775 | <i>katGb</i> | peroxidase/catalase oxidoreductase protein                                          | 31377.4 | 1675.56 | 88.6978  | 3260.08 | OK | 27722.3 | 1485.05 | 93.1027  | 2923.68 | OK | 10542.7 | 542.165 | 185.699  | 899.591 | OK | 32059.8 | 1677.19 | 202.144 | 3160.9  | OK | -0.17413 | -1.62784 | 0.001403 | -1.12829        | <b>-3.0905</b>  | 1.000973        |
| RSc0776 | <i>katGa</i> | peroxidase/catalase oxidoreductase protein                                          | 20915.6 | 1788.82 | 51.2296  | 3907.31 | OK | 18705.3 | 1607.89 | 51.8331  | 3475.57 | OK | 7680.3  | 623.645 | 133.007  | 1114.4  | OK | 23168.5 | 1933.16 | 77.765  | 3848.28 | OK | -0.15384 | -1.52021 | 0.111953 | -1.11253        | <b>-2.86833</b> | 1.08069         |
| RSc0777 |              | hypothetical protein                                                                | 2345.61 |         |          |         |    |         |         |          |         |    |         |         |          |         |    |         |         |         |         |    |          |          |          |                 |                 |                 |

|         |                     |                                                      |         |          |          |          |    |         |          |          |          |    |         |          |          |          |    |          |          |          |          |    |          |          |          |                 |                 |                 |
|---------|---------------------|------------------------------------------------------|---------|----------|----------|----------|----|---------|----------|----------|----------|----|---------|----------|----------|----------|----|----------|----------|----------|----------|----|----------|----------|----------|-----------------|-----------------|-----------------|
| RSc0820 |                     | putative transcription regulator protein             | 317.413 | 39.6153  | 18.0475  | 60.8865  | OK | 247.479 | 31.116   | 14.153   | 47.9683  | OK | 355.678 | 41.4314  | 22.5828  | 59.7834  | OK | 232.993  | 28.2265  | 14.899   | 40.574   | OK | -0.3484  | 0.064667 | -0.48901 | -1.27315        | 1.045843        | -1.40348        |
| RSc0821 |                     | putative NADPH nitroreductase protein                | 113.579 | 12.9004  | 6.00723  | 19.2585  | OK | 77.2797 | 8.83667  | 4.06371  | 13.6046  | OK | 115.595 | 12.3138  | 6.71047  | 17.6912  | OK | 106.071  | 11.7113  | 6.18758  | 16.7326  | OK | -0.54584 | -0.06714 | -0.13951 | -1.45987        | -1.04764        | -1.10153        |
| RSc0822 |                     | hypothetical protein                                 | 37.5217 | 16.5199  | 4.63014  | 18.0996  | OK | 27.5999 | 12.4355  | 3.36737  | 13.0486  | OK | 53.3517 | 19.5364  | 7.05907  | 21.3848  | OK | 26.291   | 10.9148  | 3.11429  | 11.6267  | OK | -0.40974 | 0.24196  | -0.59792 | -1.32845        | 1.182598        | -1.51353        |
| RSc0824 | <i>ripAG</i>        | Type III effector protein                            | 240.342 | 112.453  | 31.4416  | 115.792  | OK | 167.439 | 80.2542  | 22.1175  | 77.1944  | OK | 210.073 | 81.1168  | 30.5893  | 87.0618  | OK | 199.449  | 87.8853  | 29.0919  | 79.7888  | OK | -0.48667 | -0.47125 | -0.35563 | -1.40121        | -1.38631        | -1.27954        |
| RSc0830 |                     | hypothetical protein                                 | 172.397 | 14.0183  | 6.95315  | 21.062   | OK | 1007.4  | 82.3098  | 36.3184  | 128.194  | OK | 968.112 | 74.8788  | 41.2889  | 107.884  | OK | 714.39   | 56.7035  | 31.233   | 81.9784  | OK | 2.553753 | 2.417246 | 2.016126 | <b>5.871596</b> | <b>5.341504</b> | <b>4.044963</b> |
| RSc0834 |                     | hypothetical protein                                 | 19.2679 | 3.69239  | 0.387958 | 6.98324  | OK | 21.1599 | 4.10115  | 0.517277 | 7.62984  | OK | 20.0069 | 3.47854  | 0.765441 | 6.12353  | OK | 26.291   | 4.84969  | 1.02059  | 8.675    | OK | 0.151474 | -0.08607 | 0.393338 | 1.110703        | -1.06148        | 1.313428        |
| RSc0835 |                     | hypothetical protein                                 | 107.495 | 9.73657  | 4.25713  | 15.1264  | OK | 101.2   | 9.2156   | 4.0068   | 14.388   | OK | 95.5886 | 8.20214  | 4.46195  | 12.0129  | OK | 121.483  | 10.7281  | 5.82847  | 15.5426  | OK | -0.07934 | -0.24741 | 0.139909 | -1.05653        | -1.18708        | 1.101836        |
| RSc0836 |                     | hypothetical protein                                 | 102.424 | 14.0045  | 6.30784  | 21.3653  | OK | 69.9197 | 9.63787  | 4.27305  | 14.8539  | OK | 80.0276 | 10.1604  | 5.31939  | 14.8541  | OK | 77.0598  | 10.2119  | 5.11866  | 14.6534  | OK | -0.5391  | -0.46293 | -0.45564 | -1.45307        | -1.37834        | -1.37139        |
| RSc0839 |                     | hypothetical protein                                 | 14.1974 | 0.428054 | 0.180901 | 0.693454 | OK | 18.3999 | 0.555749 | 0.211427 | 0.875913 | OK | 16.6724 | 0.489159 | 0.205376 | 0.762824 | OK | 27.1976  | 0.80577  | 0.385145 | 1.24431  | OK | 0.376641 | 0.192511 | 0.912575 | 1.298315        | 1.142751        | 1.882403        |
| RSc0844 |                     | hypothetical protein                                 | 10.141  | 0.561071 | 0.097136 | 1.01993  | OK | 7.35997 | 0.408538 | 0        | 0.777086 | OK | 12.2264 | 0.650883 | 0.191649 | 1.10198  | OK | 7.25269  | 0.393013 | 0.047912 | 0.718683 | OK | -0.45771 | 0.214215 | -0.51361 | -1.37336        | 1.160072        | -1.42761        |
| RSc0845 |                     | hypothetical protein                                 | 23.3243 | 1.3986   | 0.479707 | 2.33857  | OK | 25.7599 | 1.55013  | 0.601761 | 2.5274   | OK | 14.4494 | 0.831967 | 0.230311 | 1.38187  | OK | 20.8515  | 1.22386  | 0.528249 | 1.93691  | OK | 0.148406 | -0.74939 | -0.19254 | 1.108344        | -1.68108        | -1.14278        |
| RSc0852 |                     | putative bacteriophage-related protein               | 5.0705  | 0.870723 | 0        | 1.79891  | OK | 5.51998 | 0.957595 | 0        | 1.79891  | OK | 5.55747 | 0.873077 | 0        | 1.65632  | OK | 4.53293  | 0.751104 | 0        | 1.4197   | OK | 0.137202 | 0.003895 | -0.2132  | 1.09977         | 1.002704        | -1.15926        |
| RSc0853 |                     | bacteriophage-like protein                           | 68.9588 | 2.43877  | 1.09633  | 3.74876  | OK | 41.3998 | 1.46719  | 0.637911 | 2.30357  | OK | 61.1322 | 2.09891  | 1.09869  | 3.12439  | OK | 62.5544  | 2.17238  | 1.14602  | 3.19496  | OK | -0.7331  | -0.21651 | -0.16688 | -1.6622         | -1.16192        | -1.12263        |
| RSc0854 |                     | hypothetical conserved protein                       | 9.1269  | 1.68879  | 0.505106 | 2.77808  | OK | 11.96   | 2.23735  | 0.757659 | 3.53574  | OK | 8.89196 | 1.49686  | 0.498287 | 2.49144  | OK | 4.53293  | 0.808003 | 0.124572 | 1.37029  | OK | 0.405801 | -0.17405 | -1.06356 | 1.324824        | -1.12822        | <b>-2.09008</b> |
| RSc0856 |                     | hypothetical conserved protein                       | 3.0423  | 2.843    | 0        | 5.5118   | OK | 8.27997 | 8.02059  | 0.290095 | 14.2146  | OK | 5.55747 | 3.89107  | 0        | 7.72682  | OK | 0.906586 | 0.791356 | 0        | 1.43089  | OK | 1.496294 | 0.452753 | -1.84502 | <b>2.821171</b> | 1.368649        | <b>-3.59259</b> |
| RSc0857 |                     | bacteriophage-like protein                           | 58.8178 | 2.77502  | 1.27386  | 4.29338  | OK | 59.7998 | 2.82922  | 1.27741  | 4.39998  | OK | 68.9127 | 3.13979  | 1.68579  | 4.60175  | OK | 49.8622  | 2.30653  | 1.20271  | 3.37684  | OK | 0.027906 | 0.17817  | -0.26677 | 1.019531        | 1.131448        | -1.20311        |
| RSc0858 |                     | bacteriophage-like protein                           | 39.5499 | 2.33888  | 1.13255  | 3.50061  | OK | 40.4799 | 2.40225  | 1.18403  | 3.60357  | OK | 41.1253 | 2.33615  | 1.26962  | 3.40257  | OK | 43.5161  | 2.51924  | 1.37119  | 3.65649  | OK | 0.038568 | -0.00168 | 0.107171 | 1.027094        | -1.00117        | 1.077114        |
| RSc0859 |                     | bacteriophage-like protein                           | 23.3243 | 6.93341  | 2.21485  | 8.68902  | OK | 17.4799 | 5.28498  | 1.53336  | 7.15567  | OK | 28.8989 | 7.48139  | 2.85724  | 10.5886  | OK | 24.4778  | 6.92661  | 2.35302  | 8.7398   | OK | -0.39167 | 0.109741 | -0.00142 | -1.31191        | 1.079035        | -1.00098        |
| RSc0860 |                     | bacteriophage-like protein                           | 8.1128  | 0.619773 | 0.052242 | 1.02529  | OK | 9.19997 | 0.706006 | 0.256322 | 1.15345  | OK | 11.1149 | 0.809431 | 0.316078 | 1.26431  | OK | 10.879   | 0.811781 | 0.316078 | 1.26431  | OK | 0.187941 | 0.385168 | 0.389351 | 1.139136        | 1.306012        | 1.309804        |
| RSc0862 |                     | signal peptide protein                               | 5.0705  | 1.14507  | 0.288148 | 1.87296  | OK | 10.12   | 2.31588  | 0.720369 | 3.45777  | OK | 4.44598 | 0.898401 | 0.142129 | 1.56342  | OK | 3.62634  | 0.785163 | 0.142129 | 1.42129  | OK | 1.016125 | -0.35    | -0.54437 | <b>2.022479</b> | -1.27456        | -1.45839        |
| RSc0863 |                     | probable bacteriophage protein                       | 46.6486 | 4.9088   | 2.32975  | 7.32208  | OK | 51.5198 | 5.45524  | 2.57937  | 8.32054  | OK | 94.4771 | 9.35804  | 5.17118  | 13.4615  | OK | 68.9005  | 7.05554  | 3.89127  | 10.2402  | OK | 0.152272 | 0.930836 | 0.523386 | 1.111318        | 1.90638         | 1.437325        |
| RSc0866 |                     | hypothetical protein                                 | 1.0141  | 0.135214 | 0        | 0.666669 | OK | NA      | NA       | NA       | 0.199693 | OK | 2.22299 | 0.275623 | 0        | 1.11589  | OK | 0        | 0        | 0        | 0.196997 | OK | NA       | 1.027452 | NA       | NA              | <b>2.038421</b> | NA              |
| RSc0868 | <i>ripP1, popP2</i> | Type III effector protein (acetyltransferase) PopP2  | 943.113 | 46.5419  | 21.2475  | 71.7323  | OK | 719.437 | 35.6073  | 16.638   | 54.6113  | OK | 506.842 | 24.131   | 14.2914  | 33.9528  | OK | 783.29   | 37.8888  | 21.8701  | 53.7875  | OK | -0.38636 | -0.94764 | -0.29676 | -1.30709        | -1.92872        | -1.22838        |
| RSc0869 |                     | putative cytosine-specific methyltransferase protein | 24.3384 | 3.75868  | 0.55614  | 6.89613  | OK | 22.9999 | 3.58461  | 0.667368 | 6.45122  | OK | 37.7908 | 5.37835  | 1.53617  | 9.21702  | OK | 35.3568  | 5.2802   | 1.86535  | 8.66839  | OK | -0.06841 | 0.516938 | 0.490366 | -1.04856        | 1.430915        | 1.404802        |
| RSc0870 |                     | putative cytosine-specific methyltransferase protein | 98.3677 | 16.892   | 7.55582  | 26.2737  | OK | 73.5997 | 12.7679  | 5.20344  | 20.4704  | OK | 136.714 | 21.4777  | 11.7825  | 31.2628  | OK | 69.8071  | 11.567   | 5.63378  | 17.5641  | OK | -0.40382 | 0.346499 | -0.32301 | -1.32301        | 1.271472        | -1.46036        |
| RSc0873 |                     | putative bacteriophage-related transmembrane protein | 6.0846  | 0.099481 | 0.015704 | 0.188445 | OK | 5.51998 | 0.090336 | 0.015704 | 0.157037 | OK | 7.78046 | 0.12456  | 0.046475 | 0.216884 | OK | 5.43952  | 0.087546 | 0.015492 | 0.154917 | OK | -0.13911 | 0.324355 | -0.18437 | -1.10122        | 1.252105        | -1.13632        |
| RSc0874 |                     | hypothetical protein                                 | 60.846  | 16.7127  | 5.85464  | 20.6539  | OK | 58.8798 | 16.4308  | 5.69201  | 19.6781  | OK | 77.8046 | 18.766   | 8.1821   | 25.3485  | OK | 59.8347  | 15.6775  | 6.2569   | 18.6103  | OK | -0.02454 | 0.167176 | -0.09225 | -1.01716        | 1.122859        | -1.06603        |
| RSc0875 |                     | putative transmembrane protein                       | 8.1128  | 0.152368 | 0.053802 | 0.251076 | OK | 6.43998 | 0.121085 | 0.035868 | 0.215208 | OK | 7.78046 | 0.142929 | 0.053076 | 0.247687 | OK | 10.879   | 0.20107  | 0.070768 | 0.318454 | OK | -0.33154 | -0.09226 | 0.400138 | -1.25836        | -1.06604        | 1.319634        |
| RSc0876 |                     | hypothetical protein                                 | 6.0846  | 0.386442 | 0.109525 | 0.657153 | OK | 18.3999 | 1.173    | 0.492865 | 1.80717  | OK | 22.2299 | 1.35355  | 0.648282 | 2.05289  | OK | 13.5988  | 0.845012 | 0.378164 | 1.29656  | OK | 1.601879 | 1.808424 | 1.12872  | <b>3.035384</b> | <b>3.502595</b> | <b>2.186646</b> |
| RSc0878 |                     | hypothetical protein                                 | 5.0705  | 1.37528  | 0.271231 | 2.71231  | OK | 3.67999 | 1.01388  | 0        | 1.92858  | OK | 3.33448 | 0.795202 | 0        | 1.90783  | OK | 4.53293  | 1.1732   | 0.258817 | 2.32935  | OK | -0.43984 | -0.79033 | -0.22928 | -1.35645        | -1.72947        | -1.17225        |
| RSc0882 |                     | putative transmembrane protein                       | 6.0846  | 1.24361  | 0.270025 | 2.02519  | OK | 8.27997 | 1.71283  | 0.405038 | 2.97028  | OK | 8.89196 | 1.64029  | 0.53276  | 2.6638   | OK | 0.906586 | 0.178088 | 0        | 0.26638  | OK | 0.461848 | 0.399417 | -2.80377 | 1.377305        | 1.38975         | <b>-6.98312</b> |
| RSc0883 |                     | putative lysozyme (endolysin) protein                | 1.0141  | 0.217603 | 0        | 0.85831  | OK | 2.75999 | 0.599758 | 0        | 1.30383  | OK | 2.22299 | 0.428745 | 0        | 0.964344 | OK | 1.81317  | 0.373495 | 0        | 0.617969 | OK | 1.462682 | 0.978421 | 0.77939  | <b>2.756203</b> | 1.970308        | 1.716406        |
| RSc0884 |                     | hypothetical protein                                 | 124.734 | 39.2228  | 13.1969  | 45.2215  | OK | 138.919 | 44.4672  | 14.7806  | 53.3156  | OK | 92.2541 | 25.1103  | 10.5886  | 31.0715  | OK | 107.884  | 32.2466  | 12.498   | 36.4526  | OK | 0.181049 | -0.64341 | -0.28255 | 1.133708        | -1.56202        | -1.21634        |
| RSc0886 |                     | hypothetical protein                                 | 804.181 | 65.8902  | 29.5511  | 101.968  | OK | 890.557 | 73.3215  | 32.676   | 113.925  | OK | 504.619 | 39.137   | 22.3835  | 56.0928  | OK | 563.896  | 45.0964  | 25.0642  | 65.073   | OK | 0.154172 | -0.74491 | -0.54705 | 1.112783        | -1.67587        | -1.4611         |
| RSc0887 |                     | hemagglutinin-related protein                        | 824.463 | 5.13305  | 2.25581  | 8.01181  | OK | 828.917 | 5.16267  | 2.26807  | 8.06698  | OK | 731.364 | 4.47921  | 2.60028  | 6.34953  | OK | 1012.66  | 6.21456  | 3.55574  | 8.87725  | OK | 0.008301 | -0.19657 | 0.275836 | 1.00577         | -1.14597        | 1.210695        |
| RSc0888 |                     | activation/secretion protein                         | 112.565 | 4.49986  | 2.32468  | 6.64714  | OK | 172.959 | 6.93049  | 3.55967  | 10.2795  | OK | 96.7    | 3.74512  | 2.22164  | 5.30326  | OK | 103.351  | 4.05458  | 2.4008   | 5.73325  | OK | 0.623077 | -0.26487 | -0.15033 | 1.540157        | -1.20153        | -1.10982        |
| RSc0889 |                     | hypothetical protein                                 | 210.933 | 10.6794  | 5.43411  | 15.8982  | OK | 219.879 | 11.1657  | 5.70357  | 16.6167  | OK | 223.41  | 10.9064  | 6.55696  | 15.2405  | OK | 230.273  | 11.4257  | 6.82278  | 16.038   | OK | 0.064243 | 0.030344 | 0.097452 | 1.045536        | 1.021256        | 1.069882        |
| RSc0890 |                     | putative bacteriophage related protein               | 5.0705  | 0.971682 | 0        | 2.7157   | OK | 4.59998 | 0.891554 | 0        | 2.19843  | OK | 4.44598 | 0.77301  | 0        | 1.65846  | OK | 3.62634  | 0.668923 | 0        | 1.65846  | OK | -0.12416 | -0.33    | -0.53864 | -1.08987        | -1.25701        | -1.45261        |
| RSc0891 |                     | putative site-specific integrase/recombinase protein | 76.0575 | 4.01159  | 1.35042  | 6.65896  | OK | 55.1998 | 2.92055  | 1.07102  | 4.79631  | OK | 50.0173 | 2.54132  | 1.14844  | 3.95063  | OK | 47.1425  | 2.43615  | 1.05656  | 3.81281  | OK | -0.45793 | -0.6586  | -0.7     |                 |                 |                 |



|         |              |                                                                                           |         |         |         |         |    |         |         |         |         |         |         |         |          |         |         |         |         |          |         |          |          |          |          |          |          |          |
|---------|--------------|-------------------------------------------------------------------------------------------|---------|---------|---------|---------|----|---------|---------|---------|---------|---------|---------|---------|----------|---------|---------|---------|---------|----------|---------|----------|----------|----------|----------|----------|----------|----------|
| RSc1033 |              | hypothetical protein                                                                      | 896.464 | 45.2807 | 20.7499 | 69.8238 | OK | 1090.2  | 55.2306 | 24.7834 | 85.6887 | OK      | 690.238 | 33.6184 | 19.4972  | 47.704  | OK      | 780.57  | 38.6398 | 22.2383  | 54.9546 | OK       | 0.286572 | -0.42965 | -0.22881 | 1.219738 | -1.3469  | -1.17187 |
| RSc1034 |              | Dehydrogenase                                                                             | 1276.75 | 97.5368 | 42.8058 | 152.255 | OK | 1623.79 | 124.61  | 54.4685 | 194.485 | OK      | 1291.56 | 94.0559 | 51.7103  | 135.787 | OK      | 1226.61 | 91.5283 | 49.6242  | 132.879 | OK       | 0.353401 | -0.05243 | -0.09173 | 1.277569 | -1.03701 | -1.06565 |
| RSc1035 | <i>rmuC</i>  | Putative DNA recombination protein RmuC                                                   | 1221.99 | 64.9315 | 28.8772 | 100.96  | OK | 1949.47 | 103.912 | 46.3556 | 160.909 | OK      | 1611.67 | 82.8807 | 46.4696  | 118.417 | OK      | 1613.72 | 84.0062 | 47.0707  | 120.729 | OK       | 0.678372 | 0.345138 | 0.371577 | 1.600333 | 1.270273 | 1.293767 |
| RSc1036 |              | hypothetical conserved protein                                                            | 1203.74 | 529.978 | 137.852 | 575.821 | OK | 1137.12 | 512.341 | 130.065 | 544.462 | OK      | 1364.92 | 499.807 | 183.743  | 586.941 | OK      | 642.769 | 266.849 | 68.6536  | 270.321 | OK       | -0.04883 | -0.08456 | -0.98991 | -1.03442 | -1.06037 | -1.98606 |
| RSc1037 | <i>moeA1</i> | molybdopterin biosynthesis MOEA proteir                                                   | 1307.17 | 74.6303 | 33.0492 | 116.171 | OK | 1818.83 | 104.193 | 46.3288 | 162.151 | OK      | 961.443 | 52.775  | 29.9436  | 75.2529 | OK      | 1382.54 | 77.2915 | 42.9946  | 111.156 | OK       | 0.481425 | -0.49991 | 0.050548 | 1.396122 | -1.41412 | 1.035658 |
| RSc1038 | <i>mobA</i>  | molybdopterin-guanine dinucleotide biosynthesis protein A                                 | 515.163 | 73.2372 | 31.4151 | 114.979 | OK | 638.478 | 91.5353 | 38.0123 | 144.614 | OK      | 700.242 | 92.2205 | 47.7262  | 135.947 | OK      | 777.851 | 107.101 | 53.3046  | 150.926 | OK       | 0.321752 | 0.332511 | 0.548323 | 1.249847 | 1.259203 | 1.462385 |
| RSc1039 | <i>moaA</i>  | molybdenum cofactor biosynthesis protein A                                                | 1912.59 | 128.304 | 56.48   | 200.091 | OK | 2559.43 | 172.378 | 77.373  | 267.419 | OK      | 1969.57 | 126.47  | 70.2132  | 182.328 | OK      | 2931.9  | 192.343 | 105.207  | 278.135 | OK       | 0.42601  | -0.02077 | 0.584115 | 1.343512 | -1.0145  | 1.499119 |
| RSc1040 | <i>rne</i>   | ribonuclease E protein                                                                    | 13509.8 | 301.785 | 113.955 | 489.025 | OK | 21574.8 | 482.577 | 167.104 | 798.297 | OK      | 15632.1 | 341     | 177.012  | 505.061 | OK      | 15317.7 | 336.568 | 175.656  | 497.445 | OK       | 0.677238 | 0.176251 | 0.157377 | 1.599076 | 1.129944 | 1.115258 |
| RSc1041 | <i>rluC</i>  | ribosomal large subunit pseudouridine synthase C protein                                  | 2560.6  | 197.727 | 72.1601 | 323.298 | OK | 2613.71 | 202.751 | 72.4188 | 332.932 | OK      | 1631.67 | 120.063 | 57.1529  | 182.94  | OK      | 1752.43 | 132.161 | 63.9781  | 199.78  | OK       | 0.036199 | -0.71972 | -0.58121 | 1.025409 | -1.64686 | -1.49611 |
| RSc1042 |              | putative phosphoglycolate phosphatase protein                                             | 751.448 | 97.1756 | 7.12314 | 186.86  | OK | 872.157 | 113.652 | 10.7335 | 216.329 | OK      | 814.726 | 98.1428 | 30.1294  | 165.952 | OK      | 684.472 | 85.8696 | 23.1024  | 148.625 | OK       | 0.225957 | 0.014288 | -0.41527 | -0.5112  | 1.060171 | -1.33355 |
| RSc1043 |              | hypothetical protein                                                                      | 304.23  | 76.74   | 0       | 246.946 | OK | 314.639 | 80.5389 | 0       | 260.836 | OK      | 327.891 | 73.2461 | 0.223386 | 166.422 | OK      | 323.651 | 78.0502 | 0.723466 | 176.767 | OK       | 0.069707 | -0.06723 | 0.024424 | 1.049504 | -1.0477  | 1.017073 |
| RSc1044 |              | putative protease transmembrane protein                                                   | 1542.45 | 101.882 | 44.4633 | 159.275 | OK | 1514.31 | 100.414 | 43.9535 | 156.726 | OK      | 1997.36 | 126.339 | 70.2368  | 182.493 | OK      | 1919.24 | 123.989 | 68.0017  | 179.866 | OK       | -0.02094 | 0.310401 | 0.283313 | -1.01462 | 1.240052 | 1.216986 |
| RSc1045 |              | Methyltransferase                                                                         | 636.855 | 71.9538 | 31.7606 | 112.174 | OK | 670.678 | 76.2833 | 33.0803 | 118.86  | OK      | 509.065 | 53.9565 | 29.596   | 78.2862 | OK      | 459.639 | 50.4856 | 26.9055  | 73.5127 | OK       | 0.084296 | -0.41527 | -0.5112  | 1.060171 | -1.33355 | -1.42523 |
| RSc1046 | <i>maf</i>   | Maf-like protein                                                                          | 419.837 | 63.9178 | 27.1915 | 98.9684 | OK | 381.799 | 58.6531 | 24.8797 | 89.721  | OK      | 222.299 | 31.2177 | 16.3988  | 44.8522 | OK      | 226.646 | 33.3767 | 16.7246  | 47.7844 | OK       | -0.12401 | -1.03385 | -0.93738 | -1.08976 | -2.04749 | -1.91504 |
| RSc1047 |              | hypothetical protein                                                                      | 1595.18 | 271.757 | 102.565 | 432.798 | OK | 1645.87 | 283.236 | 105.904 | 446.275 | OK      | 967     | 150.797 | 74.7085  | 210.831 | OK      | 1097.88 | 180.505 | 84.3558  | 266.715 | OK       | 0.059687 | -0.84971 | -0.59028 | 1.04224  | -1.80214 | -1.50554 |
| RSc1048 | <i>rpmF</i>  | 50S ribosomal protein L32                                                                 | 3108.22 | 5650.9  | 611.809 | 2486.59 | OK | 3015.75 | 574.59  | 593.92  | 242.89  | OK      | 2722.05 | 3340.48 | 629.316  | 1999.13 | OK      | 1931.03 | 3275.3  | 445.074  | 1421.7  | OK       | 0.024225 | -0.75843 | -0.78685 | 1.016934 | -1.69164 | -1.72531 |
| RSc1049 | <i>plsX</i>  | putative glycerol-3-phosphate acyltransferase PlsX                                        | 2398.35 | 171.046 | 76.3741 | 265.586 | OK | 3195.15 | 228.835 | 102.014 | 354.719 | OK      | 1740.6  | 118.6   | 65.7985  | 171.386 | OK      | 2630.01 | 183.329 | 100.457  | 266.117 | OK       | 0.419923 | -0.52828 | 0.100051 | 1.337856 | -1.44221 | 1.071811 |
| RSc1050 | <i>fabH</i>  | 3-oxoacyl-(acyl carrier protein) synthase III                                             | 2452.09 | 192.816 | 85.671  | 299.619 | OK | 4312.02 | 340.647 | 149.284 | 530.635 | OK      | 2529.76 | 189.438 | 104.72   | 272.843 | OK      | 3691.62 | 283.454 | 152.191  | 411.887 | OK       | 0.821053 | -0.0255  | 0.55589  | 1.766695 | -1.01783 | 1.470075 |
| RSc1051 | <i>fabD</i>  | acyl-carrier-protein S-malonyltransferase                                                 | 3708.56 | 310.981 | 76.696  | 483.492 | OK | 6245.86 | 526.347 | 220.695 | 831.881 | OK      | 5161.78 | 411.255 | 221.199  | 600.886 | OK      | 5702.43 | 466.612 | 245.519  | 682.726 | OK       | 0.759188 | 0.403207 | 0.585397 | 1.692537 | 1.322444 | 1.500452 |
| RSc1052 | <i>fabG</i>  | 3-ketoacyl-(acyl-carrier-protein) reductase                                               | 4440.74 | 486.37  | 201.704 | 770.837 | OK | 7314.89 | 806.366 | 320.975 | 1291.97 | OK      | 7819.37 | 804.623 | 418.716  | 1186.52 | OK      | 8754.9  | 932.594 | 468.355  | 1386.85 | OK       | 0.729381 | 0.726259 | 0.939195 | 1.657927 | 1.654343 | 1.917458 |
| RSc1053 | <i>acpP</i>  | acyl carrier protein                                                                      | 3924.57 | 2984.61 | 575.315 | 2360.03 | OK | 4630.34 | 3637.35 | 671.649 | 2795.81 | OK      | 3481.2  | 2044.3  | 598.521  | 1935.33 | OK      | 4619.96 | 3286.18 | 790.174  | 2569.59 | OK       | 0.285345 | -0.54594 | 0.138669 | 1.218702 | -1.45997 | 1.101042 |
| RSc1054 | <i>fabF1</i> | 3-oxoacyl-(acyl carrier protein) synthase II                                              | 7284.28 | 438.013 | 186.883 | 689.085 | OK | 11968.2 | 722.226 | 288.943 | 1156.08 | OK      | 9290.98 | 536.413 | 292.41   | 779.95  | OK      | 9421.24 | 554.51  | 297.357  | 811.483 | OK       | 0.721477 | 0.292371 | 0.348024 | 1.648869 | 1.224651 | 1.265967 |
| RSc1055 | <i>rpoE1</i> | RNA polymerase sigma factor RpoE                                                          | 7707.16 | 1133.19 | 426.013 | 1827.59 | OK | 7600.09 | 1127.22 | 421.504 | 1831.56 | OK      | 5483    | 745.275 | 372.295  | 1110.32 | OK      | 6662.5  | 948.175 | 450.545  | 1384.57 | OK       | -0.00762 | -0.60455 | -0.25716 | -1.0053  | -1.5205  | -1.19513 |
| RSc1056 | <i>rseA</i>  | putative transmembrane sigma-e factor negative regulatory transcription regulator protein | 15006.7 | 1964.29 | 420.97  | 3507    | OK | 14522.1 | 1915.66 | 360.212 | 3453.82 | OK      | 12843.3 | 1564.92 | 606.95   | 2508.04 | OK      | 12941.5 | 1643.03 | 542.447  | 2728.26 | OK       | -0.03617 | -0.32792 | -0.25765 | -1.02539 | -1.2552  | -1.19553 |
| RSc1057 | <i>rseB</i>  | putative sigma-e factor regulatory (negative regulator) transcription regulator protein   | 12775.6 | 867.889 | 31.453  | 1816.67 | OK | 14847.8 | 1012.71 | 31.5113 | 2044.28 | OK      | 9305.43 | 604.857 | 124.086  | 1092.66 | OK      | 13323.2 | 885.017 | 206.455  | 1564.35 | OK       | 0.222639 | -0.52092 | 0.028195 | 1.166866 | -1.43487 | 1.019735 |
| RSc1058 |              | periplasmic protease signal peptide protein                                               | 14537.1 | 690.414 | 264.689 | 1116.62 | OK | 22028.4 | 1049.14 | 378.133 | 1717.83 | OK      | 15773.2 | 723.326 | 382.445  | 1064.22 | OK      | 19355.6 | 901.26  | 464.685  | 1337.01 | OK       | 0.603674 | 0.067184 | 0.384482 | 1.519581 | 1.04767  | 1.305391 |
| RSc1059 |              | Glutaredoxin                                                                              | 280.906 | 153.658 | 0       | 888.891 | OK | 399.279 | 224.332 | 0       | 1318.64 | OK      | 426.814 | 188.755 | 0        | 775.693 | OK      | 404.337 | 207.709 | 0        | 991.959 | OK       | 0.545913 | 0.296792 | 0.434841 | 1.459944 | 1.22841  | 1.351762 |
| RSc1060 | <i>lepA</i>  | GTP-binding protein LepA                                                                  | 8604.64 | 338.927 | 139.231 | 538.359 | OK | 14505.6 | 572.688 | 219.866 | 925.195 | OK      | 7414.78 | 283.028 | 156.054  | 409.862 | OK      | 9616.16 | 371.744 | 202.368  | 539.895 | OK       | 0.756775 | -0.26003 | 0.133335 | 1.689709 | -1.1975  | 1.096826 |
| RSc1061 | <i>lepB</i>  | signal peptidase I                                                                        | 3706.54 | 315.744 | 138.273 | 492.618 | OK | 7294.65 | 246.032 | 990.148 | OK      | 5664.18 | 458.178 | 246.029 | 670.473  | OK      | 6561.87 | 545.366 | 286.031 | 803.695  | OK      | 0.984034 | 0.537153 | 0.788469 | 1.977989 | 1.451106 | 1.727241 |          |
| RSc1062 |              | hypothetical protein                                                                      | 2759.87 | 717.719 | 231.876 | 948.481 | OK | 3961.51 | 1119.88 | 353.304 | 1455.17 | OK      | 4269.25 | 1041.58 | 446.499  | 1454.44 | OK      | 3688.9  | 978.628 | 387.009  | 1253.17 | OK       | 0.641853 | 0.537283 | 0.447341 | 1.560332 | 1.451236 | 1.363525 |
| RSc1063 | <i>rnc</i>   | ribonuclease III                                                                          | 2870.92 | 303.593 | 129.721 | 477.119 | OK | 4330.42 | 460.805 | 192.451 | 728.374 | OK      | 3216.67 | 320.111 | 170.654  | 467.299 | OK      | 3539.31 | 364.193 | 188.288  | 533.468 | OK       | 0.602018 | 0.076434 | 0.262565 | 1.517838 | 1.054408 | 1.199609 |
| RSc1064 | <i>era</i>   | GTP-binding protein Era                                                                   | 4716.58 | 413.265 | 177.767 | 647.097 | OK | 7180.57 | 632.427 | 260.26  | 1004.35 | OK      | 5916.49 | 491.735 | 263.476  | 720.308 | OK      | 6914.53 | 590.91  | 310.15   | 870.177 | OK       | 0.613832 | 0.250814 | 0.515871 | 1.530318 | 1.189878 | 1.429857 |
| RSc1065 | <i>recO</i>  | DNA repair protein RecO                                                                   | 999.903 | 98.0124 | 6.60523 | 189.429 | OK | 1757.19 | 173.245 | 19.1866 | 327.352 | OK      | 1087.04 | 100.614 | 24.9782  | 176.244 | OK      | 1220.26 | 116.507 | 26.84    | 205.256 | OK       | 0.821778 | 0.037795 | 0.24938  | 1.767582 | 1.026544 | 1.188697 |
| RSc1066 | <i>pdxJ</i>  | pyridoxal phosphate biosynthetic protein PdxJ                                             | 3316.11 | 338.982 | 107.13  | 572.244 | OK | 4654.26 | 478.657 | 123.411 | 834.362 | OK      | 3294.47 | 317.413 | 150.109  | 485.108 | OK      | 3925.52 | 390.646 | 184.799  | 596.092 | OK       | 0.497784 | -0.09485 | 0.204653 | 1.412043 | -1.06795 | 1.152409 |
| RSc1067 | <i>acpS</i>  | 4'-phosphopantetheinyl transferase                                                        | 505.022 | 127.388 | 5.71424 | 248.492 | OK | 712.997 | 182.508 | 7.41306 | 356.445 | OK      | 703.576 | 157.169 | 28.6425  | 285.816 | OK      | 824.087 | 198.733 | 34.432   | 361.993 | OK       | 0.51873  | 0.303087 | 0.641602 | 1.432694 | 1.233782 | 1.560061 |
| RSc1068 |              | beta-hexosaminidase                                                                       | 2905.4  | 209.999 | 74.3751 | 346.072 | OK | 4203.46 | 305.122 | 103.511 | 507.683 | OK      | 3294.47 | 227.404 | 112.029  | 342.851 | OK      | 3852.99 | 272.162 | 133.15   | 410.681 | OK       | 0.539004 | 0.114875 | 0.374083 | 1.452969 | 1.082881 | 1.296016 |
| RSc1069 | <i>efp</i>   | elongation factor P                                                                       | 4926.5  | 783.356 | 300.424 | 1261.44 | OK | 7832.85 | 1257.28 | 460.234 | 2046.97 | OK      | 7041.32 | 1029.8  | 505.788  | 1549.07 | OK      | 5721.46 | 879.247 | 410.21   | 1256.29 | OK       | 0.682566 | 0.394624 | 0.1666   | 1.604992 | 1.3146   | 1.122411 |
| RSc1070 |              | hypothetical protein                                                                      | 279.892 | 17.5172 | 8.75983 | 26.2254 | OK | 284.279 | 17.8577 | 8.97612 | 26.7121 | OK      | 186.731 | 11.2087 | 6.66788  | 15.7362 | OK      | 200.355 | 12.2698 | 7.25466  | 17.2832 | OK       | 0.027774 | -0.64415 | -0.51366 | 1.019438 | -1.56282 | -1.42767 |
| RSc1071 | <i>uvrC</i>  | excinuclease ABC subunit C                                                                |         |         |         |         |    |         |         |         |         |         |         |         |          |         |         |         |         |          |         |          |          |          |          |          |          |          |



|                 |                    |                                                               |         |         |         |         |    |         |         |         |         |    |         |         |         |         |    |         |         |         |         |    |          |          |          |          |          |          |
|-----------------|--------------------|---------------------------------------------------------------|---------|---------|---------|---------|----|---------|---------|---------|---------|----|---------|---------|---------|---------|----|---------|---------|---------|---------|----|----------|----------|----------|----------|----------|----------|
| <b>RSce1191</b> | <b><i>dnaX</i></b> | DNA polymerase III subunits gamma and tau                     | 8284.18 | 263.461 | 107.777 | 418.945 | OK | 8044.45 | 256.317 | 105.244 | 407.284 | OK | 5364.07 | 165.882 | 92.9879 | 238.44  | OK | 7707.79 | 240.821 | 133.309 | 348.393 | OK | -0.03966 | -0.66743 | -0.12963 | -1.02787 | -1.58824 | -1.09401 |
| <b>RSce1192</b> |                    | hypothetical protein                                          | 2441.95 | 840.503 | 247.241 | 1014.87 | OK | 2468.35 | 866.019 | 250.387 | 1025.42 | OK | 2947.68 | 869.318 | 349.606 | 1128.78 | OK | 2640.88 | 862.037 | 315.467 | 1004.09 | OK | 0.043146 | 0.048631 | 0.036497 | 1.030358 | 1.034283 | 1.02562  |
| <b>RSce1194</b> | <b><i>recR</i></b> | recombination protein RecR                                    | 1477.54 | 205.961 | 77.7819 | 334.127 | OK | 1667.95 | 234.43  | 88.9677 | 380.326 | OK | 1280.44 | 165.543 | 90.7588 | 239.955 | OK | 1526.69 | 206.186 | 113.986 | 298.605 | OK | 0.186786 | -0.31517 | 0.001575 | 1.138225 | -1.24415 | 1.001092 |
| <b>RSce1195</b> | <b><i>oprB</i></b> | Carbohydrate-selective porin OprB                             | 2109.33 | 101.073 | 45.3715 | 156.555 | OK | 2182.23 | 104.863 | 47.082  | 162.243 | OK | 1110.38 | 51.3647 | 29.2347 | 73.5296 | OK | 1917.43 | 90.0739 | 50.5384 | 128.962 | OK | 0.053108 | -0.97655 | -0.16622 | 1.037498 | -1.96775 | -1.12211 |
| <b>RSce1196</b> |                    | DNA-binding transcriptional regulatory transcription regulato | 2061.67 | 174.931 | 76.2882 | 271.869 | OK | 1812.39 | 154.553 | 66.9882 | 241.731 | OK | 1309.34 | 105.51  | 57.3923 | 153     | OK | 1465.95 | 121.361 | 64.6353 | 177.626 | OK | -0.17868 | -0.72941 | -0.52748 | -1.13185 | -1.65796 | -1.44141 |
|                 |                    |                                                               |         |         |         |         |    |         |         |         |         |    |         |         |         |         |    |         |         |         |         |    |          |          |          |          |          |          |

|         |             |                                                                                    |         |         |          |         |    |         |         |          |         |    |         |         |          |         |    |         |         |          |         |    |          |          |          |          |          |          |
|---------|-------------|------------------------------------------------------------------------------------|---------|---------|----------|---------|----|---------|---------|----------|---------|----|---------|---------|----------|---------|----|---------|---------|----------|---------|----|----------|----------|----------|----------|----------|----------|
| RSc1274 |             | cation-transporting ATPase lipoprotein transmembrane                               | 12890.2 | 346.759 | 129.911  | 563.433 | OK | 10491.6 | 282.683 | 110.585  | 454.914 | OK | 3364.49 | 88.2031 | 50.184   | 126.293 | OK | 10936.1 | 289.205 | 156.617  | 422.028 | OK | -0.29475 | -1.97503 | -0.26184 | -1.22667 | -3.93137 | -1.19901 |
| RSc1275 |             | Cytochrome oxidase maturation protein cbb3-type                                    | 448.232 | 867.416 | 95.328   | 351.113 | OK | 310.959 | 631.371 | 68.0395  | 246.325 | OK | 64.4667 | 83.3431 | 15.0753  | 44.508  | OK | 456.919 | 824.77  | 110.911  | 326.631 | OK | -0.45824 | -3.37959 | -0.07273 | -1.37386 | -10.4078 | -1.05171 |
| RSc1276 |             | cytochrome C oxidase subunit I                                                     | 24928.6 | 1238.75 | 446.876  | 2028.5  | OK | 48995.3 | 2441.82 | 851.171  | 4019.89 | OK | 49503.8 | 2372.9  | 990.797  | 3755.21 | OK | 68732.8 | 3347.64 | 1230.15  | 5457.97 | OK | 0.979072 | 0.937766 | 1.434259 | 1.971197 | 1.91556  | 2.702434 |
| RSc1277 |             | cytochrome C oxidase subunit II                                                    | 8465.71 | 1069.01 | 411.227  | 1723.78 | OK | 16389.7 | 2085.14 | 746.553  | 3420.73 | OK | 10968.2 | 1291.85 | 645.715  | 1936.3  | OK | 21209.6 | 2599.23 | 1198.59  | 3970.25 | OK | 0.963869 | 0.273163 | 1.281809 | 1.950534 | 1.208455 | 2.431437 |
| RSc1278 |             | putative signal peptide protein                                                    | 500.965 | 857.868 | 0        | 1707.51 | OK | 981.636 | 1760.13 | 0        | 3516.36 | OK | 736.921 | 860.217 | 6.59618  | 1711.19 | OK | 958.261 | 1531.14 | 0        | 3045.7  | OK | 1.036854 | 0.003945 | 0.835779 | 2.051749 | 1.002738 | 1.78482  |
| RSc1279 |             | cytochrome C oxidase subunit III                                                   | 12011   | 944.463 | 291.1    | 1599.95 | OK | 24407.5 | 1928.18 | 514.523  | 3340.41 | OK | 13253.5 | 992.469 | 480.679  | 1507.11 | OK | 34089.4 | 2617.5  | 1043.18  | 4188.76 | OK | 1.029674 | 0.071528 | 1.470623 | 2.041562 | 1.050829 | 2.771416 |
| RSc1280 |             | iron-sulfur 4Fe-4S ferredoxin transmembrane protein                                | 7760.91 | 392.931 | 164.595  | 619.534 | OK | 15868.1 | 805.799 | 306.601  | 1305.27 | OK | 4571.58 | 223.174 | 124.937  | 321.025 | OK | 18405.5 | 913.244 | 468.955  | 1350.73 | OK | 1.036144 | -0.81611 | 1.216724 | 2.050739 | -1.76065 | 2.324184 |
| RSc1281 |             | lipoprotein transmembrane                                                          | 1747.29 | 1466.73 | 190.694  | 1798.49 | OK | 1862.07 | 1617.3  | 197.385  | 1923.11 | OK | 723.583 | 462.344 | 113.312  | 526.68  | OK | 2154.05 | 1689.96 | 314.633  | 1632.57 | OK | 0.140984 | -1.66556 | 0.204386 | 1.102657 | -3.17238 | 1.152196 |
| RSc1282 |             | hypothetical protein                                                               | 2037.33 | 1335.44 | 224.831  | 2456.76 | OK | 2207.07 | 1490.55 | 271.491  | 2710.85 | OK | 623.549 | 322.34  | 116.312  | 528.317 | OK | 2318.14 | 1423.35 | 528.66   | 2320.95 | OK | 0.15853  | -2.05066 | 0.091975 | 1.116149 | -4.14295 | 1.065828 |
| RSc1283 | <i>fnr</i>  | putative fumarate and nitrate reduction regulatory transcription regulator protein | 7427.27 | 843.595 | 335.521  | 1350.92 | OK | 7302.93 | 835.065 | 331.369  | 1333.43 | OK | 6336.63 | 675.007 | 350.862  | 998.117 | OK | 7212.8  | 796.366 | 400.885  | 1188.36 | OK | -0.01466 | -0.32165 | -0.08312 | -1.01021 | -1.24976 | -1.05931 |
| RSc1284 |             | hypothetical protein                                                               | 1173.31 | 129.165 | 54.2279  | 203.635 | OK | 1140.8  | 126.406 | 52.9347  | 199.583 | OK | 286.766 | 29.6526 | 16.6696  | 42.2693 | OK | 882.108 | 94.4394 | 49.2434  | 138.715 | OK | -0.03115 | -2.12298 | -0.45175 | -1.02183 | -4.35594 | -1.3677  |
| RSc1285 | <i>scpB</i> | Putative chromosome segregation and condensation protein E                         | 2831.37 | 242.153 | 106.279  | 377.678 | OK | 2958.71 | 254.327 | 111.347  | 395.345 | OK | 1520.52 | 123.468 | 66.795   | 179.416 | OK | 1635.48 | 136.463 | 72.9745  | 199.274 | OK | 0.070766 | -0.97178 | -0.82741 | 1.050274 | -1.96126 | -1.7745  |
| RSc1286 |             | hypothetical protein                                                               | 8660.41 | 341.124 | 139.983  | 541.943 | OK | 11032.6 | 435.573 | 174.567  | 696.405 | OK | 6313.29 | 240.983 | 134.452  | 347.179 | OK | 7642.52 | 295.447 | 162.205  | 428.246 | OK | 0.352618 | -0.50136 | -0.2074  | 1.276876 | -1.41555 | -1.1546  |
| RSc1287 |             | hypothetical protein                                                               | 1411.63 | 277.95  | 0        | 572.365 | OK | 1586.99 | 316.133 | 0        | 736.726 | OK | 748.036 | 133.343 | 1.42914  | 265.3   | OK | 947.382 | 179.445 | 4.54725  | 354.296 | OK | 0.185706 | -1.05968 | -0.63128 | 1.137374 | -2.08447 | -1.54894 |
| RSc1288 | <i>nusA</i> | transcription elongation factor NusA                                               | 10683.5 | 523.613 | 149.974  | 897.297 | OK | 15635.3 | 768.527 | 204.477  | 1330.77 | OK | 8280.64 | 391.604 | 194.605  | 588.685 | OK | 9678.71 | 464.986 | 229.923  | 700.694 | OK | 0.553595 | -0.41911 | -0.17131 | 1.467739 | -1.3371  | 1.12608  |
| RSc1289 | <i>infB</i> | translation initiation factor IF-2                                                 | 28292.4 | 666.686 | 224.881  | 1108.65 | OK | 44888.5 | 1059.23 | 347.142  | 1770.9  | OK | 37805.3 | 869.471 | 380.795  | 1355.82 | OK | 44573.2 | 1032.97 | 431.422  | 1635.23 | OK | 0.667937 | 0.38313  | 0.631719 | 1.588799 | 1.304169 | 1.54941  |
| RSc1290 | <i>rbfA</i> | ribosome-binding factor A                                                          | 410.711 | 125.521 | 41.8953  | 163.253 | OK | 619.158 | 192.541 | 61.1117  | 237.522 | OK | 603.542 | 160.16  | 68.8259  | 207.673 | OK | 593.814 | 172.635 | 67.6304  | 203.404 | OK | 0.617237 | 0.351585 | 0.459796 | 1.533935 | 1.275962 | 1.375348 |
| RSc1291 | <i>truB</i> | tRNA pseudouridine synthase B                                                      | 762.603 | 62.7229 | 28.2819  | 97.1126 | OK | 1220.84 | 100.901 | 43.9562  | 157.425 | OK | 759.151 | 59.3672 | 32.9423  | 85.7845 | OK | 955.542 | 76.707  | 41.6821  | 111.6   | OK | 0.685876 | -0.07933 | 0.290366 | 1.608679 | -1.05652 | 1.22295  |
| RSc1292 | <i>emrB</i> | multidrug resistance B (translocase) transmembrane protein                         | 341.752 | 15.7771 | 8.02427  | 23.4937 | OK | 197.799 | 9.1564  | 4.67393  | 13.6495 | OK | 232.302 | 10.3612 | 6.28379  | 14.4038 | OK | 300.987 | 13.6254 | 8.20157  | 19.0146 | OK | -0.78498 | -0.60664 | -0.21153 | -1.72307 | -1.52271 | -1.15792 |
| RSc1293 | <i>emrA</i> | multidrug resistance A (translocase) transmembrane protein                         | 573.981 | 32.8575 | 15.7124  | 49.9395 | OK | 160.079 | 9.19478 | 4.65368  | 13.7109 | OK | 237.86  | 13.0904 | 7.84889  | 18.3141 | OK | 251.124 | 14.0763 | 8.34253  | 19.795  | OK | -1.83734 | -1.32771 | -1.22295 | -3.57349 | -2.51005 | -2.33424 |
| RSc1294 |             | putative outer membrane CHANNEL lipoprotein                                        | 265.694 | 13.0817 | 6.70296  | 19.4079 | OK | 109.48  | 5.40603 | 2.76004  | 8.01727 | OK | 92.2541 | 4.38241 | 2.54991  | 6.18028 | OK | 118.763 | 5.73162 | 3.37106  | 8.08191 | OK | -1.27491 | -1.57775 | -1.19054 | -2.41983 | -2.98505 | -2.28237 |
| RSc1295 |             | putative transcription regulator protein                                           | 40.564  | 9.25761 | 3.48113  | 12.329  | OK | 11.04   | 2.55351 | 0.725236 | 4.20637 | OK | 25.5644 | 5.21557 | 2.14634  | 7.58373 | OK | 18.1317 | 3.96635 | 1.43089  | 6.15283 | OK | -1.85816 | -0.82781 | -1.22283 | -3.62544 | -1.77499 | -2.33404 |
| RSc1296 | <i>typA</i> | GTP-binding elongation factor protein                                              | 4619.23 | 179.314 | 79.6082  | 279.036 | OK | 8404.17 | 326.99  | 134.708  | 518.886 | OK | 6548.93 | 246.424 | 136.971  | 355.686 | OK | 5732.34 | 218.413 | 121.237  | 315.983 | OK | 0.866758 | 0.458655 | 0.284571 | 1.823561 | 1.37426  | 1.218048 |
| RSc1297 |             | putative transmembrane protein                                                     | 4.0564  | 4.0938  | 0.298153 | 4.77044 | OK | 8.27997 | 8.67328 | 1.19261  | 5.96305 | OK | 3.33448 | 2.49247 | 0.294128 | 4.11779 | OK | 6.3461  | 5.98078 | 0.588256 | 5.58843 | OK | 1.083137 | -0.71586 | 0.546893 | 2.118638 | -1.64247 | 1.460936 |
| RSc1298 |             | enoyl-CoA hydratase                                                                | 678.433 | 45.0893 | 20.8406  | 69.298  | OK | 567.638 | 37.8741 | 17.9936  | 57.6819 | OK | 394.581 | 25.1084 | 14.7735  | 35.3328 | OK | 441.507 | 28.6978 | 16.5148  | 40.8377 | OK | -0.25157 | -0.84462 | -0.65184 | -1.1905  | -1.79579 | -1.57118 |
| RSc1299 |             | tRNA-dihydrouridine synthase A                                                     | 802.153 | 59.1742 | 26.8182  | 91.3436 | OK | 1023.96 | 75.8664 | 33.7872  | 117.851 | OK | 698.019 | 49.1424 | 27.6838  | 70.161  | OK | 766.972 | 55.2826 | 30.6302  | 79.7981 | OK | 0.358493 | -0.268   | -0.09814 | 1.282086 | -1.20414 | -1.07039 |
| RSc1301 |             | hypothetical protein                                                               | 657.137 | 185.193 | 61.5938  | 240.595 | OK | 448.958 | 128.59  | 42.643   | 159.516 | OK | 621.326 | 153.353 | 67.2783  | 204.441 | OK | 545.765 | 146.619 | 59.622   | 178.051 | OK | -0.52625 | -0.27217 | -0.33696 | -1.44018 | -1.20763 | -1.26309 |
| RSc1302 | <i>pepV</i> | hypothetical protein                                                               | 566.882 | 23.3127 | 11.3298  | 35.2566 | OK | 844.557 | 34.8163 | 16.1002  | 53.6302 | OK | 429.037 | 17.085  | 10.2577  | 23.8243 | OK | 503.155 | 20.3036 | 12.0592  | 28.5672 | OK | 0.578647 | -0.44839 | -0.19938 | 1.493448 | -1.36451 | -1.14821 |
| RSc1303 |             | hypothetical protein                                                               | 312.343 | 477.887 | 64.0602  | 231.707 | OK | 402.959 | 644.358 | 80.7568  | 314.509 | OK | 250.086 | 265.635 | 57.481   | 155.636 | OK | 313.679 | 447.895 | 71.9352  | 194.965 | OK | 0.431193 | -0.84722 | -0.09351 | 1.348348 | -1.79904 | -1.06696 |
| RSc1304 | <i>lexA</i> | LexA repressor                                                                     | 3080.84 | 405.739 | 165.8    | 644.109 | OK | 4258.66 | 565.245 | 227.728  | 902.01  | OK | 2351.92 | 288.234 | 150.095  | 422.861 | OK | 3127.72 | 399.484 | 198.5    | 592.083 | OK | 0.478324 | -0.49331 | -0.02241 | 1.393125 | -1.40767 | -1.01566 |
| RSc1305 | <i>fpr</i>  | ferredoxin--NADP reductase                                                         | 6700.16 | 701.614 | 281.889  | 1117.2  | OK | 8782.29 | 925.359 | 364.525  | 1484.54 | OK | 11774.1 | 1160.8  | 592.062  | 1726.88 | OK | 8226.36 | 838.34  | 424.28   | 1246.27 | OK | 0.399336 | 0.72637  | 0.256858 | 1.3189   | 1.654471 | 1.194874 |
| RSc1306 | <i>ansB</i> | L-asparaginase II precursor signal peptide protein                                 | 1206.78 | 82.5024 | 36.3422  | 128.627 | OK | 1589.75 | 109.125 | 47.8924  | 170.336 | OK | 782.492 | 51.1765 | 29.1186  | 73.0844 | OK | 902.96  | 60.3594 | 33.4922  | 86.8956 | OK | 0.403474 | -0.68895 | -0.45086 | 1.322689 | -1.61211 | -1.36685 |
| RSc1307 | <i>rpsF</i> | 30S ribosomal protein S6                                                           | 5384.87 | 1669.17 | 502.467  | 2312.68 | OK | 8135.53 | 2566.51 | 732.321  | 3569.8  | OK | 6106.55 | 1641.04 | 671.816  | 2230.32 | OK | 4034.31 | 1189.13 | 451.264  | 1459.16 | OK | 0.620677 | -0.02452 | -0.48922 | 1.537597 | -1.01714 | -1.40369 |
| RSc1308 |             | hypothetical protein                                                               | 2665.05 | 1030.25 | 286.949  | 1177.93 | OK | 4209.9  | 1661.95 | 450.019  | 1862.7  | OK | 4099.19 | 1339.32 | 515.83   | 1673.97 | OK | 2890.2  | 1056.6  | 365.258  | 1176.79 | OK | 0.689883 | 0.378506 | 0.036435 | 1.613152 | 1.299995 | 1.025576 |
| RSc1309 | <i>rpsR</i> | 30S ribosomal protein S18                                                          | 2491.64 | 1331.06 | 314.849  | 1290.79 | OK | 4437.14 | 2433.65 | 551.679  | 2509.1  | OK | 5045.07 | 2185.86 | 740.291  | 2423.76 | OK | 3365.25 | 1688.94 | 498.006  | 1604.23 | OK | 0.870546 | 0.715625 | 0.343542 | 1.828355 | 1.642195 | 1.268868 |
| RSc1310 | <i>rplI</i> | 50S ribosomal protein L9                                                           | 4703.4  | 1040.35 | 361.243  | 1505.25 | OK | 8194.41 | 1836.24 | 600.365  | 2928.61 | OK | 10250.2 | 2032.48 | 905.43   | 2869.44 | OK | 5910.03 | 1253.99 | 530.131  | 1758.69 | OK | 0.819686 | 0.966172 | 0.269457 | 1.765021 | 1.93565  | 1.205354 |
| RSc1311 | <i>dnaB</i> | replicative DNA helicase                                                           | 3143.71 | 160.68  | 72.6436  | 248.32  | OK | 3007.47 | 154.181 | 70.0621  | 238.311 | OK | 2370.82 | 116.815 | 66.0782  | 166.871 | OK | 3123.19 | 156.432 | 87.3448  | 224.907 | OK | -0.05957 | -0.45996 | -0.03865 | -1.04215 | -1.37551 | -1.02716 |
| RSc1312 |             | hypothetical protein                                                               | 1457.26 | 201.823 | 80.2188  | 323.34  | OK | 1687.27 | 235.603 | 93.2633  | 375.416 | OK | 1034.8  | 132.974 | 68.2939  | 195.154 | OK | 1040.76 | 139.669 | 68.6992  | 196.37  | OK | 0.223267 | -0.60195 | -0.53108 | 1.167374 | -1.51776 | -1.44501 |
| RSc1313 | <i>pit</i>  | inorganic phosphate transporter                                                    | 1649.94 | 125.156 | 54.9733  | 195.369 | OK | 2064.47 | 157.    |          |         |    |         |         |          |         |    |         |         |          |         |    |          |          |          |          |          |          |

|                |                            |                                 |         |         |         |         |    |         |         |         |         |    |         |         |         |         |    |         |         |         |         |    |          |          |          |                 |                 |                 |
|----------------|----------------------------|---------------------------------|---------|---------|---------|---------|----|---------|---------|---------|---------|----|---------|---------|---------|---------|----|---------|---------|---------|---------|----|----------|----------|----------|-----------------|-----------------|-----------------|
| <b>RSc1356</b> | <b><i>ripG6, gala6</i></b> | Type III effector protein GALA6 | 848.802 | 32.1361 | 14.6916 | 49.6057 | OK | 890.557 | 33.7924 | 15.3138 | 52.2675 | OK | 985.896 | 36.1971 | 20.9044 | 51.4596 | OK | 1006.31 | 37.4002 | 21.4159 | 53.3693 | OK | 0.072504 | 0.171679 | 0.218851 | 1.05154         | 1.126369        | 1.163806        |
| <b>RSc1357</b> | <b><i>ripG7, gala7</i></b> | Type III effector protein GALA7 | 2379.08 | 85.979  | 38.4948 | 133.506 | OK | 3786.71 | 137.142 | 61.1213 | 212.98  | OK | 5398.53 | 189.343 | 106.18  | 271.872 | OK | 3618.18 | 128.389 | 72.6822 | 183.863 | OK | 0.673614 | 1.138946 | 0.578465 | 1.595064        | <b>2.202201</b> | 1.49326         |
| <b>RSc1358</b> | <b><i>aceA</i></b>         | isocitrate lyase                | 138868  | 7643.74 | 2768.03 | 12513   | OK | 28907.2 | 1596.33 | 571.293 | 2621.29 | OK | 25242   | 1337.05 | 654.728 | 209.89  | OK | 43281.3 | 2333.42 | 1024.71 | 3640.38 | OK | -2.25952 | -2.51523 | -1.71183 | <b>-4.78832</b> | <b>-5.71687</b> | <b>-3.27577</b> |
| <b>RSc1359</b> |                            | hypothetical protein            | 2003.86 | 374.004 | 138.075 | 575.036 | OK | 992.676 | 187.331 | 69.609  | 285.041 | OK | 1169.29 | 198.414 | 95.2347 | 209.112 | OK | 1523.97 | 273.956 | 123.93  | 397.981 | OK | -0.99746 | -0.91454 | -0.44911 | -1.99649        | -1.88497        | -1.3652         |
| <b>RSc1360</b> |                            | transcription regulator protein | 474.599 | 39.7974 | 18.6278 | 60.9386 | OK | 459.078 | 38.6872 | 18.2816 | 58.7919 | OK | 276.762 | 22.0505 | 12.8429 | 31.2193 | OK | 516.754 | 42.2844 | 23.4999 | 59.9793 | OK | -0.04082 | -0.85186 | 0.087451 | -1.0287         | -1.80483        | 1.062492        |
|                |                            |                                 |         |         |         |         |    |         |         |         |         |    |         |         |         |         |    |         |         |         |         |    |          |          |          |                 |                 |                 |



|         |            |                            |         |         |         |         |    |         |         |         |         |    |         |         |         |         |    |         |         |         |         |    |          |          |          |          |          |          |
|---------|------------|----------------------------|---------|---------|---------|---------|----|---------|---------|---------|---------|----|---------|---------|---------|---------|----|---------|---------|---------|---------|----|----------|----------|----------|----------|----------|----------|
| RSc1536 | <i>ppk</i> | polyphosphate kinase       | 7657.47 | 240.325 | 99.2194 | 381.374 | OK | 8696.73 | 273.448 | 111.349 | 435.536 | OK | 9597.76 | 292.957 | 160.407 | 425.581 | OK | 9739.45 | 300.31  | 164.195 | 436.055 | OK | 0.18628  | 0.285702 | 0.321466 | 1.137826 | 1.219003 | 1.2496   |
| RSc1537 | <i>ppx</i> | exopolyphosphatase protein | 4338.32 | 196.477 | 87.4536 | 305.579 | OK | 5323.1  | 241.722 | 105.79  | 377.461 | OK | 3420.07 | 149.705 | 84.7088 | 214.66  | OK | 4230.13 | 187.88  | 104.763 | 270.13  | OK | 0.298988 | -0.39224 | -0.06455 | 1.230281 | -1.31243 | -1.04576 |
| RSc1538 |            | hypothetical protein       | 264.68  | 25.2526 | 12.08   | 38.2405 | OK | 370.759 | 35.5735 | 16.8504 | 54.1676 | OK | 200.069 | 18.0446 | 10.3229 | 25.6555 | OK | 220.3   | 20.4796 | 11.3856 | 29.3748 | OK | 0.494371 | -0.48486 | -0.30224 | 1.408706 | -1.39945 | -1.23306 |
| RSc1539 |            | hydrolase protein          | 275.835 | 56.9176 | 22.4181 | 84.3734 | OK | 169.279 | 35.3577 | 13.8584 | 49.048  | OK | 283.431 | 52.7436 | 26.0024 | 73.9862 | OK | 187.663 | 37.2093 | 17.2902 | 48.6539 | OK | -0.68685 | -0.10988 | -0.61321 | -1.60977 | -1.07914 | -1.52966 |
| RSc1540 |            | putative acyltransferase   | 710.884 | 43.4771 | 20.1419 | 66.7862 | OK | 734.157 | 45.063  | 20.6719 | 69.4365 | OK | 500.173 | 29.3576 | 17.0986 | 41.5701 | OK | 744.307 | 44.5509 | 25.0989 | 63.793  | OK | 0.051688 | -0.56652 | 0.035199 | 1.036477 | -1.48095 | 1.024698 |
| RSc1541 |            | hypothetical protein       | 520.233 | 50.7625 | 23.3473 | 77.8766 | OK | 430.558 | 42.255  |         |         |    |         |         |         |         |    |         |         |         |         |    |          |          |          |          |          |          |

|         |             |                                                          |         |         |         |         |    |         |         |         |         |    |         |         |         |         |    |         |         |         |         |    |          |          |          |          |          |          |
|---------|-------------|----------------------------------------------------------|---------|---------|---------|---------|----|---------|---------|---------|---------|----|---------|---------|---------|---------|----|---------|---------|---------|---------|----|----------|----------|----------|----------|----------|----------|
| RSc1623 | <i>tex</i>  | putative transcription accessory protein                 | 3367.83 | 99.5825 | 44.3651 | 154.865 | OK | 5297.34 | 156.909 | 67.8137 | 246.237 | OK | 4584.92 | 131.959 | 74.5546 | 189.4   | OK | 3717.91 | 108.033 | 61.0881 | 155.055 | OK | 0.655964 | 0.406126 | 0.117508 | 1.575668 | 1.325122 | 1.084859 |
| RSc1624 |             | hypothetical protein                                     | 2256.37 | 242.185 | 102.433 | 381.927 | OK | 2619.23 | 282.923 | 119.674 | 443.031 | OK | 2373.04 | 239.533 | 128.314 | 350.758 | OK | 1750.62 | 182.802 | 95.214  | 268.3   | OK | -0.2243  | -0.01589 | -0.40583 | 1.16821  | -1.01107 | -1.32485 |
| RSc1625 |             | hypothetical protein                                     | 601.361 | 718.749 | 108.913 | 418.922 | OK | 424.118 | 527.623 | 78.9228 | 286.963 | OK | 875.858 | 755.581 | 179.072 | 560.884 | OK | 655.462 | 731.301 | 134.849 | 414.201 | OK | -0.44596 | 0.027098 | 0.024977 | -1.36222 | 1.051245 | 1.017464 |
| RSc1626 |             | ATP-dependent DNA helicase-related protein               | 3258.3  | 105.978 | 46.8425 | 165.031 | OK | 4949.58 | 161.298 | 69.9632 | 252.703 | OK | 2596.45 | 82.0924 | 46.9517 | 117.186 | OK | 3391.54 | 108.363 | 61.5147 | 155.299 | OK | 0.605964 | -0.36844 | 0.032107 | 1.521995 | -1.29096 | 1.022505 |
| RSc1627 |             | hypothetical protein                                     | 4635.45 | 421.646 | 180.545 | 660.443 | OK | 4596.3  | 420.339 | 178.99  | 661.035 | OK | 3667.93 | 316.014 | 170.294 | 461.517 | OK | 3795.88 | 336.618 | 178.035 | 494.889 | OK | -0.00448 | -0.41604 | -0.32492 | -1.00311 | -1.33426 | -1.25259 |
| RSc1628 | <i>rluD</i> | ribosomal large subunit pseudouridine synthase D protein | 1569.83 | 110.489 |         |         |    |         |         |         |         |    |         |         |         |         |    |         |         |         |         |    |          |          |          |          |          |          |

|                |             |                                                                                                                |         |         |          |         |    |         |         |          |         |    |         |         |         |         |    |         |         |          |         |    |          |          |          |           |          |          |
|----------------|-------------|----------------------------------------------------------------------------------------------------------------|---------|---------|----------|---------|----|---------|---------|----------|---------|----|---------|---------|---------|---------|----|---------|---------|----------|---------|----|----------|----------|----------|-----------|----------|----------|
| <b>RSc1757</b> |             | lysine-specific permease transmembrane protein                                                                 | 928.916 | 43.7301 | 20.12    | 67.3474 | OK | 908.037 | 42.8662 | 19.657   | 66.0426 | OK | 810.28  | 36.8386 | 21.3433 | 52.3617 | OK | 811.394 | 37.4518 | 21.5094  | 53.0676 | OK | -0.02879 | -0.24741 | -0.22359 | -1.02015  | -1.18707 | -1.16764 |
| <b>RSc1758</b> | <i>lysP</i> | lysine-specific permease transmembrane protein                                                                 | 569.924 | 26.6547 | 12.8886  | 40.3814 | OK | 606.278 | 28.4333 | 13.5999  | 43.2269 | OK | 436.817 | 19.7324 | 11.8477 | 27.6583 | OK | 412.497 | 18.916  | 11.1459  | 26.6263 | OK | 0.093192 | -0.43382 | -0.49478 | 1.066727  | -1.35081 | -1.40911 |
| <b>RSc1759</b> |             | trifunctional enoyl-CoA hydratase/delta3-cis- delta2-trans-enoyl-CoA isomerase/3-hydroxyacyl-CoA dehydrogenase | 19950.4 | 655.856 | 237.048  | 1074.47 | OK | 11577.2 | 381.333 | 150.876  | 612.553 | OK | 17287.1 | 552.341 | 284.08  | 820.369 | OK | 26495   | 855.573 | 413.09   | 1297.95 | OK | -0.78233 | -0.24782 | 0.383512 | -1.7199   | -1.18741 | 1.304513 |
| <b>RSc1760</b> | <i>pncA</i> | bifunctional pyrazinamidase/nicotinamidase hydrolase                                                           | 1666.17 | 227.816 | 91.1584  | 362.599 | OK | 870.317 | 119.966 | 49.2418  | 189.439 | OK | 1050.36 | 133.355 | 68.6503 | 196.215 | OK | 1308.2  | 173.362 | 85.1103  | 252.922 | OK | -0.92524 | -0.7726  | -0.39408 | -1.899    | -1.70834 | -1.31411 |
| <b>RSc1761</b> |             | acetyl-CoA acetyltransferase                                                                                   | 8827.74 | 559.009 | 231.385  | 883.97  | OK | 4463.82 | 283.727 | 125.798  | 441.248 | OK | 6062.09 | 368.055 | 202.126 | 534.549 | OK | 6135.77 | 380.154 | 205.845  | 554.379 | OK | -0.97837 | -0.60295 | -0.55629 | -1.97024  | -1.51882 | -1.47048 |
| <b>RSc1762</b> |             | acyl-CoA dehydrogenase oxidoreductase protein                                                                  | 4730.78 | 177.544 | 78.598   | 276.773 | OK | 2246.63 | 84.5021 | 37.7216  | 131.168 | OK | 3017.71 | 109.843 | 62.3137 | 157.374 | OK | 2813.14 | 103.643 | 58.9308  | 148.41  | OK | -1.07112 | -0.69273 | -0.77655 | -2.10106  | -1.61634 | -1.71303 |
| <b>RSc1763</b> |             | gluconate 5-dehydrogenase                                                                                      | 3263.37 | 338.426 | 143.031  | 532.48  | OK | 976.116 | 101.85  | 43.8387  | 158.987 | OK | 2317.47 | 226.371 | 121.221 | 329.017 | OK | 1792.32 | 180.912 | 94.6889  | 266.054 | OK | -1.73239 | -0.58015 | -0.90355 | -3.32279  | -1.49501 | -1.87067 |
| <b>RSc1764</b> |             | hypothetical protein                                                                                           | 1056.69 | 249.073 | 86.016   | 354.427 | OK | 552.918 | 132.138 | 47.0793  | 180.323 | OK | 633.552 | 133.102 | 61.633  | 185.921 | OK | 618.292 | 139.575 | 60.0264  | 182.562 | OK | -0.91452 | -0.90404 | -0.83553 | -1.88495  | -1.87129 | -1.78451 |
| <b>RSc1765</b> |             | 6-aminohexanoate-dimer hydrolase lipoprotein                                                                   | 1448.13 | 80.6328 | 35.4376  | 124.518 | OK | 1084.68 | 60.3644 | 27.0163  | 93.7051 | OK | 723.583 | 36.6175 | 22.2817 | 54.8878 | OK | 921.998 | 50.09   | 28.1882  | 71.7432 | OK | -0.4122  | -1.05665 | -0.84263 | -1.354308 | -2.08009 | -1.60367 |
| <b>RSc1766</b> |             | NADP-dependent oxidoreductase oxidoreductase protein                                                           | 7553.02 | 572.931 | 239.768  | 905.245 | OK | 4236.58 | 322.808 | 141.924  | 501.003 | OK | 6893.49 | 498.58  | 270.088 | 726.057 | OK | 4018.9  | 297.787 | 160.683  | 434.918 | OK | -0.82769 | -0.20054 | -0.94408 | -1.77484  | -1.14913 | -1.92396 |
| <b>RSc1767</b> |             | hypothetical protein                                                                                           | 2939.88 | 275.589 | 119.851  | 431.312 | OK | 1733.27 | 163.383 | 69.635   | 257.073 | OK | 2104.06 | 186.591 | 100.947 | 271.338 | OK | 1793.23 | 163.825 | 86.4299  | 240.806 | OK | -0.75426 | -0.56264 | -0.75036 | -1.68677  | -1.47697 | -1.68222 |
| <b>RSc1768</b> |             | putative glutathione S-transferase-related protein                                                             | 2335.47 | 189.189 | 83.2435  | 292.934 | OK | 1199.68 | 97.6484 | 42.6648  | 152.624 | OK | 1022.58 | 78.8035 | 43.4166 | 113.919 | OK | 976.393 | 77.2102 | 42.0889  | 111.927 | OK | -0.95416 | -1.2635  | -1.29296 | -1.93745  | -2.40077 | -2.45031 |
| <b>RSc1769</b> |             | hypothetical protein                                                                                           | 3369.85 | 292.875 | 128.303  | 457.44  | OK | 1639.43 | 143.217 | 61.6195  | 224.869 | OK | 2207.43 | 182.036 | 99.2725 | 263.062 | OK | 1576.55 | 133.652 | 71.1301  | 194.746 | OK | -1.03208 | -0.68606 | -1.1318  | -2.04497  | -1.60889 | -2.19133 |
| <b>RSc1770</b> |             | hydrolase protein                                                                                              | 3772.45 | 313.886 | 136.921  | 489.681 | OK | 1288    | 107.696 | 46.5118  | 168.502 | OK | 1693.92 | 133.952 | 73.0342 | 193.649 | OK | 1205.76 | 97.9069 | 52.4679  | 142.742 | OK | -1.54328 | -1.22852 | -1.68076 | -2.91456  | -2.34327 | -3.20596 |
| <b>RSc1771</b> | <i>gbdI</i> | NAD-dependent 4-hydroxybutyrate dehydrogenase oxidoreductase protein                                           | 1861.89 | 121.486 | 53.5834  | 189.392 | OK | 637.558 | 41.7605 | 19.5053  | 63.9526 | OK | 673.566 | 42.1021 | 24.1077 | 59.9928 | OK | 685.379 | 43.7438 | 24.6054  | 62.0387 | OK | -1.54058 | -1.52883 | -1.47364 | -2.90911  | -2.88551 | -2.77722 |
| <b>RSc1772</b> |             | esterase/lipase protein                                                                                        | 1384.25 | 102.115 | 44.8007  | 159.291 | OK | 2251.23 | 166.797 | 73.61    | 259.968 | OK | 932.544 | 65.6536 | 36.6458 | 94.4687 | OK | 2182.15 | 157.288 | 85.8137  | 228.652 | OK | 0.707899 | -0.63725 | 0.623214 | 1.633423  | -1.55536 | 1.540303 |
| <b>RSc1773</b> |             | putative thioesterase protein                                                                                  | 342.766 | 76.6037 | 20.7514  | 131.235 | OK | 458.158 | 103.745 | 27.0484  | 178.461 | OK | 181.174 | 36.2638 | 15.8123 | 56.049  | OK | 640.956 | 137.374 | 53.5077  | 198.783 | OK | 0.437556 | -1.07888 | 0.842623 | 1.354308  | -2.1124  | 1.793308 |
| <b>RSc1774</b> |             | hypothetical protein                                                                                           | 322.484 | 72.8265 | 13.324   | 132.788 | OK | 461.838 | 105.688 | 19.9093  | 191.77  | OK | 136.714 | 27.6258 | 10.9118 | 44.2534 | OK | 417.936 | 90.49   | 28.3636  | 152.428 | OK | 0.537276 | -1.39845 | 0.313295 | 1.45123   | -2.63618 | 1.242542 |
| <b>RSc1775</b> |             | hemagglutinin-related protein                                                                                  | 530.374 | 3.65859 | 1.68834  | 5.6278  | OK | 850.077 | 5.86633 | 2.57658  | 9.16721 | OK | 925.875 | 6.28081 | 3.61872 | 8.94312 | OK | 1101.5  | 7.48898 | 4.30099  | 10.6822 | OK | 0.68117  | 0.779663 | 1.033481 | 1.60344   | 1.71673  | 2.046958 |
| <b>RSc1779</b> |             | activation/secretion signal peptide protein                                                                    | 127.777 | 5.36785 | 2.77361  | 7.94089 | OK | 333.039 | 14.0256 | 7.18099  | 20.7831 | OK | 157.832 | 6.41789 | 3.8981  | 8.92066 | OK | 184.037 | 7.58534 | 4.61026  | 10.4949 | OK | 1.385646 | 0.257755 | 0.498869 | 2.61289   | 1.195616 | 1.413106 |
| <b>RSc1780</b> |             | putative signal peptide protein                                                                                | 1842.62 | 180.617 | 77.061   | 283.553 | OK | 1670.71 | 164.719 | 69.6694  | 259.098 | OK | 2054.04 | 190.117 | 102.24  | 277.476 | OK | 2104.19 | 200.901 | 106.041  | 295.317 | OK | -0.13293 | 0.073954 | 0.153551 | -1.09652  | 1.052597 | 1.112304 |
| <b>RSc1781</b> |             | hypothetical protein                                                                                           | 254.539 | 124.264 | 33.8603  | 125.925 | OK | 258.519 | 129.378 | 34.3029  | 123.491 | OK | 367.905 | 147.412 | 54.7987 | 158.065 | OK | 119.669 | 54.974  | 17.4657  | 51.3056 | OK | 0.058184 | 0.246446 | -1.17659 | 1.041154  | 1.186281 | -2.26041 |
| <b>RSc1782</b> |             | hypothetical protein                                                                                           | 3981.36 | 291.679 | 92.8587  | 490.029 | OK | 3640.43 | 267.876 | 73.6807  | 461.386 | OK | 3685.72 | 257.77  | 118.397 | 395.593 | OK | 1638.2  | 117.282 | 47.3588  | 187.177 | OK | -0.12291 | -0.17839 | -1.31449 | -1.08893  | -1.13162 | -2.48714 |
| <b>RSc1783</b> |             | hypothetical protein                                                                                           | 1329.49 | 88.0861 | 0.454328 | 183.378 | OK | 1520.75 | 101.154 | 1.81731  | 201.097 | OK | 1047.03 | 66.4262 | 6.61087 | 126.559 | OK | 1126.89 | 73.0231 | 21.4573  | 124.542 | OK | 0.199567 | -0.40716 | -0.27056 | 1.148354  | -1.32607 | -1.20628 |
| <b>RSc1784</b> | <i>tdk</i>  | thymidylate kinase                                                                                             | 897.479 | 126.749 | 0        | 341.348 | OK | 1406.67 | 200.33  | 1.9938   | 488.053 | OK | 1398.26 | 183.01  | 11.256  | 365.036 | OK | 968.234 | 132.454 | 15.5951  | 252.531 | OK | 0.660404 | 0.529948 | 0.063517 | 1.580525  | 1.443877 | 1.04501  |
| <b>RSc1785</b> | <i>holB</i> | DNA polymerase III subunit delta                                                                               | 1889.27 | 143.31  | 63.0633  | 223.524 | OK | 2806.91 | 213.873 | 94.8497  | 332.834 | OK | 1919.55 | 138.834 | 76.4139 | 200.838 | OK | 1985.42 | 147.413 | 79.5559  | 214.537 | OK | 0.577615 | -0.04578 | 0.037785 | 1.49238   | -1.03224 | 1.026537 |
| <b>RSc1786</b> | <i>pilZ</i> | putative type 4 fimbrial biogenesis protein                                                                    | 2039.36 | 574.727 | 182.965  | 760.427 | OK | 2514.35 | 720.158 | 227.715  | 931.668 | OK | 2490.86 | 614.783 | 265.204 | 844.97  | OK | 2154.05 | 578.683 | 229.854  | 729.636 | OK | 0.325437 | 0.0972   | 0.009896 | 1.253044  | 1.069696 | 1.006883 |
| <b>RSc1787</b> |             | hypothetical protein                                                                                           | 1962.28 | 196.841 | 51.2645  | 342.27  | OK | 2934.79 | 296.146 | 79.2997  | 512.885 | OK | 2194.09 | 207.616 | 86.3682 | 328.484 | OK | 2484.95 | 242.727 | 103.99   | 381.19  | OK | 0.589278 | 0.076887 | 0.302304 | 1.504493  | 1.05474  | 1.233112 |
| <b>RSc1788</b> |             | aankyrin repeat-containing protein                                                                             | 2204.65 | 198.853 | 33.3728  | 364.034 | OK | 2858.43 | 259.199 | 25.5715  | 494.019 | OK | 2544.21 | 217.43  | 85.0332 | 349.79  | OK | 2412.43 | 212.157 | 76.5107  | 348.695 | OK | 0.382358 | 0.128849 | 0.09343  | 1.30347   | 1.093421 | 1.066904 |
| <b>RSc1789</b> |             | hypothetical protein                                                                                           | 2242.18 | 126.332 | 56.357   | 196.312 | OK | 1183.12 | 66.8831 | 29.659   | 104.127 | OK | 1534.97 | 83.179  | 46.5412 | 118.884 | OK | 1274.66 | 70.3319 | 39.2874  | 101.358 | OK | -0.91751 | -0.60293 | -0.84497 | -1.88885  | -1.5188  | -1.79623 |
| <b>RSc1790</b> |             | transcription regulator protein                                                                                | 119.664 | 8.36745 | 0.416258 | 16.2935 | OK | 99.3596 | 6.97645 | 0.178396 | 13.796  | OK | 94.4771 | 6.31551 | 1.11459 | 11.4979 | OK | 153.213 | 10.4731 | 1.23191  | 19.7106 | OK | -0.26229 | -0.40589 | 0.323829 | -1.19939  | -1.3249  | 1.251648 |
| <b>RSc1791</b> |             | solute-binding periplasmic (PBP) ABC transporter protein                                                       | 464.458 | 34.3809 | 12.7321  | 56.1839 | OK | 462.758 | 34.4052 | 12.7135  | 56.1328 | OK | 445.709 | 31.4838 | 17.0943 | 46.0557 | OK | 844.031 | 61.0448 | 31.4615  | 90.6959 | OK | 0.001019 | -0.127   | 0.828261 | 1.000707  | -1.09202 | 1.775544 |
| <b>RSc1792</b> |             | transport system permease transmembrane ABC transporter                                                        | 189.637 | 17.7768 | 0        | 43.465  | OK | 151.799 | 14.309  | 0        | 35.578  | OK | 107.815 | 9.56118 | 0       | 22.3745 | OK | 179.504 | 16.3991 | 0.897973 | 31.878  | OK | -0.31307 | -0.89474 | -0.11638 | -1.24235  | -1.85927 | -1.08401 |
| <b>RSc1793</b> |             | ABC transporter permease                                                                                       | 113.579 | 11.5009 | 0        | 32.9268 | OK | 103.04  | 10.4963 | 0        | 29.5373 | OK | 85.5851 | 8.17152 | 0       | 20.3811 | OK | 106.071 | 10.4573 | 0        | 23.3268 | OK | -0.13187 | -0.49307 | -0.13724 | -1.09571  | -1.40744 | -1.0998  |
| <b>RSc1794</b> |             | ABC transporter ATP-binding protein                                                                            | 584.122 | 40.978  | 4.83007  | 76.983  | OK | 438.838 | 30.9137 | 2.80264  | 58.8553 | OK | 515.734 | 34.5844 | 11.5886 | 57.5314 | OK | 514.941 | 35.3136 | 11.7651  | 58.8256 | OK | -0.4066  | -0.24473 | -0.21463 | -1.32556  | -1.18487 | -1.1604  |
| <b>RSc1795</b> |             | hypothetical protein                                                                                           | 1019.17 | 95.5386 | 15.7486  | 177.172 | OK | 804.077 | 75.7943 | 13.1025  | 140.168 | OK | 798.053 | 70.7724 | 27.1365 | 114.576 | OK | 736.148 | 67.2529 | 23.5703  | 111.731 | OK | -0.33399 | -0.4329  | -0.50649 | -1.2605   | -1.34994 | -1.42059 |
| <b>RSc1796</b> |             | putative N-acetylmuramoyl-L-alanine amidase protein                                                            | 3276.56 | 242.543 | 106.898  | 377.981 | OK | 2381.87 | 177.088 | 78.5667  | 275.701 | OK | 2590.89 | 183.014 | 101.269 | 264.777 | OK | 2254.68 | 163.07  | 88.895   | 236.951 | OK | -0.45377 | -0.40629 | -0.57275 | -1.36962  | -1.32527 | -1.48736 |
| <b>RSc1797</b> |             | pyruvate dehydrogenase E1 component alpha subunit oxidoreductase protein                                       | 1207.79 | 83.6372 | 25.3594  | 141.836 | OK | 229.999 | 15.9923 | 6.25138  | 25.7722 | OK | 322.333 | 21.3449 | 10.4141 | 32.2894 | OK | 486.837 | 32.9593 | 15.7084  | 50.2086 | OK | -2.38677 | -1.97025 | -1.34346 | -5.22984  | -3.91837 | -2.53759 |
| <b>RSc1798</b> |             | putative pyruvate decarboxyl                                                                                   |         |         |          |         |    |         |         |          |         |    |         |         |         |         |    |         |         |          |         |    |          |          |          |           |          |          |





|                |                    |                                             |         |         |         |         |    |         |         |         |         |    |         |         |         |         |    |         |         |         |         |    |          |          |          |          |          |          |
|----------------|--------------------|---------------------------------------------|---------|---------|---------|---------|----|---------|---------|---------|---------|----|---------|---------|---------|---------|----|---------|---------|---------|---------|----|----------|----------|----------|----------|----------|----------|
| <b>RSc2033</b> | <b><i>ureB</i></b> | urease subunit beta protein                 | 389.414 | 171.45  | 48.6164 | 186.679 | OK | 502.318 | 226.325 | 61.4545 | 232.559 | OK | 487.946 | 178.677 | 68.3068 | 202.429 | OK | 449.667 | 186.681 | 62.9087 | 186.027 | OK | 0.400608 | 0.059566 | 0.122787 | 1.320064 | 1.042152 | 1.088836 |
| <b>RSc2034</b> | <b><i>ureJ</i></b> | urease accessory UREJ transmembrane protein | 1538.39 | 217.264 | 86.0764 | 347.223 | OK | 1709.35 | 243.436 | 95.872  | 390.366 | OK | 1165.96 | 152.605 | 77.9239 | 223.8   | OK | 1011.75 | 138.407 | 67.7465 | 193.473 | OK | 0.164093 | -0.50965 | -0.65053 | 1.120462 | -1.4237  | -1.56975 |
| <b>RSc2035</b> | <b><i>ureA</i></b> | urease subunit gamma protein                | 324.512 | 145.748 | 41.4462 | 150.907 | OK | 344.079 | 158.198 | 43.7842 | 166.21  | OK | 392.358 | 146.193 | 55.7736 | 152.853 | OK | 397.991 | 168.48  | 56.6123 | 165.434 | OK | 0.118255 | 0.004398 | 0.209101 | 1.085421 | 1.003551 | 1.155968 |
| <b>RSc2036</b> | <b><i>ureD</i></b> | urease accessory protein ureD               | 1365.99 | 121.172 | 52.0762 | 190.157 | OK | 1559.39 | 139.055 | 59.5419 | 218.514 | OK | 1568.32 | 131.9   | 71.5446 | 192.312 | OK | 1552.98 | 134.343 | 71.33   | 196.748 | OK | 0.198599 | 0.122388 | 0.148865 | 1.147584 | 1.088535 | 1.108697 |
| <b>RSc2037</b> |                    | ABC transporter ATP-binding protein         | 160.228 | 19.4326 | 8.92135 | 29.9237 | OK | 115     | 14.0477 | 6.41222 | 21.1882 | OK | 107.815 | 12.2227 | 6.60069 | 17.6935 | OK | 116.95  | 13.7742 | 7.24242 | 20.1688 | OK | -0.46814 | -0.66892 | -0.49651 | -1.38333 | -1.58988 | -1.4108  |

|         |             |                                                  |         |         |         |         |    |         |         |         |         |    |         |         |         |         |    |         |         |          |         |    |          |          |          |          |          |          |
|---------|-------------|--------------------------------------------------|---------|---------|---------|---------|----|---------|---------|---------|---------|----|---------|---------|---------|---------|----|---------|---------|----------|---------|----|----------|----------|----------|----------|----------|----------|
| RSc2117 |             | transcription regulator protein                  | 2840.49 | 309.524 | 131.453 | 485.958 | OK | 4283.5  | 469.785 | 195.854 | 743.134 | OK | 3706.84 | 379.594 | 200.635 | 558.538 | OK | 6150.28 | 651.864 | 330.314  | 972.717 | OK | 0.601949 | 0.294406 | 1.07452  | 1.517766 | 1.22638  | 2.106021 |
| RSc2118 |             | putative xanthine permease transmembrane protein | 1724.98 | 89.2291 | 39.5926 | 138.231 | OK | 1718.55 | 89.1683 | 39.6384 | 138.734 | OK | 1265.99 | 63.1123 | 35.7619 | 90.4433 | OK | 2884.76 | 146.219 | 81.548   | 210.643 | OK | -0.00098 | -0.49959 | 0.712545 | -1.00068 | -1.41381 | 1.638692 |
| RSc2119 | <i>atzB</i> | hydroxydechloroatrazine ethylaminohydrolase      | 1658.05 | 84.5446 | 26.7547 | 142.089 | OK | 1340.44 | 68.5552 | 20.2468 | 116.78  | OK | 704.688 | 34.6408 | 15.1138 | 54.0799 | OK | 1486.8  | 74.2943 | 31.1193  | 117.478 | OK | -0.30245 | -1.28724 | -0.18646 | -1.23323 | -2.44061 | -1.13797 |
| RSc2120 |             | hypothetical protein                             | 1024.24 | 79.9535 | 12.7888 | 147.007 | OK | 871.237 | 68.3243 | 12.3974 | 124.104 | OK | 551.301 | 40.9306 | 15.7703 | 66.042  | OK | 1221.17 | 93.0904 | 35.7245  | 150.429 | OK | -0.22676 | -0.96376 | 0.219471 | -1.17021 | -1.95039 | 1.164307 |
| RSc2121 |             | hypothetical protein                             | 229.187 | 40.9953 | 0       | 92.4068 | OK | 193.199 | 34.9258 | 0       | 78.3422 | OK | 127.822 | 20.8543 | 0.60854 | 41.0156 | OK | 217.581 | 37.5209 | 0.486832 | 74.4853 | OK | -0.23117 | -0.97511 | -0.12776 | -1.17378 | -1.9658  | -1.0926  |
| RSc2122 |             | hypothetical protein                             | 6.0846  | 2.52883 | 0       | 6.23418 | OK | 16.5599 | 7.0     |         |         |    |         |         |         |         |    |         |         |          |         |    |          |          |          |          |          |          |

|         |      |                                     |         |         |         |         |    |         |         |         |         |    |         |         |         |         |    |         |         |         |         |    |          |          |          |          |          |          |
|---------|------|-------------------------------------|---------|---------|---------|---------|----|---------|---------|---------|---------|----|---------|---------|---------|---------|----|---------|---------|---------|---------|----|----------|----------|----------|----------|----------|----------|
| RSc2200 |      | ABC transporter ATP-binding proteir | 1432.92 | 57.0695 | 25.2681 | 88.8364 | OK | 2588.87 | 103.35  | 46.5541 | 159.826 | OK | 2055.15 | 79.3045 | 44.9971 | 113.6   | OK | 2177.62 | 85.1153 | 48.2826 | 121.885 | OK | 0.856747 | 0.474683 | 0.576699 | 1.81095  | 1.389613 | 1.491432 |
| RSc2201 |      | putative signal peptide protein     | 1748.31 | 161.076 | 69.0385 | 252.667 | OK | 1586.07 | 146.927 | 62.531  | 230.452 | OK | 1338.24 | 116.722 | 62.8675 | 170.524 | OK | 1840.37 | 165.28  | 87.5127 | 241.582 | OK | -0.13264 | -0.46467 | 0.037171 | -1.0963  | -1.38    | 1.026099 |
| RSc2202 |      | glycosyl transferase protein        | 2077.89 | 219.732 | 93.0515 | 345.56  | OK | 2115.99 | 225.165 | 94.8891 | 355.082 | OK | 1612.78 | 160.498 | 85.5328 | 235.092 | OK | 2088.77 | 214.934 | 112.231 | 317.328 | OK | 0.035238 | -0.45319 | -0.03185 | 1.024726 | -1.36906 | -1.02232 |
| RSc2203 |      | hypothetical protein                | 2121.5  | 180.007 | 78.386  | 279.7   | OK | 3129.83 | 266.898 | 117.194 | 415.635 | OK | 2497.53 | 201.257 | 110.301 | 292.204 | OK | 3028.9  | 250.752 | 133.823 | 367.807 | OK | 0.568235 | 0.160986 | 0.478208 | 1.482709 | 1.118051 | 1.393012 |
| RSc2204 |      | hypothetical protein                | 1091.17 | 61.3195 | 27.4246 | 95.1736 | OK | 1918.19 | 108.153 | 48.153  | 168.191 | OK | 1301.56 | 70.3505 | 39.5372 | 101.175 | OK | 1695.32 | 93.2993 | 52.0201 | 134.397 | OK | 0.818656 | 0.198215 | 0.60552  | 1.763762 | 1.147278 | 1.521527 |
| RSc2205 | dnaE | DNA polymerase III subunit alpha    | 10590.2 | 202.982 | 78.0601 | 328.003 | OK | 133     |         |         |         |    |         |         |         |         |    |         |         |         |         |    |          |          |          |          |          |          |

|                |  |                                               |         |         |         |         |    |         |         |         |         |    |         |         |         |         |    |         |         |         |         |    |          |          |          |          |          |          |
|----------------|--|-----------------------------------------------|---------|---------|---------|---------|----|---------|---------|---------|---------|----|---------|---------|---------|---------|----|---------|---------|---------|---------|----|----------|----------|----------|----------|----------|----------|
| <b>RSc2286</b> |  | hypothetical protein                          | 2694.46 | 219.097 | 95.7914 | 339.017 | OK | 3921.95 | 320.444 | 139.873 | 499.141 | OK | 3946.92 | 305.275 | 166.154 | 442.124 | OK | 2498.55 | 198.318 | 106.619 | 289.821 | OK | 0.548503 | 0.47854  | -0.14375 | 1.462567 | 1.393333 | -1.10478 |
| <b>RSc2287</b> |  | putative thiol:disulfide interchange protein  | 1183.45 | 256.5   | 90.2175 | 377.286 | OK | 760.837 | 167.018 | 59.9112 | 238.803 | OK | 938.102 | 182.593 | 85.2624 | 267.276 | OK | 794.169 | 165.197 | 72.6669 | 223.399 | OK | -0.61896 | -0.49033 | -0.63477 | -1.53576 | -1.40476 | -1.55269 |
| <b>RSc2288</b> |  | hypothetical protein                          | 4084.8  | 292.292 | 130.136 | 454.142 | OK | 3034.15 | 218.032 | 97.3898 | 337.65  | OK | 3155.53 | 215.704 | 119.765 | 311.018 | OK | 3843.92 | 268.832 | 145.608 | 389.266 | OK | -0.42287 | -0.43836 | -0.12071 | -1.34059 | -1.35506 | -1.08727 |
| <b>RSc2289</b> |  | cytochrome c1 precursor protein               | 2065.72 | 111.699 | 50.0262 | 172.878 | OK | 1575.95 | 85.4887 | 37.6981 | 133.324 | OK | 1935.11 | 100.738 | 56.723  | 144.625 | OK | 1836.74 | 97.2901 | 54.3282 | 140.07  | OK | -0.38581 | -0.14901 | -0.19925 | -1.30659 | -1.10881 | -1.1481  |
| <b>RSc2290</b> |  | iron oxidase precursor oxidoreductase protein | 46.6486 | 23.2767 | 6.03759 | 21.6906 | OK | 28.5199 | 14.5938 | 3.57783 | 13.6405 | OK | 22.2299 | 9.0779  | 2.86775 | 11.6916 | OK | 22.6646 | 10.6375 | 2.86775 | 12.1328 | OK | -0.67353 | -1.35846 | -1.12973 | -1.59497 | -2.56411 | -2.18817 |
| <b>RSc2291</b> |  | putative transglycosylase protein             | 48.6768 | 6.65561 |         |         |    |         |         |         |         |    |         |         |         |         |    |         |         |         |         |    |          |          |          |          |          |          |

|                |             |                                 |         |         |         |         |    |         |         |         |         |    |         |         |         |         |    |         |         |         |         |    |          |          |          |          |          |          |
|----------------|-------------|---------------------------------|---------|---------|---------|---------|----|---------|---------|---------|---------|----|---------|---------|---------|---------|----|---------|---------|---------|---------|----|----------|----------|----------|----------|----------|----------|
| <b>RSc2378</b> |             | hypothetical protein            | 821.421 | 146.93  | 56.8752 | 227.377 | OK | 650.438 | 117.584 | 45.7716 | 177.658 | OK | 756.928 | 123.494 | 60.854  | 174.286 | OK | 654.555 | 112.875 | 52.6996 | 161.628 | OK | -0.32144 | -0.25069 | -0.3804  | -1.24957 | -1.18977 | -1.30171 |
| <b>RSc2379</b> | <i>mrp</i>  | MRP family ATP-binding proteir  | 4224.74 | 293.501 | 129.985 | 456.957 | OK | 4162.06 | 290.336 | 128.684 | 451.457 | OK | 4674.95 | 310.546 | 171.284 | 449.622 | OK | 3907.39 | 265.382 | 144.332 | 385.915 | OK | -0.01564 | 0.081442 | -0.14529 | -1.0109  | 1.058075 | -1.10596 |
| <b>RSc2380</b> |             | hypothetical protein            | 41900.6 | 5765.82 | 1899.73 | 9624.37 | OK | 29892.5 | 4147.07 | 1378.69 | 6868.21 | OK | 45648   | 5830.46 | 2401.8  | 9248.49 | OK | 29640.8 | 3952.71 | 1711.62 | 6187.78 | OK | -0.47543 | 0.016084 | -0.54468 | -1.39034 | 1.011211 | -1.4587  |
| <b>RSc2381</b> | <i>metG</i> | methionyl-tRNA synthetase       | 6743.77 | 227.981 | 96.2432 | 359.86  | OK | 10472.3 | 354.736 | 142.386 | 567.053 | OK | 9332.11 | 306.494 | 168.403 | 444.414 | OK | 6481.18 | 215.196 | 119.932 | 310.527 | OK | 0.637832 | 0.426945 | -0.08326 | 1.555989 | 1.344384 | -1.05941 |
| <b>RSc2382</b> |             | lipoprotein                     | 2213.78 | 374.174 | 142.916 | 591.35  | OK | 1412.19 | 241.091 | 90.3749 | 381.543 | OK | 2519.76 | 390.066 | 192.701 | 569.327 | OK | 2467.73 | 402.601 | 188.957 | 601.035 | OK | -0.63413 | 0.060009 | 0.105641 | -1.552   | 1.042472 | 1.075973 |
| <b>RSc2383</b> |             | putative signal peptide protein |         |         |         |         |    |         |         |         |         |    |         |         |         |         |    |         |         |         |         |    |          |          |          |          |          |          |





|         |             |                                                                             |         |         |         |         |    |         |         |         |         |    |         |         |         |         |    |         |         |         |         |    |          |          |          |                 |          |          |
|---------|-------------|-----------------------------------------------------------------------------|---------|---------|---------|---------|----|---------|---------|---------|---------|----|---------|---------|---------|---------|----|---------|---------|---------|---------|----|----------|----------|----------|-----------------|----------|----------|
| RSc2690 | <i>oxyR</i> | hydrogen peroxide-inducible genes activator transcription regulator protein | 4236.91 | 344.519 | 150.674 | 535.932 | OK | 5474.9  | 447.329 | 190.773 | 700.445 | OK | 8012.77 | 619.749 | 331.976 | 906.224 | OK | 4406.01 | 349.72  | 186.133 | 511.583 | OK | 0.376753 | 0.8471   | 0.021617 | 1.298416        | 1.798882 | 1.015096 |
| RSc2691 |             | hypothetical protein                                                        | 708.856 | 119.811 | 47.4409 | 187.391 | OK | 734.157 | 125.336 | 48.8641 | 194.626 | OK | 940.325 | 145.565 | 72.1897 | 203.933 | OK | 755.186 | 123.206 | 58.0325 | 180.416 | OK | 0.06504  | 0.280903 | 0.040312 | 1.046114        | 1.214955 | 1.028336 |
| RSc2692 |             | signal peptide protein                                                      | 387.386 | 71.6799 | 18.9415 | 122.488 | OK | 346.839 | 64.8833 | 15.7846 | 113.901 | OK | 489.058 | 82.3274 | 35.1292 | 129.056 | OK | 442.414 | 78.8611 | 31.5167 | 124.696 | OK | -0.14372 | 0.199804 | 0.137745 | -1.10475        | 1.148542 | 1.100184 |
| RSc2693 |             | putative outer membrane usher transmembrane proteir                         | 435.049 | 13.3226 | 2.6336  | 24.0393 | OK | 489.438 | 15.0153 | 3.34398 | 26.7825 | OK | 373.462 | 11.1267 | 3.96253 | 18.2634 | OK | 417.03  | 12.5482 | 4.81433 | 20.2804 | OK | 0.172558 | -0.25985 | -0.0864  | 1.127055        | -1.19735 | -1.06171 |
| RSc2694 |             | putative pili assembly chaperone transmembrane proteir                      | 33.4653 | 3.59196 | 1.6058  | 5.57804 | OK | 68.9997 | 7.45318 | 3.46514 | 11.4096 | OK | 53.3517 | 5.38529 | 2.83474 | 7.92061 | OK | 38.9832 | 4.07068 | 2.001   | 6.00299 | OK | 1.053085 | 0.584253 | 0.180499 | <b>2.074962</b> | 1.499262 | 1.133275 |
| RSc2695 |             | signal peptide protein                                                      | 48.67   |         |         |         |    |         |         |         |         |    |         |         |         |         |    |         |         |         |         |    |          |          |          |                 |          |          |

|         |                   |                                                             |         |         |         |         |    |         |         |         |         |    |         |         |         |         |    |         |         |         |         |    |          |          |          |          |          |          |
|---------|-------------------|-------------------------------------------------------------|---------|---------|---------|---------|----|---------|---------|---------|---------|----|---------|---------|---------|---------|----|---------|---------|---------|---------|----|----------|----------|----------|----------|----------|----------|
| RSc2774 | <i>corA</i>       | magnesium/cobalt transporter CorA                           | 1752.36 | 140.89  | 61.3247 | 219.752 | OK | 1652.31 | 133.479 | 58.1147 | 208.584 | OK | 1924    | 147.199 | 80.6185 | 212.894 | OK | 1475.02 | 115.775 | 62.0802 | 169.022 | OK | -0.07796 | 0.063199 | -0.28325 | -1.05552 | 1.04478  | -1.21693 |
| RSc2775 | <i>ripW, popW</i> | Type III effector protein, harpin with pectate lyase domain | 2901.34 | 190.467 | 85.7553 | 295.129 | OK | 2314.71 | 152.546 | 67.7816 | 237.095 | OK | 5387.42 | 338.747 | 186.537 | 491.022 | OK | 4067.85 | 261.202 | 142.849 | 379.522 | OK | -0.3203  | 0.830667 | 0.455625 | -1.24859 | 1.778508 | 1.371377 |
| RSc2776 | <i>mtgA</i>       | monofunctional biosynthetic peptidoglycan transglycosylase  | 366.09  | 43.4186 | 19.9141 | 66.8674 | OK | 495.878 | 59.2257 | 26.2171 | 92.1711 | OK | 356.79  | 39.6005 | 21.7179 | 57.4037 | OK | 368.98  | 42.5123 | 22.7092 | 61.0985 | OK | 0.44791  | -0.13279 | -0.03043 | 1.364063 | -1.09642 | -1.02132 |
| RSc2777 | <i>aroE</i>       | shikimate 5-dehydrogenase                                   | 2054.57 | 174.328 | 35.1024 | 312.775 | OK | 2483.07 | 211.746 | 39.7874 | 383.539 | OK | 1645.01 | 132.559 | 37.9396 | 226.465 | OK | 1625.51 | 134.57  | 43.1132 | 225.499 | OK | 0.28053  | -0.39517 | -0.37345 | 1.214641 | -1.3151  | -1.29544 |
| RSc2778 |                   | hypothetical protein                                        | 3114.3  | 266.351 | 51.8283 | 480.737 | OK | 3896.19 | 334.911 | 66.1882 | 605.493 | OK | 3872.45 | 314.445 | 143.075 | 485.742 | OK | 3338.05 | 278.523 | 125.242 | 432.046 | OK | 0.330449 | 0.239479 | 0.064468 | 1.257405 | 1.180566 | 1.045699 |
| R       |                   |                                                             |         |         |         |         |    |         |         |         |         |    |         |         |         |         |    |         |         |         |         |    |          |          |          |          |          |          |

|         |              |                                                      |         |         |         |         |    |         |         |         |         |    |         |         |         |         |    |         |         |         |         |    |          |          |          |          |          |          |
|---------|--------------|------------------------------------------------------|---------|---------|---------|---------|----|---------|---------|---------|---------|----|---------|---------|---------|---------|----|---------|---------|---------|---------|----|----------|----------|----------|----------|----------|----------|
| RSc2852 | <i>mraW</i>  | S-adenosyl-methyltransferase MraW                    | 8245.65 | 665.444 | 272.631 | 1057.52 | OK | 9481.49 | 768.837 | 308.387 | 1225.03 | OK | 7695.99 | 590.931 | 315.474 | 860.655 | OK | 8658.8  | 682.164 | 357.895 | 1003.47 | OK | 0.208361 | -0.17133 | 0.035801 | 1.155374 | -1.12609 | 1.025126 |
| RSc2853 |              | cell division protein MraZ                           | 3151.82 | 759.52  | 260.456 | 1057.89 | OK | 2967.91 | 725.339 | 245.144 | 996.489 | OK | 4818.33 | 1032.77 | 459.975 | 1504.32 | OK | 3587.36 | 827.453 | 344.463 | 1117.06 | OK | -0.06643 | 0.443359 | 0.123589 | -1.04712 | 1.359767 | 1.089442 |
| RSc2854 |              | hypothetical protein                                 | 1700.65 | 231.059 | 92.6524 | 368.179 | OK | 1427.83 | 195.56  | 77.5647 | 312.892 | OK | 1418.27 | 178.991 | 92.0009 | 265.115 | OK | 1504.93 | 198.192 | 97.5949 | 290.887 | OK | -0.24065 | -0.36837 | -0.22136 | -1.18152 | -1.2909  | -1.16583 |
| RSc2855 |              | putative outer membrane porin signal peptide protein | 68001.5 | 4344.58 | 1542.98 | 7134.47 | OK | 19388.9 | 1243.43 | 466.329 | 2010.58 | OK | 32242.2 | 1974.55 | 924.52  | 3022.15 | OK | 17530.7 | 1095.76 | 559.078 | 1633.03 | OK | -1.80489 | -1.13769 | -1.98728 | -3.49403 | -2.20029 | -3.9649  |
| RSc2856 |              | metabolite transport protein                         | 3273.51 | 182.052 | 81.1355 | 281.706 | OK | 1956.83 | 109.185 | 48.5935 | 169.736 | OK | 1956.23 | 104.667 | 58.863  | 150.262 | OK | 2565.64 | 139.744 | 77.9706 | 201.472 | OK | -0.73758 | -0.79854 | -0.38156 | -1.66737 | -1.73934 | -1.30275 |
| RSc2857 | <i>fadD1</i> | acyl-CoA synthetase                                  | 9723.19 | 404.51  | 164.166 | 644     |    |         |         |         |         |    |         |         |         |         |    |         |         |         |         |    |          |          |          |          |          |          |





|         |             |                                                                                          |         |         |         |         |    |         |         |         |         |    |         |         |         |         |    |         |         |         |         |    |          |          |          |          |                 |          |
|---------|-------------|------------------------------------------------------------------------------------------|---------|---------|---------|---------|----|---------|---------|---------|---------|----|---------|---------|---------|---------|----|---------|---------|---------|---------|----|----------|----------|----------|----------|-----------------|----------|
| RSc3094 |             | hypothetical protein                                                                     | 5245.94 | 533.713 | 221.637 | 843.45  | OK | 3994.63 | 408.859 | 172.708 | 644.253 | OK | 4237.02 | 406.376 | 215.768 | 597.197 | OK | 5201.08 | 515.163 | 265.394 | 762.939 | OK | -0.38446 | -0.39325 | -0.05104 | -1.30537 | -1.31335        | -1.03601 |
| RSc3095 |             | putative serine-rich protein                                                             | 551.67  | 51.9413 | 23.7507 | 80.0826 | OK | 1086.52 | 102.869 | 44.4565 | 160.926 | OK | 494.615 | 44.0476 | 24.7818 | 63.081  | OK | 561.177 | 51.49   | 28.1612 | 74.8712 | OK | 0.985854 | -0.23782 | -0.01259 | 1.980486 | -1.17921        | -1.00876 |
| RSc3096 | <i>kefC</i> | glutathione-regulated potassium-efflux system protein KefK                               | 1009.03 | 37.4106 | 16.5835 | 58.0931 | OK | 1582.39 | 58.7971 | 25.9774 | 91.4976 | OK | 1271.55 | 45.7334 | 26.2289 | 65.2044 | OK | 1679.9  | 61.147  | 34.7266 | 87.519  | OK | 0.652298 | 0.289801 | 0.708835 | 1.57167  | 1.222472        | 1.634483 |
| RSc3097 |             | putative NAD(P)H oxidoreductase (NAD(P)H dehydrogenase (quinone)) oxidoreductase protein | 298.145 | 49.6118 | 20.9978 | 76.1316 | OK | 360.639 | 60.605  | 25.1035 | 93.0236 | OK | 484.612 | 73.9383 | 37.7255 | 103.687 | OK | 372.607 | 59.867  | 29.3935 | 85.7503 | OK | 0.288754 | 0.575639 | 0.271078 | 1.221584 | 1.490337        | 1.206709 |
| RSc3098 |             | hypothetical protein                                                                     | 1551.57 | 187.119 | 76.7075 | 296.929 | OK | 1899.79 | 230.755 | 94.4733 | 366.327 | OK | 3524.55 | 397.442 | 207.117 | 586.481 | OK | 1944.63 | 227.769 | 115.653 | 333.541 | OK | 0.302406 | 1.086788 | 0.283615 | 1.233199 | <b>2.124007</b> | 1.217241 |
| RSc3099 |             | putative signal                                                                          |         |         |         |         |    |         |         |         |         |    |         |         |         |         |    |         |         |         |         |    |          |          |          |          |                 |          |





|                |             |                                                                  |         |         |         |         |    |         |         |         |         |    |         |         |         |         |    |         |         |         |         |    |          |          |          |          |          |          |
|----------------|-------------|------------------------------------------------------------------|---------|---------|---------|---------|----|---------|---------|---------|---------|----|---------|---------|---------|---------|----|---------|---------|---------|---------|----|----------|----------|----------|----------|----------|----------|
| <b>RSc3385</b> | <i>kdpD</i> | two-component sensor kinase KDPD transcription regulator         | 2605.22 | 63.2649 | 27.8064 | 98.4781 | OK | 2062.63 | 50.1605 | 21.8332 | 78.4758 | OK | 1579.43 | 37.4222 | 21.4707 | 53.3945 | OK | 1900.2  | 45.3775 | 25.9409 | 64.8185 | OK | -0.33485 | -0.75751 | -0.47943 | -1.26125 | -1.69057 | -1.39419 |
| <b>RSc3386</b> |             | putative outermembrane signal peptide protein                    | 173.411 | 7.82059 | 4.00987 | 11.6246 | OK | 400.199 | 18.0965 | 9.03234 | 27.1375 | OK | 318.999 | 13.9059 | 8.43092 | 19.3791 | OK | 266.536 | 11.7887 | 7.11234 | 16.4623 | OK | 1.210361 | 0.830348 | 0.592055 | 2.313956 | 1.778114 | 1.507393 |
| <b>RSc3387</b> |             | two-component response regulator transcription regulator protein | 5025.88 | 308.257 | 135.657 | 479.713 | OK | 1359.75 | 83.7018 | 36.6639 | 130.555 | OK | 1238.21 | 72.8784 | 40.8343 | 104.995 | OK | 1267.41 | 76.0764 | 42.2496 | 109.817 | OK | -1.8808  | -2.08057 | -2.01861 | -3.6828  | -4.22974 | -4.05194 |
| <b>RSc3388</b> |             | two-component response regulator transcription regulator protein | 423.894 | 56.1705 | 19.9762 | 92.4273 | OK | 265.879 | 35.5092 | 12.423  | 58.5373 | OK | 206.738 | 25.4837 | 12.1573 | 38.7268 | OK | 179.504 | 23.066  | 10.5886 | 35.2953 | OK | -0.66162 | -1.14024 | -1.28404 | -1.58186 | -2.20417 | -2.43521 |
| <b>RSc3389</b> |             | hypothetical protein                                             | 245.412 | 40.8369 | 3.66083 | 79.5399 | OK | 200.559 | 33.7038 | 5.88172 | 61.674  | OK | 163.39  | 24.9287 | 10.2223 | 39.6688 | OK | 155.933 | 25.0538 | 10.4436 | 39.8463 | OK | -0.27696 | -0.71207 | -0.70484 | -1.21164 | -1.63815 | -1.62997 |
| <b>RSc3390</b> |             | por                                                              |         |         |         |         |    |         |         |         |         |    |         |         |         |         |    |         |         |         |         |    |          |          |          |          |          |          |



|                |  |                                                       |         |         |         |         |    |         |         |         |         |    |         |         |         |         |    |         |         |         |         |    |          |          |          |          |          |          |
|----------------|--|-------------------------------------------------------|---------|---------|---------|---------|----|---------|---------|---------|---------|----|---------|---------|---------|---------|----|---------|---------|---------|---------|----|----------|----------|----------|----------|----------|----------|
| <b>RSp0181</b> |  | hypothetical protein                                  | 689.588 | 182.463 | 62.0158 | 244.565 | OK | 581.438 | 156.222 | 53.1109 | 203.857 | OK | 634.664 | 148.02  | 66.1984 | 201.262 | OK | 470.518 | 118.877 | 49.5703 | 147.456 | OK | -0.22401 | -0.30181 | -0.61813 | -1.16797 | -1.23269 | -1.53489 |
| <b>RSp0182</b> |  | transporter transmembrane protein                     | 293.075 | 15.7285 | 7.99102 | 23.4056 | OK | 265.879 | 14.3143 | 7.28176 | 21.2779 | OK | 255.644 | 13.2108 | 7.97643 | 18.4717 | OK | 242.058 | 12.7261 | 7.55662 | 17.8653 | OK | -0.13592 | -0.25166 | -0.30559 | -1.0988  | -1.19058 | -1.23592 |
| <b>RSp0183</b> |  | probable 3-carboxymuconate cyclase protein            | 235.271 | 14.1472 | 7.10343 | 21.0491 | OK | 207.919 | 12.5469 | 6.3722  | 18.6987 | OK | 192.289 | 11.1018 | 6.64686 | 15.5093 | OK | 191.29  | 11.2588 | 6.64686 | 15.87   | OK | -0.17319 | -0.34972 | -0.32946 | -1.12755 | -1.27432 | -1.25655 |
| <b>RSp0185</b> |  | putative transcription regulator protein              | 106.481 | 9.32979 | 4.59494 | 14.0002 | OK | 117.76  | 10.3716 | 5.09751 | 15.5797 | OK | 97.8115 | 8.12938 | 4.53291 | 11.6864 | OK | 124.202 | 10.6142 | 5.87862 | 15.2986 | OK | 0.152722 | -0.1987  | 0.186079 | 1.111665 | -1.14766 | 1.137668 |
| <b>RSp0186</b> |  | periplasmic substrate binding ABC transporter proteir | 277.863 | 31.0668 | 14.4859 | 47.2972 | OK | 334.879 | 37.6899 | 17.4528 | 57.8562 | OK | 227.856 | 23.9115 | 13.3434 | 34.4345 | OK | 213.954 | 23.2589 | 12.5686 | 32.971  | OK | 0.278804 | -0.37767 | -0.41759 | 1.213189 | -1.29924 | -1.3357  |
| <b>RSp0187</b> |  | hypothetical protein                                  | 1.0141  | 17.0    |         |         |    |         |         |         |         |    |         |         |         |         |    |         |         |         |         |    |          |          |          |          |          |          |



|                |             |                                     |         |         |         |         |    |         |         |         |         |    |         |         |         |         |    |         |         |         |         |    |          |          |          |                 |                 |                 |
|----------------|-------------|-------------------------------------|---------|---------|---------|---------|----|---------|---------|---------|---------|----|---------|---------|---------|---------|----|---------|---------|---------|---------|----|----------|----------|----------|-----------------|-----------------|-----------------|
| <b>RSp0352</b> | <i>flgL</i> | flagellar hook-associated protein 3 | 184.566 | 15.0648 | 7.44912 | 22.6182 | OK | 5969.86 | 489.634 | 207.221 | 768.478 | OK | 2698.71 | 209.497 | 114.838 | 302.026 | OK | 1447.82 | 115.35  | 61.8615 | 168.616 | OK | 5.02245  | 3.797676 | 2.936765 | <b>32.50186</b> | <b>13.90639</b> | <b>7.656922</b> |
| <b>RSp0353</b> |             | hypothetical protein                | 1858.85 | 205.688 | 86.1277 | 324.082 | OK | 2104.95 | 234.45  | 97.9864 | 370.912 | OK | 2264.11 | 235.267 | 125.099 | 343.19  | OK | 1826.77 | 196.57  | 101.787 | 289.991 | OK | 0.188823 | 0.193841 | -0.06541 | 1.139833        | 1.143805        | -1.04639        |
| <b>RSp0354</b> |             | putative oxidoreductase protein     | 2902.35 | 170.231 | 76.8212 | 263.686 | OK | 5034.22 | 296.295 | 130.591 | 461.898 | OK | 3890.23 | 219.223 | 122.374 | 316.044 | OK | 3908.29 | 224.419 | 123.987 | 323.709 | OK | 0.79954  | 0.364905 | 0.398701 | 1.740547        | 1.287797        | 1.31832         |
| <b>RSp0355</b> |             | hypothetical protein                | 1456.25 | 161.974 | 67.356  | 256.387 | OK | 2327.59 | 260.6   | 109.073 | 411.349 | OK | 1120.39 | 116.995 | 62.0741 | 71.904  | OK | 1290.07 | 139.527 | 71.7624 | 206.199 | OK | 0.686075 | -0.46932 | -0.21522 | 1.6089          | -1.38445        | -1.16088        |
| <b>RSp0356</b> |             | putative signal peptide protein     | 588.178 | 138.64  | 50.0403 | 192.167 | OK | 1659.67 | 396.635 | 132.503 | 558.438 | OK | 1406.04 | 295.394 | 133.635 | 426.319 | OK | 1139.58 | 257.253 | 108.515 | 344.385 | OK | 1.516468 | 1.091297 | 0.891844 | <b>2.860899</b> | <b>2.130655</b> | 1.855547        |
| <b>RSp0357</b> | <i>fab</i>  |                                     |         |         |         |         |    |         |         |         |         |    |         |         |         |         |    |         |         |         |         |    |          |          |          |                 |                 |                 |

|                |  |                                 |         |         |         |         |    |         |         |         |         |    |         |         |         |         |    |         |         |         |         |    |          |          |          |          |          |          |
|----------------|--|---------------------------------|---------|---------|---------|---------|----|---------|---------|---------|---------|----|---------|---------|---------|---------|----|---------|---------|---------|---------|----|----------|----------|----------|----------|----------|----------|
| <b>RSp0434</b> |  | transcription regulator protein | 675.391 | 57.7629 | 25.1973 | 90.2318 | OK | 643.078 | 55.2781 | 24.5639 | 86.0087 | OK | 780.269 | 63.3583 | 35.8971 | 90.194  | OK | 746.12  | 62.2554 | 34.7862 | 89.5691 | OK | -0.06344 | 0.13339  | 0.108056 | -1.04495 | 1.096868 | 1.077775 |
| <b>RSp0435</b> |  | hypothetical protein            | 49.6909 | 52.2096 | 0       | 171.262 | OK | 57.9598 | 63.2505 | 0       | 193.157 | OK | 64.4667 | 49.8636 | 0       | 132.265 | OK | 33.5437 | 32.908  | 0       | 103.01  | OK | 0.276762 | -0.06633 | -0.66588 | 1.211473 | -1.04705 | -1.58653 |
| <b>RSp0436</b> |  | transcription regulator protein | 199.778 | 28.2142 | 12.7135 | 42.6214 | OK | 187.679 | 26.7282 | 11.8798 | 40.3288 | OK | 253.421 | 33.1688 | 17.7847 | 48.2141 | OK | 118.763 | 16.2467 | 8.22415 | 23.9529 | OK | -0.07806 | 0.233405 | -0.79627 | -1.0556  | 1.175607 | -1.73661 |
| <b>RSp0437</b> |  | transport transmembrane protein | 372.175 | 22.6329 | 11.2346 | 33.9147 | OK | 340.399 | 20.775  | 10.3907 | 31.172  | OK | 346.786 | 20.2424 | 11.9675 | 28.5138 | OK | 223.927 | 13.3279 | 7.8569  | 18.7317 | OK | -0.12357 | -0.16104 | -0.76397 | -1.08943 | -1.11809 | -1.69816 |
| <b>RSp0438</b> |  | putative hydrolase protein      | 350.879 | 52.3065 | 22.768  | 79.2544 | OK | 296.239 | 44.5528 | 19.2986 | 66.2441 | OK | 596.873 | 82.1847 | 42.5683 | 119.148 | OK | 245.685 | 35.441  | 17.9685 | 51.0178 | OK | -0.23147 | 0.65188  | -0.56157 | -1.17403 | 1.571214 | -1.47588 |
| <b>RSp0439</b> |  | hypothetical protein            | 39.5499 | 174.258 | 10.0763 | 36.3625 | OK | 37.7199 | 176.874 | 9.63824 | 37.6    |    |         |         |         |         |    |         |         |         |         |    |          |          |          |          |          |          |

|                |             |                                              |         |         |         |         |    |         |         |          |         |    |         |         |         |         |    |         |         |         |         |    |          |          |          |          |          |          |
|----------------|-------------|----------------------------------------------|---------|---------|---------|---------|----|---------|---------|----------|---------|----|---------|---------|---------|---------|----|---------|---------|---------|---------|----|----------|----------|----------|----------|----------|----------|
| <b>RSp0555</b> | <i>chrA</i> | chromate transporter                         | 534.431 | 32.9671 | 15.6463 | 49.9829 | OK | 298.999 | 18.5115 | 9.29168  | 27.7149 | OK | 260.09  | 15.394  | 9.16625 | 21.546  | OK | 408.87  | 24.6825 | 14.2762 | 34.7685 | OK | -0.83261 | -1.09866 | -0.41754 | -1.7809  | -2.14156 | -1.33565 |
| <b>RSp0556</b> |             | hypothetical protein                         | 418.823 | 69.6928 | 28.9746 | 105.223 | OK | 209.759 | 35.2499 | 14.8979  | 52.6704 | OK | 155.609 | 23.7417 | 12.2666 | 33.9067 | OK | 271.976 | 43.6986 | 21.5244 | 58.0926 | OK | -0.98339 | -1.55359 | -0.67342 | -1.97711 | -2.93546 | -1.59485 |
| <b>RSp0561</b> |             | hypothetical protein                         | 7.0987  | 25.5676 | 0       | 23.9925 | OK | 11.04   | 42.1667 | 0.420921 | 34.5156 | OK | 17.7839 | 38.3851 | 2.0762  | 31.5582 | OK | 21.7581 | 72.5778 | 3.32191 | 34.8801 | OK | 0.721798 | 0.58623  | 1.505212 | 1.649236 | 1.501318 | 2.838663 |
| <b>RSp0562</b> |             | hypothetical protein                         | 87.2126 | 68.4844 | 31.4103 | 106.01  | OK | 119.6   | 97.0635 | 45.448   | 148.518 | OK | 103.369 | 62.3898 | 33.7996 | 90.5345 | OK | 90.6586 | 66.5679 | 35.9792 | 96.9236 | OK | 0.503153 | -0.13447 | -0.04095 | 1.417308 | -1.09769 | -1.02879 |
| <b>RSp0563</b> |             | putative thiol:disulfide interchange protein | 152.115 | 24.7371 | 4.38573 | 44.896  | OK | 218.959 | 35.952  | 6.46318  | 65.3243 | OK | 187.843 | 28.0532 | 10.5886 | 45.0869 | OK | 146.867 | 23.0721 | 5.92051 | 40.0773 | OK | 0.539396 | 0.181489 | -0.10053 | 1.453364 | 1.134054 | -1.07217 |
| <b>RSp0564</b> |             | putative lipoprotein                         | 416.795 | 30.4329 | 10.3683 | 50.6735 |    |         |         |          |         |    |         |         |         |         |    |         |         |         |         |    |          |          |          |          |          |          |
